# Supplementary material for: Electrochemical dual α,β-C(sp3)–H functionalization of cyclic N-aryl amines
Source: Royal Society of Chemistry journal article supplement (doi:10.1039/d3gc00344b), 2023-01-01

# Supporting Information

## Electrochemical Dual $\alpha,\beta$ -C(sp<sup>3</sup>)-H Functionalization of Cyclic *N*-Aryl Amines

Tian Feng<sup>a</sup>, Zile Zhu<sup>a</sup>, Dongmei Zhang<sup>b</sup>, Siyi Wang<sup>a</sup>, Ruopu Li<sup>a</sup>, Zhaolin Zhu<sup>a</sup>,  
Xinxing Zhang<sup>b\*</sup> and Youai Qiu<sup>a\*</sup>

<sup>a</sup>State Key Laboratory and Institute of Elemento-Organic Chemistry, College of  
Chemistry, Nankai University, 94 Weijin Road, Tianjin, 300071, China

Email: \*[qiuyouai@nankai.edu.cn](mailto:qiuyouai@nankai.edu.cn)

<sup>b</sup>Key Laboratory of Advanced Energy Materials Chemistry (Ministry of Education),  
Renewable Energy Conversion and Storage Center (RECAST), Frontiers Science  
Center for New Organic Matter, College of Chemistry, Nankai University, 94 Weijin  
Road, Tianjin, 300071, China

Email: \*[Zhangxx@nankai.edu.cn](mailto:Zhangxx@nankai.edu.cn)

## Table of Contents

|                                                                                            |     |
|--------------------------------------------------------------------------------------------|-----|
| General Remarks .....                                                                      | 2   |
| Optimization of the Electrochemical Dual C(sp <sup>3</sup> )-H Functionalization.....      | 4   |
| General Procedure of the Electrochemical Dual C(sp <sup>3</sup> )-H Functionalization..... | 7   |
| Graphical Guide .....                                                                      | 8   |
| Characterization Data of Products .....                                                    | 9   |
| Gram-Scale Synthesis of <b>3</b> .....                                                     | 30  |
| Control Experiments .....                                                                  | 31  |
| X-ray Crystallography.....                                                                 | 33  |
| Cyclic Voltammetry .....                                                                   | 35  |
| Bipolar Ultramicroelectrode Mass Spectrometry.....                                         | 37  |
| DFT Calculations .....                                                                     | 39  |
| References .....                                                                           | 116 |
| NMR Spectrum .....                                                                         | 118 |

## General Remarks

Catalytic reactions were carried out in undivided electrochemical cells (15 mL) using pre-dried glassware, if not noted otherwise. All the starting materials were obtained from commercial sources or synthesized according to literature methods.<sup>1</sup> Fe(phen)Cl<sub>3</sub> and Fe(phen)Cl<sub>2</sub> were synthesized according to literature methods.<sup>2-3</sup> Acetonitrile was purchased from *Energy Chemical*. Nickel electrodes (10 mm × 15 mm × 0.2 mm, 99.9%; obtained from Chuxi, Shanghai, China) and carbon felt electrodes (10 mm × 15 mm × 3 mm, Jinglong company, Beijing, China) were connected using stainless steel adapters. Electrocatalysis was conducted using an HSPY-36-03 potentiostat in constant current mode. Cyclic Voltammetry studies were performed using a Shanghai Chenhua CHI760E workstation. Yields refer to isolated compounds, estimated to be >95% purity as determined by <sup>1</sup>H-NMR. Flash chromatography was performed using Silica gel (200-300 mesh) purchased from Qingdao Haiyang Chemical Co., China. Thin layer chromatography was used for product detection using acrylic silicone plates, with visualization effected via exposure to UV Light ( $\lambda_{\text{ex}} = 254 \text{ nm}$ ). NMR spectra were recorded on Bruker AVANCE AV 400, Bruker AVANCE AV 600 and Bruker AVANCE AV 800 in the solvent indicated; using CDCl<sub>3</sub> or CD<sub>3</sub>OD-*d*<sub>4</sub> as the solvent with tetramethylsilane (TMS) as the internal standard at room temperature, chemical shifts ( $\delta$ ) are given in ppm relative to the residual solvent peak, coupling constants (J) are reported in Hertz (Hz). Multiplicities are recorded as: s = singlet, d = doublet, t = triplet, q = quadruplet, dd = doublet of doublets, m = multiplet. High-resolution mass spectrometry (HRMS) data were collected on a MicrOTOF mass spectrometer with ESI mass analyzer. Melting points were recorded on Shanghai ShenGuang WRS-2 apparatus. Visualization was achieved under a UV lamp (254 nm and 365 nm). X-ray crystallography and data were performed and collected using Rigaku XtalAB PRO MM007 DW and Olex2.

Mass spectra were acquired using an LTQ-XL mass spectrometer (Thermo-Fisher, Waltham, MA). The inlet capillary temperature of the mass spectrometer was maintained at 275 °C unless otherwise stated. The tube lens voltage on the LTQ-XL is

set to be 0 V. The mass-to-charge ( $m/z$ ) range was adjusted to 50 – 500. All the data were analyzed by default Xcalibur package (Version 2.0.7 Thermo Fisher Scientific, US). All these experiments were carried out under atmospheric pressure.

## Optimization of the Electrochemical Dual C(sp<sup>3</sup>)-H Functionalization<sup>a</sup>

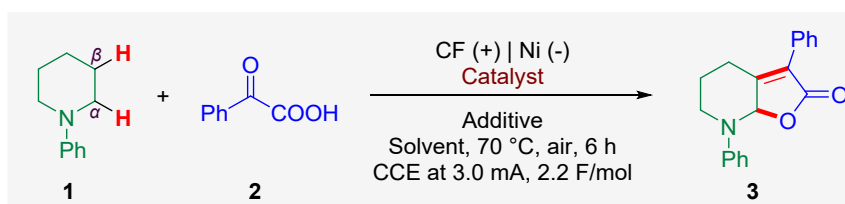

| Entry | Catalyst (10 mol%)                             | Additive (20 mol%) | Solvent            | 3 [%] <sup>b</sup> |
|-------|------------------------------------------------|--------------------|--------------------|--------------------|
| 1     | Fe(phen)Cl <sub>3</sub>                        | --                 | CH <sub>3</sub> CN | 80                 |
| 2     | Fe(phen)Cl <sub>2</sub>                        | --                 | CH <sub>3</sub> CN | 58                 |
| 3     | FeCl <sub>3</sub>                              | --                 | CH <sub>3</sub> CN | 44                 |
| 4     | FeCl <sub>2</sub>                              | --                 | CH <sub>3</sub> CN | 36                 |
| 5     | FeCl <sub>3</sub> + 1,10-phen                  | --                 | CH <sub>3</sub> CN | 59                 |
| 6     | Ferrocene                                      | --                 | CH <sub>3</sub> CN | N.D. <sup>c</sup>  |
| 7     | Fe(acac) <sub>3</sub>                          | --                 | CH <sub>3</sub> CN | 50                 |
| 8     | Fe(OTf) <sub>3</sub>                           | --                 | CH <sub>3</sub> CN | 40                 |
| 9     | Y(OTf) <sub>3</sub>                            | --                 | CH <sub>3</sub> CN | trace              |
| 10    | Bi(OTf) <sub>3</sub>                           | --                 | CH <sub>3</sub> CN | N.D.               |
| 11    | Sc(OTf) <sub>3</sub>                           | --                 | CH <sub>3</sub> CN | trace              |
| 12    | Cu(OTf) <sub>2</sub>                           | --                 | CH <sub>3</sub> CN | trace              |
| 13    | CuCl <sub>2</sub>                              | --                 | CH <sub>3</sub> CN | 33                 |
| 14    | CoCl <sub>2</sub>                              | --                 | CH <sub>3</sub> CN | trace              |
| 15    | InCl <sub>3</sub>                              | --                 | CH <sub>3</sub> CN | trace              |
| 16    | SnCl <sub>4</sub>                              | --                 | CH <sub>3</sub> CN | 15                 |
| 17    | MnCl <sub>2</sub>                              | --                 | CH <sub>3</sub> CN | trace              |
| 18    | ZnCl <sub>2</sub>                              | --                 | CH <sub>3</sub> CN | 26                 |
| 19    | FeCl <sub>3</sub> ·6H <sub>2</sub> O           | --                 | CH <sub>3</sub> CN | 21                 |
| 20    | AlCl <sub>3</sub>                              | --                 | CH <sub>3</sub> CN | N.D.               |
| 21    | BF <sub>3</sub> ·Et <sub>2</sub> O             | --                 | CH <sub>3</sub> CN | N.D.               |
| 22    | B(C <sub>6</sub> F <sub>5</sub> ) <sub>3</sub> | --                 | CH <sub>3</sub> CN | N.D.               |
| 23    | Fe(phen)Cl <sub>3</sub>                        | DBU                | CH <sub>3</sub> CN | 34                 |
| 24    | Fe(phen)Cl <sub>3</sub>                        | DABCO              | CH <sub>3</sub> CN | 21                 |
| 25    | Fe(phen)Cl <sub>3</sub>                        | TEMPO              | CH <sub>3</sub> CN | 32                 |
| 26    | Fe(phen)Cl <sub>3</sub>                        | HOAc               | CH <sub>3</sub> CN | 53                 |
| 27    | Fe(phen)Cl <sub>3</sub>                        |                    | DMF                | trace              |
| 28    | Fe(phen)Cl <sub>3</sub>                        |                    | MeOH               | N.D.               |

|    |                                      |    |                    |                 |
|----|--------------------------------------|----|--------------------|-----------------|
| 29 | Fe(phen)Cl <sub>3</sub>              |    | DCE                | 22              |
| 30 | Fe(phen)Cl <sub>3</sub>              |    | HFIP               | N.D.            |
| 31 | Fe(phen)Cl <sub>3</sub>              | -- | CH <sub>3</sub> CN | 70 <sup>d</sup> |
| 32 | Fe(phen)Cl <sub>3</sub>              | -- | CH <sub>3</sub> CN | 59 <sup>e</sup> |
| 33 | Fe(phen)Cl <sub>3</sub>              | -- | CH <sub>3</sub> CN | 54 <sup>f</sup> |
| 34 | Fe(phen)Cl <sub>3</sub>              | -- | CH <sub>3</sub> CN | 56 <sup>g</sup> |
| 35 | Fe(phen)Cl <sub>3</sub>              | -- | CH <sub>3</sub> CN | 73 <sup>h</sup> |
| 36 | Fe(phen)Cl <sub>3</sub>              | -- | CH <sub>3</sub> CN | 38 <sup>i</sup> |
| 37 | Fe(phen)Cl <sub>3</sub>              | -- | CH <sub>3</sub> CN | 26 <sup>j</sup> |
| 38 | Fe(phen)Cl <sub>3</sub>              | -- | CH <sub>3</sub> CN | 66 <sup>k</sup> |
| 39 | Fe(phen)Cl <sub>3</sub>              | -- | CH <sub>3</sub> CN | 35 <sup>l</sup> |
| 40 | Fe(phen)Cl <sub>3</sub>              | -- | CH <sub>3</sub> CN | 78 <sup>m</sup> |
| 41 | --                                   | -- | CH <sub>3</sub> CN | trace           |
| 42 | Fe(phen)Cl <sub>3</sub>              | -- | CH <sub>3</sub> CN | 7 <sup>n</sup>  |
| 43 | Fe(phen)Cl <sub>3</sub> (1.0 equiv.) | -- | CH <sub>3</sub> CN | 13 <sup>o</sup> |
| 44 | Fe(phen)Cl <sub>3</sub> (1.0 equiv.) | -- | CH <sub>3</sub> CN | 18 <sup>p</sup> |
| 45 | Fe(phen)Cl <sub>3</sub> (1.0 equiv.) | -- | CH <sub>3</sub> CN | 61 <sup>q</sup> |

<sup>a</sup>Undivided cell, carbon felt anode, Ni plate cathode, constant current = 3.0 mA, **1** (0.3 mmol), **2** (0.36 mmol), catalyst (10 mol %), solvent (5.0 mL), under air, 6 h. <sup>b</sup>Yield of isolated product. <sup>c</sup>N.D. = not detected. <sup>d</sup>2.0 mA. <sup>e</sup>4.0 mA. <sup>f</sup>5.0 mA. <sup>g</sup>Graphite felt cathode. <sup>h</sup>Pt plate cathode. <sup>i</sup>Ni foam cathode. <sup>j</sup>Carbon felt cathode. <sup>k</sup>50 °C. <sup>l</sup>Room temperature. <sup>m</sup>Under Argon. <sup>n</sup>Without electricity. <sup>o</sup>Without electricity, Ar atmosphere. <sup>p</sup>Without electricity, air condition. <sup>q</sup>Without electricity, O<sub>2</sub> atmosphere.

### Optimization of Ligands

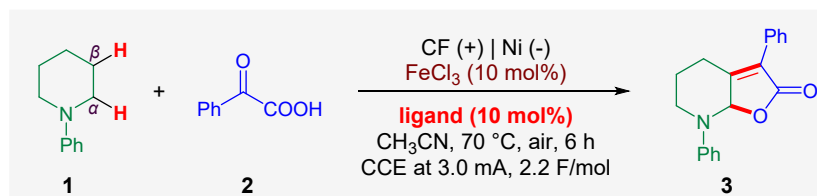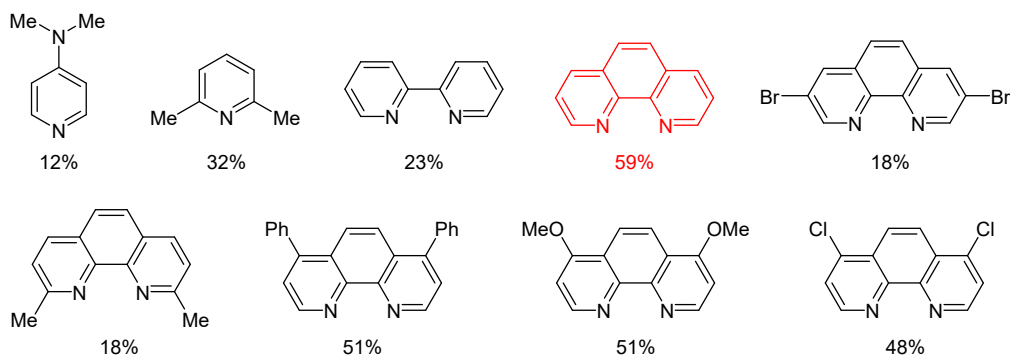

Failed substrates:

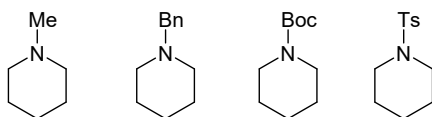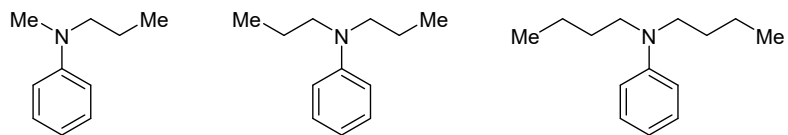

The above amines were tested, however, no desired products were afforded under the standard conditions.

## General Procedure of the Electrochemical Dual C(sp<sup>3</sup>)-H Functionalization

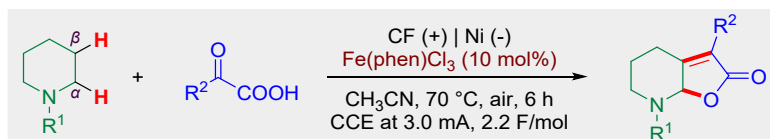

The electrocatalysis was carried out in an undivided cell with a carbon felt anode (10 mm × 15 mm × 3 mm) and a nickel cathode (10 mm × 15 mm × 0.2 mm). To a 15 mL pre-dried undivided electrochemical cell (15 mL) equipped with a magnetic bar was added cyclic *N*-aryl amines (0.30 mmol, 1.0 equiv.),  $\alpha$ -aryl keto acids (0.36 mmol, 1.2 equiv.) and Fe(phen)Cl<sub>3</sub> (10.3 mg, 0.03 mmol, 10 mol%), followed by CH<sub>3</sub>CN (5.0 mL). The electrocatalysis was performed at 70 °C with a constant current at 3.0 mA and maintained for 6 h. The carbon felt anode was washed with DCM (3 × 5 mL) in an ultrasonic bath. Evaporation of the solvent and subsequent column chromatography on silica gel afforded the corresponding products.

The consumed charge for the reaction is calculated by the following formula:

$$F/mol = \frac{i(A) \times t(s)}{x(mol) \times 10^{-3} \times 96500}$$

The efficiency of the reaction is calculated by the following formula:

$$\eta = \frac{x(mol) \times n \times 96500}{i(A) \times t(s)} \times 100\%$$

The current efficiency of each product is listed below:

|        |        |        |        |        |        |        |        |        |
|--------|--------|--------|--------|--------|--------|--------|--------|--------|
| 3 72%  | 4 72%  | 5 77%  | 6 72%  | 7 37%  | 8 35%  | 9 23%  | 10 37% | 11 67% |
| 12 58% | 13 38% | 14 7%  | 15 15% | 16 59% | 17 52% | 18 53% | 19 60% | 20 68% |
| 21 67% | 22 53% | 23 28% | 24 57% | 25 64% | 26 58% | 27 40% | 28 53% | 29 70% |
| 30 63% | 31 56% | 32 46% | 33 33% | 34 31% | 35 35% | 36 63% | 37 67% | 38 61% |
| 39 6%  | 40 7%  |        |        |        |        |        |        |        |



## Graphical Guide

*Pictur*

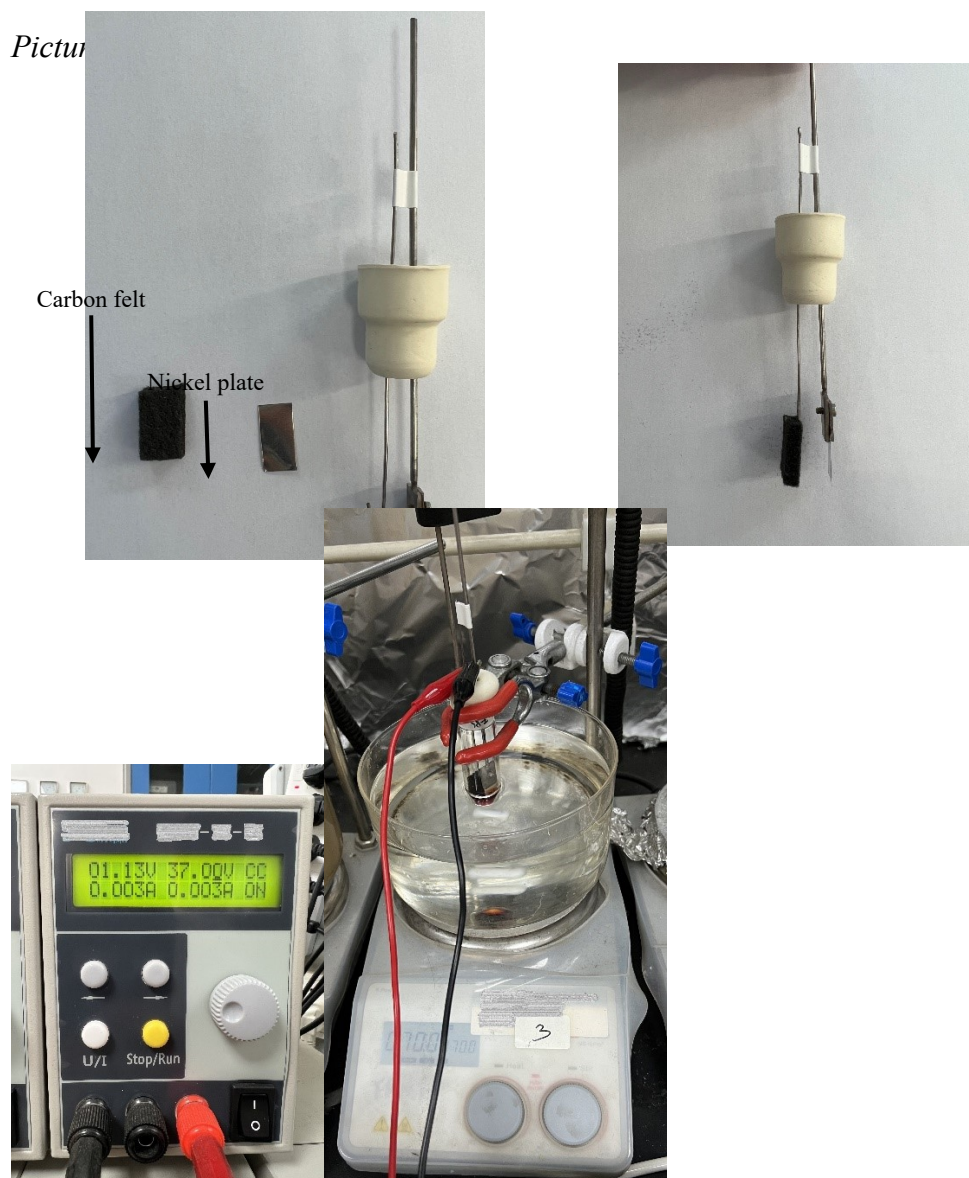

Nickel electrodes (10 mm × 15 mm × 0.2 mm) and carbon felt electrodes (10 mm × 15 mm × 3 mm) were connected using stainless steel adapters. Electrocatalysis was conducted using an HSPY-36-03 potentiostat in constant current mode. The exact measurement of the reaction tube was 19 mm × 22 mm for the ground neck, 22 mm × 90 mm for outer diameter and length, and the volume was 10 mL. The space between of two electrodes was about 1 cm, and the rotation of the reaction was 800 rpm.

## Characterization Data of Products

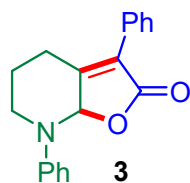

### 3,7-Diphenyl-5,6,7,7a-tetrahydrofuro[2,3-*b*]pyridin-2(4*H*)-one (**3**)

Compound **3** was prepared following the general procedure, purification by column chromatography on silica gel (petroleum ether/EtOAc = 20:1) yielded **3** (69.9 mg, 80%) as a reddish solid. M.p.: 170 – 171 °C. <sup>1</sup>H NMR (400 MHz, Chloroform-*d*) δ = 7.56 – 7.54 (m, 2H), 7.49 – 7.40 (m, 3H), 7.36 – 7.32 (m, 2H), 7.20 – 7.18 (m, 2H), 7.02 (t, *J* = 7.2 Hz, 1H), 5.84 (s, 1H), 3.41 (t, *J* = 5.6 Hz, 2H), 3.25 – 3.07 (m, 1H), 2.68 – 2.50 (m, 1H), 2.16 – 2.01 (m, 1H), 1.95 – 1.80 (m, 1H). <sup>13</sup>C NMR (100 MHz, Chloroform-*d*) δ = 171.0, 157.4, 148.1, 129.3, 129.3, 129.1, 129.0, 128.6, 127.7, 122.0, 117.8, 90.2, 46.8, 24.3, 23.8. HR-MS (ESI) *m/z* calc. for C<sub>19</sub>H<sub>18</sub>NO<sub>2</sub> [M+H]<sup>+</sup>: 292.1332, found: 292.1336. The analytical data correspond with those reported in the literature.<sup>[4]</sup>

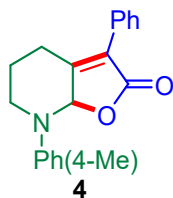

### 3-Phenyl-7-(*p*-tolyl)-5,6,7,7a-tetrahydrofuro[2,3-*b*]pyridin-2(4*H*)-one (**4**)

Compound **4** was prepared following the general procedure, purification by column chromatography on silica gel (petroleum ether/EtOAc = 20:1) yielded **4** (74.2 mg, 81%) as a yellow solid. M.p.: 146 – 147 °C. <sup>1</sup>H NMR (400 MHz, Chloroform-*d*): δ = 7.55 – 7.53 (m, 2H), 7.48 – 7.39 (m, 3H), 7.16 – 7.10 (m, 4H), 5.73 (s, 1H), 3.36 (t, *J* = 6.0 Hz, 2H), 3.24 – 2.95 (s, 1H), 2.79 – 2.48 (s, 1H), 2.32 (s, 3H), 2.14 – 1.78 (m, 2H). <sup>13</sup>C NMR (100 MHz, Chloroform-*d*): δ = 171.0, 157.7, 146.0, 132.0, 129.8, 129.3, 129.1, 128.9, 128.6, 127.3, 118.6, 90.4, 48.0, 24.6, 24.2, 20.6. HR-MS (ESI) *m/z* calc. for C<sub>20</sub>H<sub>20</sub>NO<sub>2</sub> [M+H]<sup>+</sup>: 306.1489, found: 306.1492. The analytical data correspond with those reported in the literature.<sup>[4]</sup>

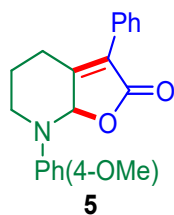

**7-(4-Methoxyphenyl)-3-phenyl-5,6,7,7a-tetrahydrofuro[2,3-*b*]pyridin-2(4*H*)-one (5)**

Compound **5** was prepared following the general procedure, purification by column chromatography on silica gel (petroleum ether/EtOAc = 15:1) yielded **5** (40.5 mg, 86%) as a white solid. M.p.: 140 – 141 °C. <sup>1</sup>H NMR (400 MHz, Chloroform-*d*): δ = 7.54 – 7.52 (m, 2H), 7.47 – 7.38 (m, 3H), 7.20 – 7.16 (m, 2H), 6.91 – 6.87 (m, 2H), 5.55 (s, 1H), 3.79 (s, 3H), 3.52 – 2.28 (m, 4H), 2.10 – 1.82 (s, 2H). <sup>13</sup>C NMR (100 MHz, Chloroform-*d*): δ = 171.1, 158.3, 155.9, 142.2, 129.4, 129.1, 128.9, 128.6, 126.6, 121.6, 114.5, 90.6, 55.6, 50.0, 25.1, 24.9. HR-MS (ESI) *m/z* calc. for C<sub>20</sub>H<sub>20</sub>NO<sub>3</sub> [M+H]<sup>+</sup>: 322.1438, found: 322.1437. The analytical data correspond with those reported in the literature.<sup>[4]</sup>

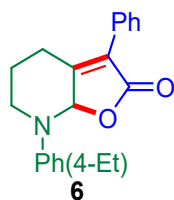

**7-(4-Ethylphenyl)-3-phenyl-5,6,7,7a-tetrahydrofuro[2,3-*b*]pyridin-2(4*H*)-one (6)**

Compound **6** was prepared following the general procedure, purification by column chromatography on silica gel (petroleum ether/EtOAc = 20:1) yielded **6** (27.5 mg, 80%) as a yellow solid. M.p.: 131 – 132 °C. <sup>1</sup>H NMR (400 MHz, Methanol-*d*<sub>4</sub>) δ = 7.53 – 7.51 (m, 2H), 7.49 – 7.45 (m, 2H), 7.44 – 7.42 (m, 1H), 7.19 – 7.14 (m, 4H), 5.86 (s, 1H), 3.36 – 3.33 (m, 2H), 2.88 (t, *J* = 6.8 Hz, 2H), 2.61 (q, *J* = 7.6 Hz, 2H), 1.97 – 1.91 (m, 2H), 1.22 (t, *J* = 7.6 Hz, 3H). <sup>13</sup>C NMR (150 MHz, Methanol-*d*<sub>4</sub>) δ = 171.9, 159.8, 146.6, 138.8, 129.4, 128.8, 128.5, 128.2, 128.1, 126.2, 119.3, 90.7, 49.0, 27.7, 24.5, 24.0, 14.9. HR-MS (ESI) *m/z* calc. for C<sub>21</sub>H<sub>22</sub>NO<sub>2</sub> [M+H]<sup>+</sup>: 320.1645, found: 320.1641.

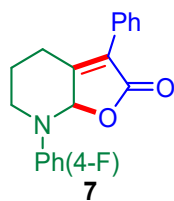

### 7-(4-Fluorophenyl)-3-phenyl-5,6,7,7a-tetrahydrofuro[2,3-*b*]pyridin-2(4*H*)-one (**7**)

Compound **7** was prepared following the general procedure with constant current at 5.0 mA, purification by column chromatography on silica gel (petroleum ether/EtOAc = 20:1) yielded **7** (63.9 mg, 69%) as a white solid. M.p.: 163 – 164 °C. <sup>1</sup>H NMR (400 MHz, Chloroform-*d*) δ = 7.55 – 7.53 (m, 2H), 7.48 – 7.39 (m, 3H), 7.19 – 7.16 (m, 2H), 7.06 – 7.01 (m, 2H), 5.63 (s, 1H), 3.38 – 3.28 (m, 2H), 3.23 – 3.10 (m, 1H), 2.65 – 2.48 (s, 1H), 2.15 – 1.99 (m, 1H), 1.96 – 1.79 (m, 1H). <sup>13</sup>C NMR (100 MHz, Chloroform-*d*) δ = 170.9, 158.9 (d, <sup>1</sup>J<sub>C-F</sub> = 240.2 Hz), 157.7, 144.6 (d, <sup>4</sup>J<sub>C-F</sub> = 2.6 Hz), 129.2, 129.1, 129.0, 128.7, 127.1, 121.0 (d, <sup>3</sup>J<sub>C-F</sub> = 7.9 Hz), 115.8 (d, <sup>2</sup>J<sub>C-F</sub> = 22.1 Hz), 90.2, 49.2, 24.8, 24.5. <sup>19</sup>F NMR (375 MHz, Chloroform-*d*) δ = – 110.2. HR-MS (ESI) m/z calc. for C<sub>19</sub>H<sub>17</sub>FNO<sub>2</sub> [M+H]<sup>+</sup>: 310.1238, found: 310.1244.

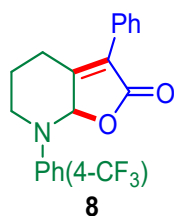

### 3-Phenyl-7-(4-(trifluoromethyl)phenyl)-5,6,7,7a-tetrahydrofuro[2,3-*b*]pyridin-2(4*H*)-one (**8**)

Compound **8** was prepared following the general procedure with constant current at 5.0 mA, purification by column chromatography on silica gel (petroleum ether/EtOAc = 20:1) yielded **8** (71.1 mg, 66%) as a light-yellow solid. M.p.: 154 – 155 °C. <sup>1</sup>H NMR (400 MHz, Chloroform-*d*) δ = 7.58 – 7.55 (m, 4H), 7.50 – 7.41 (m, 3H), 7.20 – 7.18 (m, 2H), 5.95 (s, 1H), 3.61 – 3.55 (m, 1H), 3.40 – 3.33 (m, 1H), 3.23 – 3.16 (m, 1H), 2.69 – 2.61 (m, 1H), 2.19 – 2.08 (m, 1H), 1.96 – 1.87 (m, 1H). <sup>13</sup>C NMR (100 MHz, Chloroform-*d*) δ = 170.6, 156.4, 150.3, 129.2, 129.1, 129.0, 128.7, 128.5, 126.6 (q, <sup>4</sup>J<sub>C-F</sub> = 3.6 Hz), 124.5 (q, <sup>1</sup>J<sub>C-F</sub> = 269.4 Hz), 122.8 (q, <sup>2</sup>J<sub>C-F</sub> = 32.6 Hz), 115.8, 89.2, 44.9, 23.7, 23.0. <sup>19</sup>F NMR (375 MHz, Chloroform-*d*) δ = – 61.6. MS (ESI) m/z calc. for

C<sub>20</sub>H<sub>17</sub>F<sub>3</sub>NO<sub>2</sub> [M+H]<sup>+</sup>: 360.1206, found: 360.1200.

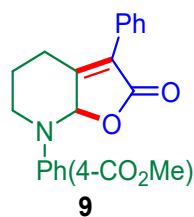

**Methyl 4-(2-oxo-3-phenyl-2,5,6,7a-tetrahydrofuro[2,3-b]pyridin-7(4H)-yl)benzoate (9)**

Compound **9** was prepared following the general procedure with constant current at 7.0 mA, purification by column chromatography on silica gel (petroleum ether/EtOAc = 15:1) yielded **9** (63.9 mg, 61%) as a white solid. M.p.: 154 – 155 °C. <sup>1</sup>H NMR (400 MHz, Chloroform-*d*) δ = 8.00 – 7.98 (m, 2H), 7.56 – 7.54 (m, 2H), 7.48 – 7.40 (m, 3H), 7.11 – 7.09 (m, 2H), 6.01 (s, 1H), 3.88 (s, 3H), 3.67 – 3.61 (m, 1H), 3.34 – 3.27 (m, 1H), 3.20 – 3.12 (m, 1H), 2.69 – 2.62 (m, 1H), 2.18 – 2.07 (m, 1H), 1.94 – 1.85 (m, 1H). <sup>13</sup>C NMR (100 MHz, Chloroform-*d*) δ = 170.7, 166.9, 156.4, 151.2, 131.3, 129.2, 129.1, 129.0, 128.7, 128.6, 122.0, 114.7, 89.1, 51.8, 44.0, 23.4, 22.7. HR-MS (ESI) *m/z* calc. for C<sub>21</sub>H<sub>20</sub>NO<sub>4</sub> [M+H]<sup>+</sup>: 350.1387, found: 350.1391.

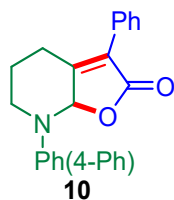

**7-([1,1'-Biphenyl]-4-yl)-3-phenyl-5,6,7,7a-tetrahydrofuro[2,3-b]pyridin-2(4H)-one (10)**

Compound **10** was prepared following the general procedure with constant current at 5.0 mA, purification by column chromatography on silica gel (petroleum ether/EtOAc = 20:1) yielded **10** (74.9 mg, 68%) as a reddish solid. M.p.: 164 – 165 °C. <sup>1</sup>H NMR (400 MHz, Chloroform-*d*) δ = 7.58 – 7.54 (m, 6H), 7.48 – 7.40 (m, 5H), 7.33 – 7.29 (t, *J* = 7.4 Hz, 1H), 7.24 – 7.22 (m, 2H), 5.86 (s, 1H), 3.45 – 3.41 (m, 2H), 3.25 – 3.08 (m, 1H), 2.69 – 2.49 (m, 1H), 2.20 – 2.02 (m, 1H), 1.97 – 1.79 (m, 1H). <sup>13</sup>C NMR (100 MHz, Chloroform-*d*) δ = 171.0, 157.3, 147.4, 140.6, 134.7, 129.3, 129.1, 129.0, 128.8, 128.7, 127.9, 127.7, 126.8, 126.7, 117.9, 90.0, 46.7, 24.3, 23.7. HR-MS (ESI) *m/z* calc.

for  $C_{25}H_{22}NO_2$   $[M+H]^+$ : 368.1645, found: 368.1651.

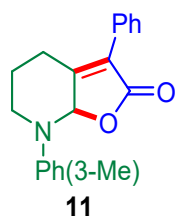

### 3-Phenyl-7-(*m*-tolyl)-5,6,7,7a-tetrahydrofuro[2,3-*b*]pyridin-2(4*H*)-one (11)

Compound **11** was prepared following the general procedure, purification by column chromatography on silica gel (petroleum ether/EtOAc = 20:1) yielded **11** (68.6 mg, 75%) as a white solid. M.p.: 150 – 151 °C.  $^1H$  NMR (400 MHz, Chloroform-*d*)  $\delta$  = 7.56 – 7.54 (m, 2H), 7.49 – 7.40 (m, 3H), 7.23 (t,  $J$  = 8.0 Hz, 1H), 7.01 – 6.97 (m, 2H), 6.85 (d,  $J$  = 7.6 Hz, 1H), 5.84 (s, 1H), 3.47 – 3.32 (m, 2H), 3.27 – 3.00 (m, 1H), 2.69 – 2.49 (m, 1H), 2.37 (s, 3H), 2.17 – 1.99 (m, 1H), 1.97 – 1.78 (m, 1H).  $^{13}C$  NMR (100 MHz, Chloroform-*d*)  $\delta$  = 171.1, 157.5, 148.1, 139.2, 129.3, 129.1, 129.0, 128.6, 127.7, 122.8, 118.5, 114.7, 90.4, 46.7, 24.3, 23.7, 21.8. HR-MS (ESI)  $m/z$  calc. for  $C_{20}H_{20}NO_2$   $[M+H]^+$ : 306.1489 found: 306.1490.

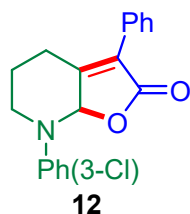

### 7-(3-Chlorophenyl)-3-phenyl-5,6,7,7a-tetrahydrofuro[2,3-*b*]pyridin-2(4*H*)-one (12)

Compound **12** was prepared following the general procedure, purification by column chromatography on silica gel (petroleum ether/EtOAc = 20:1) yielded **12** (63.4 mg, 65%) as a white solid. M.p.: 152 – 152 °C.  $^1H$  NMR (400 MHz, Chloroform-*d*)  $\delta$  = 7.55 – 7.54 (m, 2H), 7.49 – 7.40 (m, 3H), 7.26 – 7.22 (m, 1H), 7.14 (t,  $J$  = 2.4 Hz, 1H), 7.05 (dd,  $J$  = 8.0, 2.4 Hz, 1H), 6.97 (d,  $J$  = 8.0 Hz, 1H), 5.83 (s, 1H), 3.47 – 3.32 (m, 2H), 3.21 – 3.14 (m, 1H), 2.64 – 2.56 (m, 1H), 2.15 – 2.06 (m, 1H), 1.92 – 1.83 (m, 1H).  $^{13}C$  NMR (100 MHz, Chloroform-*d*)  $\delta$  = 170.8, 156.9, 149.2, 135.1, 130.3, 129.1, 129.08, 128.7, 128.0, 121.6, 117.3, 115.5, 89.6, 46.2, 24.0, 23.5. HR-MS (ESI)  $m/z$  calc. for  $C_{19}H_{17}^{35}ClNO_2$   $[M+H]^+$ : 326.0942, found: 326.0937.

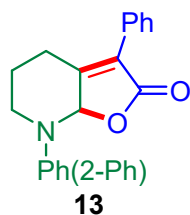

**7-([1,1'-Biphenyl]-2-yl)-3-phenyl-5,6,7,7a-tetrahydrofuro[2,3-*b*]pyridin-2(4*H*)-one (13)**

Compound **13** was prepared following the general procedure, purification by column chromatography on silica gel (petroleum ether/EtOAc = 20:1) yielded **13** (47.4 mg, 43%) as a reddish solid. M.p.: 203 – 204 °C. <sup>1</sup>H NMR (400 MHz, Chloroform-*d*) δ = 7.51 – 7.50 (m, 4H), 7.47 – 7.39 (m, 4H), 7.38 – 7.30 (m, 4H), 7.28 – 7.20 (m, 2H), 5.73 (s, 1H), 2.85 – 2.42 (m, 4H), 1.56 – 1.26 (m, 2H). <sup>13</sup>C NMR (100 MHz, Chloroform-*d*) δ = 171.2, 159.3, 146.0, 140.2, 137.7, 131.5, 129.5, 129.3, 129.0, 128.8, 128.6, 128.2, 128.0, 126.9, 125.5, 125.0, 120.7, 88.8, 51.2, 25.3, 25.2. HR-MS (ESI) *m/z* calc. for C<sub>25</sub>H<sub>22</sub>NO<sub>2</sub> [M+H]<sup>+</sup>: 368.1645, found: 368.1644. The analytical data correspond with those reported in the literature.<sup>[4]</sup>

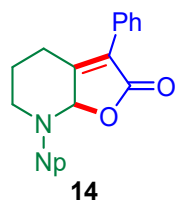

**7-(Naphthalen-1-yl)-3-phenyl-5,6,7,7a-tetrahydrofuro[2,3-*b*]pyridin-2(4*H*)-one (14)**

Compound **14** was prepared following the general procedure with constant current at 5.0 mA for 24 h, purification by column chromatography on silica gel (petroleum ether/EtOAc = 20:1) yielded **14** (54.2 mg, 53%) as a white solid. M.p.: 182 – 183 °C. <sup>1</sup>H NMR (400 MHz, Chloroform-*d*) δ = 8.21 – 8.18 (m, 1H), 7.86 – 7.84 (m, 1H), 7.71 – 7.69 (m, 1H), 7.59 – 7.57 (m, 2H), 7.49 – 7.40 (m, 7H), 5.86 (s, 1H), 3.57 – 3.42 (m, 1H), 3.39 – 3.24 (m, 1H), 3.06 – 2.90 (m, 1H), 2.72 – 2.52 (m, 1H), 2.06 – 2.03 (m, 2H). <sup>13</sup>C NMR (100 MHz, Chloroform-*d*) δ = 171.2, 159.1, 145.3, 134.8, 130.3, 129.5, 129.0, 128.8, 128.6, 128.2, 126.1, 126.0, 125.6, 125.5, 123.3, 116.8, 89.4, 53.2, 25.9. HR-MS (ESI) *m/z* calc. for C<sub>23</sub>H<sub>20</sub>NO<sub>2</sub> [M+H]<sup>+</sup>: 342.1489, found: 342.1492.

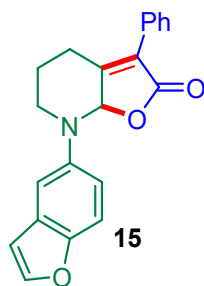

**7-(Benzofuran-5-yl)-3-phenyl-5,6,7,7a-tetrahydrofuro[2,3-*b*]pyridin-2(4*H*)-one**  
**(15)**

Compound **15** was prepared following the general procedure for 24 h, purification by column chromatography on silica gel (petroleum ether/EtOAc = 20:1) yielded **16** (64.5 mg, 65%) as a yellow solid. M.p.: 146 – 147 °C. <sup>1</sup>H NMR (400 MHz, Chloroform-*d*) δ = 7.62 (d, *J* = 2.0 Hz, 1H), 7.55 – 7.54 (m, 2H), 7.49 – 7.39 (m, 5H), 7.21 (dd, *J* = 9.2, 2.4 Hz, 1H), 6.74 (d, *J* = 2.0 Hz, 1H), 5.67 (s, 1H), 3.51 – 3.29 (m, 2H), 3.29 – 2.97 (m, 1H), 2.78 – 2.38 (m, 1H), 2.16 – 1.86 (m, 2H). <sup>13</sup>C NMR (100 MHz, Chloroform-*d*) δ = 171.1, 158.1, 151.7, 145.8, 144.4, 129.4, 129.1, 128.9, 128.6, 128.0, 126.8, 118.2, 112.3, 111.7, 106.8, 90.8, 50.4, 25.1, 24.8. HR-MS (ESI) *m/z* calc. for C<sub>21</sub>H<sub>18</sub>NO<sub>3</sub> [M+H]<sup>+</sup>: 332.1281, found: 332.1287.

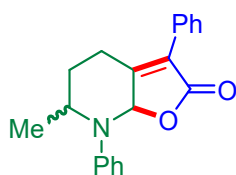

**16**, d.r. = 3:1

**(7a*R*)-6-Methyl-3,7-diphenyl-5,6,7,7a-tetrahydrofuro[2,3-*b*]pyridin-2(4*H*)-one**  
**(16)**

Compound **16** was prepared following the general procedure, purification by column chromatography on silica gel (petroleum ether/EtOAc = 20:1) yielded **16** (60.4 mg, 66%, d.r. = 3:1) as a white solid. M.p.: 155 – 156 °C. <sup>1</sup>H NMR (800 MHz, Chloroform-*d*) δ = 7.61 – 7.51 (m, 2H), 7.47 – 7.45 (m, 2H), 7.41 (t, *J* = 7.2 Hz, 1H), 7.36 – 7.34 (m, 2H), 7.22 – 7.21 (m, 2H), 7.14 – 7.06 (m, 1H), 6.00 (s, 0.3H), 5.81 (s, 1H), 3.81 – 3.68 (s, 1H), 3.21 – 3.04 (m, 1H), 2.84 – 2.76 (m, 0.3 H), 2.76 – 2.65 (m, 1H), 2.19 – 2.11 (m, 1H), 2.00 – 1.89 (m, 0.3 H), 1.76 – 1.66 (m, 1H), 1.15 – 0.93 (m, 4H). HR-MS (ESI) *m/z* calc. for C<sub>20</sub>H<sub>20</sub>NO<sub>2</sub> [M+H]<sup>+</sup>: 306.1489, found: 306.1488.



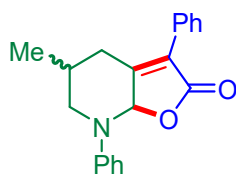

**17**, d.r. = 1.67:1

**(7aR)-5-Methyl-3,7-diphenyl-5,6,7,7a-tetrahydrofuro[2,3-*b*]pyridin-2(4H)-one (17)**

Compound **17** was prepared following the general procedure, purification by column chromatography on silica gel (petroleum ether/EtOAc = 20:1) yielded **17** (53.1 mg, 58%, d.r. = 1.67:1) as a white solid. M.p.: 151 – 152 °C. <sup>1</sup>H NMR (400 MHz, Chloroform-*d*) δ = 7.56 – 7.54 (m, 4H), 7.49 – 7.40 (m, 6H), 7.36 – 7.32 (m, 4H), 7.24 – 7.05 (m, 5H), 5.98 (s, 0.6H), 5.69 (s, 1H), 3.52 (d, *J* = 13.2 Hz, 2H), 3.28 – 3.14 (m, 1H), 2.94 (dd, *J* = 13.2, 9.2 Hz, 2H), 2.76 – 2.60 (m, 0.6H), 2.49 – 2.34 (m, 0.6H), 2.23 – 2.03 (m, 2H), 1.11 – 1.00 (m, 5H). HR-MS (ESI) *m/z* calc. for C<sub>20</sub>H<sub>20</sub>NO<sub>2</sub> [M+H]<sup>+</sup>: 306.1489, found: 306.1486.

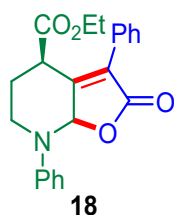

**Ethyl (4R)-2-oxo-3,7-diphenyl-2,4,5,6,7,7a-hexahydrofuro[2,3-*b*]pyridine-4-carboxylate (18)**

Compound **18** was prepared following the general procedure, purification by column chromatography on silica gel (petroleum ether/EtOAc = 15:1) yielded **18** (64.3 mg, 59%) as a yellowish solid. M.p.: 173 – 174 °C. <sup>1</sup>H NMR (400 MHz, Chloroform-*d*) δ = 7.61 – 7.58 (m, 2H), 7.51 – 7.45 (m, 3H), 7.36 – 7.32 (m, 2H), 7.17 – 7.15 (m, 2H), 7.01 (t, *J* = 7.2 Hz, 1H), 6.11 (s, 1H), 4.26 (q, *J* = 7.2 Hz, 2H), 4.14 (dd, *J* = 8.4, 4.0 Hz, 1H), 3.59 – 3.53 (m, 1H), 3.33 – 3.27 (m, 1H), 2.48 – 2.40 (m, 1H), 2.18 – 2.10 (m, 1H), 1.28 (t, *J* = 7.2 Hz, 3H). <sup>13</sup>C NMR (100 MHz, Chloroform-*d*) δ = 170.8, 170.5, 152.7, 147.6, 130.7, 129.6, 129.4, 129.2, 128.8, 128.6, 121.9, 117.3, 89.6, 62.2, 44.1, 40.6, 28.2, 14.2. HR-MS (ESI) *m/z* calc. for C<sub>22</sub>H<sub>22</sub>NO<sub>4</sub> [M+H]<sup>+</sup>: 364.1543, found: 364.1544.

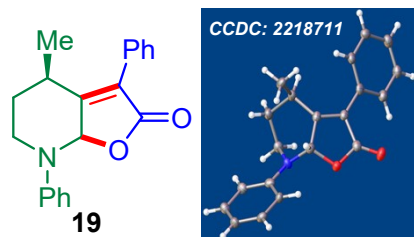

**(4*R*)-4-Methyl-3,7-diphenyl-5,6,7,7a-tetrahydrofuro[2,3-*b*]pyridin-2(4*H*)-one (19)**

Compound **19** was prepared following the general procedure, purification by column chromatography on silica gel (petroleum ether/EtOAc = 20:1) yielded **19** (61.4 mg, 67%) as a white solid. M.p.: 162 – 163 °C. <sup>1</sup>H NMR (400 MHz, Chloroform-*d*) δ = 7.55 – 7.53 (m, 2H), 7.49 – 7.40 (m, 3H), 7.36 – 7.32 (m, 2H), 7.18 – 7.16 (m, 2H), 7.00 (t, *J* = 7.2 Hz, 1H), 6.04 (s, 1H), 3.60 – 3.54 (m, 1H), 3.44 – 3.36 (m, 1H), 3.31 – 3.24 (m, 1H), 2.16 – 2.08 (m, 1H), 1.81 – 1.73 (m, 1H), 1.40 (d, *J* = 7.2 Hz, 3H). <sup>13</sup>C NMR (100 MHz, Chloroform-*d*) δ = 171.1, 161.5, 147.7, 129.4, 129.0, 128.7, 127.8, 121.4, 116.7, 88.7, 43.7, 32.1, 28.6, 20.3. HR-MS (ESI) *m/z* calc. for C<sub>20</sub>H<sub>20</sub>NO<sub>2</sub> [M+H]<sup>+</sup>: 306.1489, found: 306.1485. The analytical data correspond with those reported in the literature.<sup>[4]</sup>

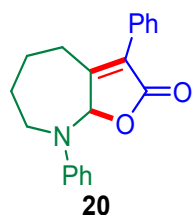

**3,8-Diphenyl-4,5,6,7,8,8a-hexahydro-2*H*-furo[2,3-*b*]azepin-2-one (20)**

Compound **20** was prepared following the general procedure, purification by column chromatography on silica gel (petroleum ether/EtOAc = 20:1) yielded **20** (69.9 mg, 76%) as a yellowish solid. M.p.: 153 – 154 °C. <sup>1</sup>H NMR (400 MHz, Chloroform-*d*) δ = 7.58 – 7.55 (m, 2H), 7.48 – 7.44 (m, 2H), 7.42 – 7.38 (m, 1H), 7.33 – 7.29 (m, 2H), 7.09 – 7.07 (m, 2H), 6.94 (t, *J* = 7.2 Hz, 1H), 6.26 (s, 1H), 3.56 – 3.52 (m, 1H), 3.32 – 3.25 (m, 1H), 3.10 – 3.05 (m, 1H), 2.40 – 2.33 (m, 1H), 2.11 – 2.05 (m, 1H), 1.93 – 1.87 (m, 2H), 1.64 – 1.53 (m, 1H). <sup>13</sup>C NMR (150 MHz, Chloroform-*d*) δ = 172.0, 159.2, 148.0, 129.7, 129.6, 129.4, 128.9, 128.8, 128.7, 120.2, 114.7, 93.9, 46.7, 29.1, 28.3, 26.7. HR-MS (ESI) *m/z* calc. for C<sub>20</sub>H<sub>20</sub>NO<sub>2</sub> [M+H]<sup>+</sup>: 306.1489, found: 306.1496. The analytical data correspond with those reported in the literature.<sup>[4]</sup>

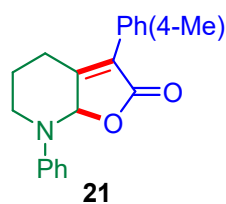

### 7-Phenyl-3-(*p*-tolyl)-5,6,7,7a-tetrahydrofuro[2,3-*b*]pyridin-2(4*H*)-one (**21**)

Compound **21** was prepared following the general procedure, purification by column chromatography on silica gel (petroleum ether/EtOAc = 20:1) yielded **21** (68.6 mg, 75%) as a reddish solid. M.p.: 183 – 184 °C. <sup>1</sup>H NMR (400 MHz, Chloroform-*d*) δ = 7.45 – 7.43 (m, 2H), 7.35 – 7.31 (m, 2H), 7.28 – 7.26 (m, 2H), 7.18 – 7.16 (m, 2H), 7.01 (t, *J* = 7.2 Hz, 1H), 5.81 (s, 1H), 3.39 (t, *J* = 6.0 Hz, 2H), 3.22 – 3.02 (m, 1H), 2.68 – 2.46 (m, 1H), 2.39 (s, 3H), 2.14 – 1.99 (m, 1H), 1.95 – 1.80 (m, 1H). <sup>13</sup>C NMR (100 MHz, Chloroform-*d*) δ = 171.2, 156.7, 148.1, 139.0, 129.34, 129.31, 129.0, 127.6, 126.4, 121.9, 117.7, 90.2, 46.7, 24.2, 23.8, 21.4. HR-MS (ESI) *m/z* calc. for C<sub>20</sub>H<sub>20</sub>NO<sub>2</sub> [M+H]<sup>+</sup>: 306.1489, found: 306.1487.

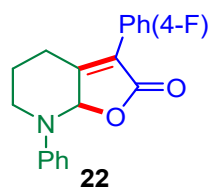

### 3-(4-Fluorophenyl)-7-phenyl-5,6,7,7a-tetrahydrofuro[2,3-*b*]pyridin-2(4*H*)-one (**22**)

Compound **22** was prepared following the general procedure, purification by column chromatography on silica gel (petroleum ether/EtOAc = 10:1) yielded **22** (54.7 mg, 59%) as a reddish solid. M.p.: 167 – 168 °C. <sup>1</sup>H NMR (400 MHz, Chloroform-*d*) δ = 7.56 – 7.53 (m, 2H), 7.36 – 7.32 (m, 2H), 7.19 – 7.14 (m, 4H), 7.03 (t, *J* = 7.2 Hz, 1H), 5.83 (s, 1H), 3.50 – 3.34 (m, 2H), 3.23 – 2.98 (m, 1H), 2.72 – 2.45 (m, 1H), 2.23 – 2.03 (m, 1H), 1.97 – 1.80 (m, 1H). <sup>13</sup>C NMR (100 MHz, Chloroform-*d*) δ = 170.9, 163.0 (d, <sup>1</sup>*J*<sub>C-F</sub> = 248.1 Hz), 157.2, 148.0, 131.0 (d, <sup>3</sup>*J*<sub>C-F</sub> = 8.2 Hz), 129.3, 126.8, 125.3 (d, <sup>4</sup>*J*<sub>C-F</sub> = 3.2 Hz), 122.1, 117.8, 115.8 (d, <sup>2</sup>*J*<sub>C-F</sub> = 21.6 Hz), 90.2, 46.8, 24.3, 23.8. <sup>19</sup>F NMR (375 MHz, Chloroform-*d*) δ = – 110.1. HR-MS (ESI) *m/z* calc. for C<sub>19</sub>H<sub>17</sub>FNO<sub>2</sub> [M+H]<sup>+</sup>: 310.1238, found: 310.1233.

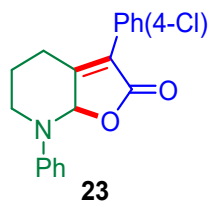

**3-(4-Chlorophenyl)-7-phenyl-5,6,7,7a-tetrahydrofuro[2,3-*b*]pyridin-2(4*H*)-one**  
(**23**)

Compound **23** was prepared following the general procedure with constant current at 5.0 mA, purification by column chromatography on silica gel (petroleum ether/EtOAc = 10:1) yielded **23** (50.7 mg, 52%) as a reddish solid. M.p.: 156 – 157 °C. <sup>1</sup>H NMR (400 MHz, Methanol-*d*<sub>4</sub>) δ = 7.60 – 7.55 (m, 4H), 7.35 – 7.31 (m, 2H), 7.18 – 7.16 (m, 2H), 6.97 (t, *J* = 7.2 Hz, 1H), 6.11 (s, 1H), 3.45 – 3.35 (m, 2H), 3.04 – 2.86 (m, 1H), 2.81 – 2.63 (m, 1H), 2.07 – 1.93 (m, 1H), 1.88 – 1.71 (m, 1H). <sup>13</sup>C NMR (100 MHz, Methanol-*d*<sub>4</sub>) δ = 170.8, 160.9, 148.7, 134.0, 131.2, 129.5, 129.1, 128.6, 124.9, 121.6, 117.9, 89.8, 47.1, 24.3, 23.9, HR-MS (ESI) *m/z* calc. for C<sub>19</sub>H<sub>17</sub><sup>35</sup>ClNO<sub>2</sub> [M+H]<sup>+</sup>: 326.0942, found: 326.0940. The analytical data correspond with those reported in the literature.<sup>[4]</sup>

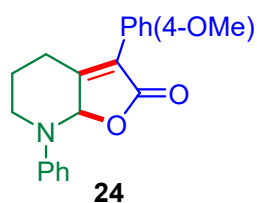

**3-(4-Methoxyphenyl)-7-phenyl-5,6,7,7a-tetrahydrofuro[2,3-*b*]pyridin-2(4*H*)-one**  
(**24**)

Compound **24** was prepared following the general procedure, purification by column chromatography on silica gel (petroleum ether/EtOAc = 5:1) yielded **24** (61.6 mg, 64%) as a reddish solid. M.p.: 171 – 172 °C. <sup>1</sup>H NMR (400 MHz, Chloroform-*d*) δ = 7.52 – 7.50 (m, 2H), 7.36 – 7.32 (m, 2H), 7.18 – 7.16 (m, 2H), 7.03 – 6.98 (m, 3H), 5.83 (s, 1H), 3.85 (s, 3H), 3.50 – 3.34 (m, 2H), 3.24 – 3.04 (m, 1H), 2.69 – 2.49 (m, 1H), 2.16 – 1.99 (m, 1H), 1.98 – 1.78 (m, 1H). <sup>13</sup>C NMR (100 MHz, Chloroform-*d*) δ = 171.3, 160.1, 155.6, 148.1, 130.5, 129.3, 127.2, 121.8, 121.7, 117.6, 114.1, 90.2, 55.4, 46.6, 24.2, 23.7. HR-MS (ESI) *m/z* calc. for C<sub>20</sub>H<sub>20</sub>NO<sub>3</sub> [M+H]<sup>+</sup>: 322.1438, found: 322.1441.

The analytical data correspond with those reported in the literature.<sup>[4]</sup>

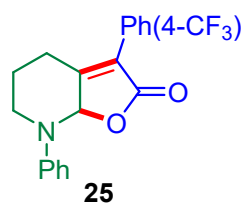

### 7-Phenyl-3-(4-(trifluoromethyl)phenyl)-5,6,7,7a-tetrahydrofuro[2,3-*b*]pyridin-2(4*H*)-one (25)

Compound **25** was prepared following the general procedure, purification by column chromatography on silica gel (petroleum ether/EtOAc = 10:1) yielded **25** (77.5 mg, 72%) as a reddish solid. M.p.: 145 – 146 °C. <sup>1</sup>H NMR (400 MHz, Chloroform-*d*)  $\delta$  = 7.74 – 7.72 (m, 2H), 7.68 – 7.66 (m, 2H), 7.37 – 7.33 (m, 2H), 7.20 – 7.18 (m, 2H), 7.04 (t,  $J$  = 7.2 Hz, 1H), 5.86 (s, 1H), 3.42 (t,  $J$  = 5.6 Hz, 2H), 3.25 – 3.02 (m, 1H), 2.76 – 2.51 (m, 1H), 2.25 – 2.03 (m, 1H), 2.02 – 1.78 (m, 1H). <sup>13</sup>C NMR (100 MHz, Chloroform-*d*)  $\delta$  = 170.4, 159.4, 147.9, 132.9, 130.9 (d,  $^2J_{C-F}$  = 32.5 Hz), 129.5, 129.4, 126.6, 125.6 (d,  $^4J_{C-F}$  = 3.7 Hz), 123.9 (d,  $^1J_{C-F}$  = 270.7 Hz), 122.3, 118.0, 90.3, 47.1, 24.4, 24.0. <sup>19</sup>F NMR (375 MHz, Chloroform-*d*)  $\delta$  = – 62.7. HR-MS (ESI)  $m/z$  calc. for C<sub>20</sub>H<sub>17</sub>F<sub>3</sub>NO<sub>2</sub> [M+H]<sup>+</sup>: 360.1206, found: 360.1202.

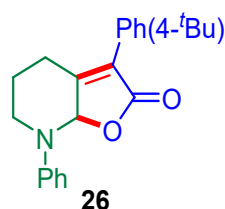

### 3-(4-(*tert*-Butyl)phenyl)-7-phenyl-5,6,7,7a-tetrahydrofuro[2,3-*b*]pyridin-2(4*H*)-one (26)

Compound **26** was prepared following the general procedure, purification by column chromatography on silica gel (petroleum ether/EtOAc = 10:1) yielded **26** (67.7 mg, 65%) as a yellowish solid. M.p.: 156 – 157 °C. <sup>1</sup>H NMR (400 MHz, Chloroform-*d*)  $\delta$  = 7.52 – 7.48 (m, 4H), 7.36 – 7.32 (m, 2H), 7.19 – 7.17 (m, 2H), 7.02 (t,  $J$  = 7.2 Hz, 1H), 5.84 (s, 1H), 3.48 – 3.35 (m, 2H), 3.28 – 3.08 (m, 1H), 2.73 – 2.47 (m, 1H), 2.18 – 2.00 (m, 1H), 1.99 – 1.81 (m, 1H), 1.36 (s, 9H). <sup>13</sup>C NMR (100 MHz, Chloroform-*d*)  $\delta$  = 171.2, 156.7, 152.1, 148.1, 129.3, 128.8, 127.6, 126.4, 125.6, 121.8, 117.6, 90.2, 46.7,

34.8, 31.3, 24.3, 23.7. HR-MS (ESI)  $m/z$  calc. for  $C_{23}H_{26}NO_2$   $[M+H]^+$ : 348.1958, found: 348.1963.

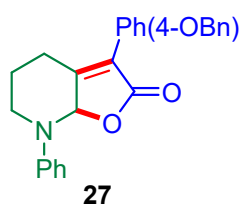

**3-(4-(Benzyloxy)phenyl)-7-phenyl-5,6,7,7a-tetrahydrofuro[2,3-*b*]pyridin-2(4*H*)-one (27)**

Compound **27** was prepared following the general procedure with constant current at 5.0 mA, purification by column chromatography on silica gel (petroleum ether/EtOAc = 10:1) yielded **27** (88.2 mg, 74%) as a yellowish solid. M.p.: 153 – 154 °C.  $^1H$  NMR (400 MHz, Chloroform-*d*)  $\delta$  = 7.53 – 7.50 (m, 2H), 7.46 – 7.39 (m, 4H), 7.36 – 7.32 (m, 3H), 7.19 – 7.17 (m, 2H), 7.08 – 7.00 (m, 3H), 5.83 (s, 1H), 5.12 (s, 2H), 3.49 – 3.32 (m, 2H), 3.27 – 2.98 (m, 1H), 2.71 – 2.44 (m, 1H), 2.17 – 1.98 (m, 1H), 1.97 – 1.79 (m, 1H).  $^{13}C$  NMR (100 MHz, Chloroform-*d*)  $\delta$  = 171.3, 159.3, 155.7, 148.1, 136.7, 130.5, 129.3, 128.7, 128.1, 127.5, 127.2, 122.0, 121.8, 117.6, 115.0, 90.2, 70.1, 46.6, 24.2, 23.7. HR-MS (ESI)  $m/z$  calc. for  $C_{26}H_{24}NO_3$   $[M+H]^+$ : 398.1751, found: 398.1743.

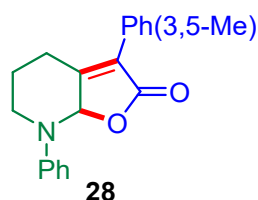

**3-(3,5-Dimethylphenyl)-7-phenyl-5,6,7,7a-tetrahydrofuro[2,3-*b*]pyridin-2(4*H*)-one (28)**

Compound **28** was prepared following the general procedure, purification by column chromatography on silica gel (petroleum ether/EtOAc = 20:1) yielded **28** (56.5 mg, 59%) as a white solid. M.p.: 158 – 159 °C.  $^1H$  NMR (400 MHz, Chloroform-*d*)  $\delta$  = 7.36 – 7.32 (m, 2H), 7.19 – 7.17 (m, 2H), 7.15 (s, 2H), 7.06 (s, 1H), 7.02 (t,  $J$  = 7.2 Hz, 1H), 5.82 (s, 1H), 3.49 – 3.32 (m, 2H), 3.25 – 3.04 (m, 1H), 2.68 – 2.49 (m, 1H), 2.37 (s, 6H), 2.17 – 1.99 (m, 1H), 1.99 – 1.78 (m, 1H).  $^{13}C$  NMR (100 MHz, Chloroform-*d*)  $\delta$  = 171.1, 157.1, 148.1, 138.2, 130.7, 129.3, 129.1, 127.9, 126.8, 121.9, 117.6, 90.2, 46.7,

24.3, 23.8, 21.4. HR-MS (ESI)  $m/z$  calc. for  $C_{21}H_{22}NO_2$   $[M+H]^+$ : 320.1645, found: 320.1646.

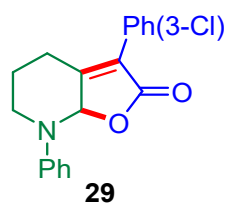

**3-(3-Chlorophenyl)-7-phenyl-5,6,7,7a-tetrahydrofuro[2,3-*b*]pyridin-2(4*H*)-one  
(29)**

Compound **29** was prepared following the general procedure, purification by column chromatography on silica gel (petroleum ether/EtOAc = 20:1) yielded **29** (74.1 mg, 76%) as a reddish solid. M.p.: 149 – 150 °C.  $^1H$  NMR (400 MHz, Chloroform-*d*)  $\delta$  = 7.53 (s, 1H), 7.46 – 7.42 (m, 1H), 7.40 – 7.39 (m, 2H), 7.36 – 7.32 (m, 2H), 7.19 – 7.17 (m, 2H), 7.03 (t,  $J$  = 7.2 Hz, 1H), 5.83 (s, 1H), 3.41 (t,  $J$  = 6.0 Hz, 2H), 3.26 – 3.03 (m, 1H), 2.72 – 2.48 (m, 1H), 2.22 – 2.02 (m, 1H), 1.98 – 1.78 (m, 1H).  $^{13}C$  NMR (100 MHz, Chloroform-*d*)  $\delta$  = 170.5, 158.7, 148.0, 134.6, 131.0, 129.9, 129.4, 129.1, 129.05, 127.3, 126.5, 122.2, 117.9, 90.3, 46.9, 24.3, 23.9. HR-MS (ESI)  $m/z$  calc. for  $C_{19}H_{17}^{35}ClNO_2$   $[M+H]^+$ : 326.0942, found: 326.0939. The analytical data correspond with those reported in the literature.<sup>[4]</sup>

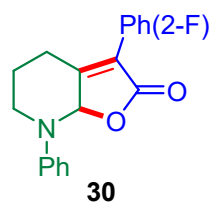

**3-(2-Fluorophenyl)-7-phenyl-5,6,7,7a-tetrahydrofuro[2,3-*b*]pyridin-2(4*H*)-one  
(30)**

Compound **30** was prepared following the general procedure, purification by column chromatography on silica gel (petroleum ether/EtOAc = 20:1) yielded **30** (34.3 mg, 70%) as a white crystalline. M.p.: 150 – 151 °C.  $^1H$  NMR (400 MHz, Chloroform-*d*)  $\delta$  = 7.59 (t,  $J$  = 7.6 Hz, 1H), 7.48 – 7.43 (m, 1H), 7.40 – 7.36 (m, 2H), 7.30 (t,  $J$  = 7.6 Hz, 1H), 7.24 – 7.19 (m, 3H), 7.07 (t,  $J$  = 7.6 Hz, 1H), 5.89 (s, 1H), 3.46 (t,  $J$  = 6.0 Hz, 2H), 3.04 – 2.79 (m, 1H), 2.68 – 2.43 (m, 1H), 2.25 – 2.06 (m, 1H), 2.04 – 1.84 (m, 1H).  $^{13}C$

NMR (100 MHz, Chloroform-*d*)  $\delta$  = 170.6, 161.0 (d,  $^1J_{\text{C-F}}$  = 247.8 Hz), 148.1, 131.4 (d,  $^4J_{\text{C-F}}$  = 2.8 Hz), 130.9 (d,  $^3J_{\text{C-F}}$  = 8.1 Hz), 129.3, 124.4 (d,  $^4J_{\text{C-F}}$  = 3.5 Hz), 122.13, 122.10, 117.9, 117.1 (d,  $^2J_{\text{C-F}}$  = 14.8 Hz), 115.9 (d,  $^2J_{\text{C-F}}$  = 22.0 Hz), 90.5. 47.2, 24.5 (d,  $^4J_{\text{C-F}}$  = 4.9 Hz), 24.2.  $^{19}\text{F}$  NMR (375 MHz, Chloroform-*d*)  $\delta$  = - 113.3. HR-MS (ESI)  $m/z$  calc. for  $\text{C}_{19}\text{H}_{17}\text{FNO}_2$   $[\text{M}+\text{H}]^+$ : 310.1238, found: 310.1233.

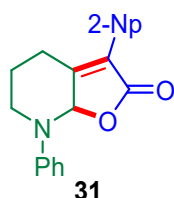

**3-(Naphthalen-2-yl)-7-phenyl-5,6,7,7a-tetrahydrofuro[2,3-*b*]pyridin-2(4*H*)-one (31)**

Compound **31** was prepared following the general procedure, purification by column chromatography on silica gel (petroleum ether/EtOAc = 20:1) yielded **31** (64.5 mg, 63%) as a white solid. M.p.: 180 – 181 °C.  $^1\text{H}$  NMR (400 MHz, Chloroform-*d*)  $\delta$  = 8.07 (d,  $J$  = 1.6 Hz, 1H), 7.94 – 7.86 (m, 3H), 7.63 (dd,  $J$  = 8.4, 1.6 Hz, 1H), 7.56 – 7.51 (m, 2H), 7.38 – 7.34 (m, 2H), 7.21 – 7.19 (m, 2H), 7.03 (t,  $J$  = 7.2 Hz, 1H), 5.89 (s, 1H), 3.44 (t,  $J$  = 6.0 Hz, 2H), 3.32 – 3.14 (m, 1H), 2.78 – 2.56 (m, 1H), 2.21 – 2.02 (m, 1H), 2.01 – 1.81 (m, 1H).  $^{13}\text{C}$  NMR (100 MHz, Chloroform-*d*)  $\delta$  = 171.0, 157.6, 148.1, 133.2, 133.1, 129.3, 128.9, 128.4, 128.3, 127.8, 127.7, 126.9, 126.7, 126.5, 126.2, 122.0, 117.8, 90.3, 46.8, 24.3, 23.9. HR-MS (ESI)  $m/z$  calc. for  $\text{C}_{23}\text{H}_{20}\text{NO}_2$   $[\text{M}+\text{H}]^+$ : 342.1489, found: 342.1492.

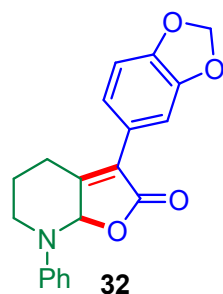

**3-(Benzo[*d*][1,3]dioxol-5-yl)-7-phenyl-5,6,7,7a-tetrahydrofuro[2,3-*b*]pyridin-2(4*H*)-one (32)**

Compound **32** was prepared following the general procedure, purification by column



chromatography on silica gel (petroleum ether/EtOAc = 20:1) yielded **32** (51.2 mg, 51%) as a white solid, M.p.: 176 – 177 °C. <sup>1</sup>H NMR (400 MHz, Chloroform-*d*) δ = 7.35 – 7.32 (m, 2H), 7.18 – 7.16 (m, 2H), 7.06 – 7.00 (m, 3H), 6.90 (d, *J* = 8.0 Hz, 1H), 6.01 (s, 2H), 5.81 (s, 1H), 3.48 – 3.34 (m, 2H), 3.27 – 3.03 (m, 1H), 2.73 – 2.47 (m, 1H), 2.19 – 2.01 (m, 1H), 1.98 – 1.84 (m, 1H). <sup>13</sup>C NMR (100 MHz, Chloroform-*d*) δ = 171.0, 156.1, 148.2, 148.1, 147.9, 129.3, 127.3, 123.3, 123.0, 121.9, 117.7, 109.4, 108.6, 101.4, 90.2, 46.7, 24.2, 23.8. HR-MS (ESI) *m/z* calc. for C<sub>20</sub>H<sub>18</sub>NO<sub>4</sub> [M+H]<sup>+</sup>: 336.1230, found: 336.1233.

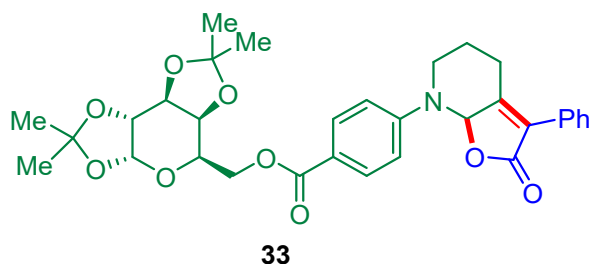

**((3a*R*,5*R*,5a*S*,8a*S*,8b*R*)-2,2,7,7-Tetramethyltetrahydro-5*H*-bis([1,3]dioxolo)[4,5-*b*:4',5'-*d*]pyran-5-yl)methyl 4-((*R*)-2-oxo-3-phenyl-2,5,6,7a-tetrahydrofuro[2,3-*b*]pyridin-7(4*H*)-yl)benzoate (33)**

Compound **33** was prepared following the general procedure with constant current at 7.0 mA, purification by column chromatography on silica gel (petroleum ether/EtOAc = 6:1) yielded **33** (100.3 mg, 58%, *d.r.* = 1:1) as a yellow syrup. <sup>1</sup>H NMR (400 MHz, Chloroform-*d*) δ = 8.02 – 8.00 (m, 2H), 7.57 – 7.55 (m, 2H), 7.49 – 7.39 (m, 2H), 7.43 (t, *J* = 4.0 Hz, 1H), 7.12 – 7.10 (m, 2H), 6.02 (s, 1H), 5.57 (d, *J* = 4.8 Hz, 1H), 4.65 (dd, *J* = 8.0, 2.8 Hz, 1H), 4.51 (dd, *J* = 11.6, 4.8 Hz, 1H), 4.43 – 4.38 (m, 1H), 4.356 – 4.33 (m, 2H), 4.20 – 4.17 (m, 1H), 3.68 – 3.63 (m, 1H), 3.36 – 3.29 (m, 1H), 3.22 – 3.14 (m, 1H), 2.69 – 2.61 (m, 1H), 2.16 – 2.07 (m, 1H), 1.94 – 1.85 (m, 1H), 1.53 (s, 3H), 1.48 (s, 3H), 1.36 (s, 3H), 1.34 (s, 3H). HR-MS (ESI) *m/z* calc. for C<sub>32</sub>H<sub>36</sub>NO<sub>9</sub> [M+H]<sup>+</sup>: 578.2385, found: 578.2393.

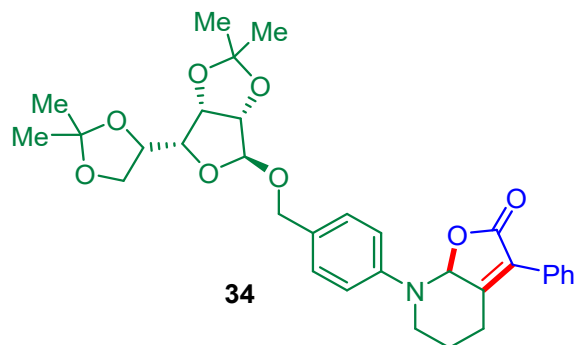

**7-(4-(((3*aS*,4*S*,6*R*,6*aS*)-6-((*R*)-2,2-Dimethyl-1,3-dioxolan-4-yl)-2,2-dimethyltetrahydrofuro[3,4-*d*][1,3]dioxol-4-yl)oxy)methyl)phenyl)-3-phenyl-5,6,7,7*a*-tetrahydrofuro[2,3-*b*]pyridin-2(4*H*)-one (34)**

Compound **34** was prepared following the general procedure, purification by column chromatography on silica gel (petroleum ether/EtOAc = 5:1) yielded **34** (89.6 mg, 53%) as a yellow syrup. <sup>1</sup>H NMR (400 MHz, Chloroform-*d*)  $\delta$  = 7.55 – 7.54 (m, 2H), 7.48 – 7.39 (m, 3H), 7.30 – 7.28 (m, 2H), 7.16 – 7.14 (m, 2H), 5.82 (s, 1H), 5.07 (s, 1H), 4.79 (dd, *J* = 6.0, 3.6 Hz, 1H), 4.65 – 4.59 (m, 2H), 4.46 – 4.39 (m, 2H), 4.14 – 4.10 (m, 1H), 4.03 – 3.96 (m, 2H), 3.45 – 3.34 (m, 2H), 3.23 – 3.08 (m, 1H), 2.68 – 2.51 (m, 1H), 2.16 – 2.04 (m, 1H), 1.94 – 1.82 (m, 1H), 1.47 (s, 6H), 1.39 (s, 3H), 1.32 (s, 3H). <sup>13</sup>C NMR (100 MHz, Chloroform-*d*)  $\delta$  = 170.9, 157.2, 147.9, 130.6, 129.5, 129.2, 129.1, 129.0, 128.6, 127.8, 117.6, 112.6, 109.3, 105.4, 90.1, 85.1, 80.4, 79.6, 73.2, 68.7, 67.0, 46.7, 27.0, 25.9, 25.3, 24.5, 24.2, 23.7. HR-MS (ESI) *m/z* calc. for C<sub>32</sub>H<sub>38</sub>NO<sub>8</sub> [M+H]<sup>+</sup>: 564.2592, found: 564.2593.

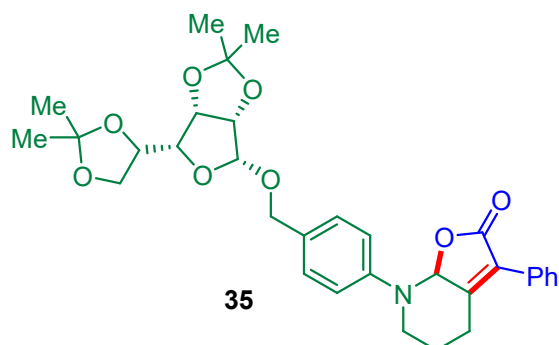

**7-(4-(((3*aS*,4*R*,6*R*,6*aS*)-6-((*R*)-2,2-Dimethyl-1,3-dioxolan-4-yl)-2,2-dimethyltetrahydrofuro[3,4-*d*][1,3]dioxol-4-yl)oxy)methyl)phenyl)-3-phenyl-5,6,7,7*a*-tetrahydrofuro[2,3-*b*]pyridin-2(4*H*)-one (35)**

Compound **35** was prepared following the general procedure with constant current at

7.0 mA, purification by column chromatography on silica gel (petroleum ether/EtOAc = 5:1) yielded **35** (103.1 mg, 61%) as a yellow syrup. <sup>1</sup>H NMR (400 MHz, Chloroform-*d*) δ = 7.56 – 7.54 (m, 2H), 7.49 – 7.40 (m, 3H), 7.36 – 7.34 (m, 2H), 7.16 – 7.14 (m, 2H), 5.83 (s, 1H), 4.88 (d, *J* = 12.0 Hz, 1H), 4.73 (d, *J* = 3.6 Hz, 1H), 4.70 (dd, *J* = 6.0, 4.0 Hz, 1H), 4.63 (d, *J* = 12.0 Hz, 1H), 4.57 (dd, *J* = 6.4, 3.6 Hz, 1H), 4.50 – 4.45 (m, 1H), 4.11 (d, *J* = 5.2 Hz, 2H), 3.57 (q, *J* = 4.0 Hz, 1H), 3.41 (t, *J* = 6.0 Hz, 2H), 3.25 – 3.10 (m, 1H), 2.67 – 2.52 (m, 1H), 2.16 – 2.04 (m, 1H), 1.95 – 1.82 (m, 1H), 1.57 (s, 3H), 1.45 (s, 3H), 1.37 (d, *J* = 10.4 Hz, 6H). <sup>13</sup>C NMR (100 MHz, Chloroform-*d*) δ = 171.0, 157.3, 147.9, 130.5, 129.5, 129.2, 129.1, 129.0, 128.7, 127.7, 117.7, 113.7, 109.3, 100.9, 89.9, 79.8, 79.1, 73.3, 71.1, 66.9, 47.0, 27.0, 25.8, 25.3, 25.0, 24.3, 23.8. HR-MS (ESI) *m/z* calc. for C<sub>32</sub>H<sub>38</sub>NO<sub>8</sub> [M+H]<sup>+</sup>: 564.2592, found: 564.2588.

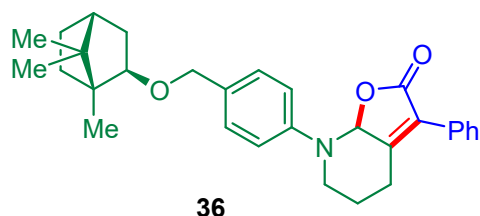

**3-Phenyl-7-(4-(((1*R*,2*R*,4*R*)-1,7,7-trimethylbicyclo[2.2.1]heptan-2-yl)oxy)methyl)phenyl)-5,6,7,7a-tetrahydrofuro[2,3-*b*]pyridin-2(4*H*)-one (36)**

Compound **36** was prepared following the general procedure, purification by column chromatography on silica gel (petroleum ether/EtOAc = 10:1) yielded **36** (97.4 mg, 71%) as a white solid. M.p.: 133 – 134 °C. <sup>1</sup>H NMR (400 MHz, Chloroform-*d*) δ = 7.56 – 7.54 (m, 2H), 7.48 – 7.39 (m, 3H), 7.30 – 7.28 (m, 2H), 7.16 – 7.14 (m, 2H), 5.80 (s, 1H), 4.50 (d, *J* = 12.0 Hz, 1H), 4.35 (d, *J* = 12.0 Hz, 1H), 3.40 (t, *J* = 5.6 Hz, 2H), 3.31 (q, *J* = 3.6 Hz, 1H), 3.24 – 3.09 (m, 1H), 2.68 – 2.48 (m, 1H), 2.17 – 2.03 (m, 1H), 1.93 – 1.80 (m, 2H), 1.71 – 1.64 (m, 2H), 1.63 – 1.57 (m, 1H), 1.52 – 1.47 (m, 1H), 1.04 (s, 3H), 0.99 (d, *J* = 8.8 Hz, 2H), 0.95 (s, 3H), 0.82 (s, 3H). <sup>13</sup>C NMR (100 MHz, Chloroform-*d*) δ = 171.0, 157.5, 147.2, 133.4, 129.3, 129.1, 128.9, 128.6, 128.3, 127.6, 117.8, 90.2, 86.4, 70.2, 49.3, 47.3, 46.6, 45.1, 38.5, 34.5, 27.3, 24.4, 23.9, 20.4, 20.3, 12.0. HR-MS (ESI) *m/z* calc. for C<sub>30</sub>H<sub>36</sub>NO<sub>3</sub> [M+H]<sup>+</sup>: 458.2690, found: 458.2692.

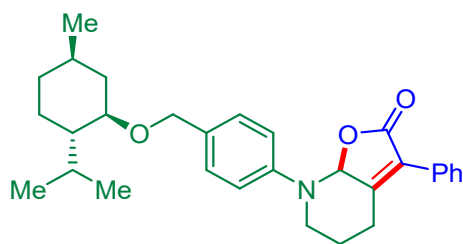

**37**

**7-(4-(((1*R*,2*S*,5*R*)-2-Isopropyl-5-methylcyclohexyl)oxy)methyl)phenyl)-3-phenyl-5,6,7,7a-tetrahydrofuro[2,3-*b*]pyridin-2(4*H*)-one (37)**

Compound **37** was prepared following the general procedure, purification by column chromatography on silica gel (petroleum ether/EtOAc = 10:1) yielded **37** (103.4 mg, 75%) as a white solid. M.p.: 175 – 176 °C. <sup>1</sup>H NMR (800 MHz, Chloroform-*d*) δ = 7.55 – 7.54 (m, 2H), 7.47 – 7.46 (m, 2H), 7.41 (t, *J* = 3.6 Hz, 1H), 7.32 – 7.31 (m, 2H), 7.16 – 7.15 (m, 2H), 5.80 (s, 1H), 4.61 (d, *J* = 5.6 Hz, 1H), 4.36 (d, *J* = 5.6 Hz, 1H), 3.39 (t, *J* = 2.8 Hz, 2H), 3.19 – 3.15 (m, 2H), 2.62 – 2.53 (m, 1H), 2.31 – 2.28 (m, 1H), 2.19 (d, *J* = 6.0 Hz, 1H), 2.13 – 2.06 (m, 1H), 1.92 – 1.83 (m, 1H), 1.67 – 1.62 (m, 2H), 1.40 – 1.34 (m, 1H), 1.30 – 1.27 (m, 1H), 1.00 – 0.84 (m, 9H), 0.72 (d, *J* = 3.6 Hz, 3H). <sup>13</sup>C NMR (200 MHz, Chloroform-*d*) δ = 171.0, 157.4, 147.6, 132.8, 129.3, 129.1, 129.0, 128.6, 127.6, 117.8, 90.3, 78.6, 70.0, 48.3, 47.2, 40.4, 34.6, 31.6, 25.5, 24.3, 23.9, 23.3, 22.4, 21.1, 16.1. HR-MS (ESI) *m/z* calc. for C<sub>30</sub>H<sub>38</sub>NO<sub>3</sub> [M+H]<sup>+</sup>: 460.2846, found: 460.2844.

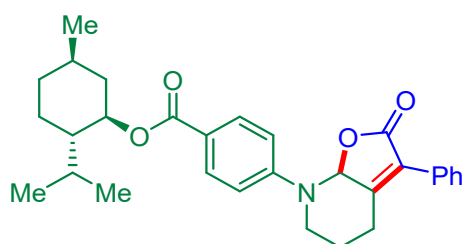

**38**

**(1*R*,2*S*,5*R*)-2-Isopropyl-5-methylcyclohexyl 4-(2-oxo-3-phenyl-2,5,6,7a-tetrahydrofuro[2,3-*b*]pyridin-7(4*H*)-yl)benzoate (38)**

Compound **38** was prepared following the general procedure, purification by column chromatography on silica gel (petroleum ether/EtOAc = 8:1) yielded **38** (96.6 mg, 68%, *d.r.* = 1:1) as a yellowish solid. M.p.: 151 – 152 °C. <sup>1</sup>H NMR (400 MHz, Chloroform-*d*) δ = 8.02 – 8.00 (m, 2H), 7.57 – 7.55 (m, 2H), 7.49 – 7.41 (m, 3H), 7.14 – 7.11 (m, 2H),

6.02 (s, 0.5H), 6.01 (s, 0.5H), 4.94 – 4.88 (m, 1H), 3.67 – 3.61 (m, 1H), 3.37 – 3.29 (m, 1H), 3.22 – 3.14 (m, 1H), 2.69 – 2.62 (m, 1H), 2.19 – 2.08 (m, 2H), 2.00 – 1.87 (m, 2H), 1.73 (d,  $J = 11.2$  Hz, 2H), 1.61 – 1.51 (m, 2H), 1.19 – 1.05 (m, 2H), 0.97 – 0.89 (m, 7H), 0.80 (d,  $J = 6.8$  Hz, 3H).  $^{13}\text{C}$  NMR (100 MHz, Chloroform- $d$ )  $\delta = 170.7, 166.2, 156.3, 151.2, 131.5, 129.2, 129.1, 129.0, 128.8, 128.7, 122.0, 114.7, 109.7, 108.8, 96.4, 89.18, 89.15, 71.2, 70.8, 70.6, 66.29, 66.25, 63.63, 63.57, 44.0, 26.1, 26.0, 25.0, 24.5, 23.5, 22.7$ . HR-MS (ESI)  $m/z$  calc. for  $\text{C}_{30}\text{H}_{36}\text{NO}_4$   $[\text{M}+\text{H}]^+$ : 474.6205, found: 474.6199.

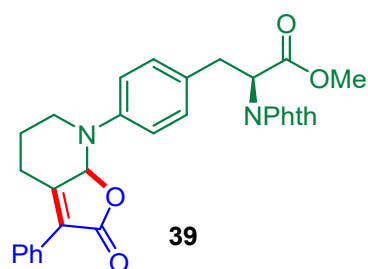

**Methyl**                    **(2S)-2-(1,3-dioxisoindolin-2-yl)-3-(4-(2-oxo-3-phenyl-2,5,6,7a-tetrahydrofuro[2,3-*b*]pyridin-7(4H)-yl)phenyl)propanoate (39)**

Compound **39** was prepared following the general procedure with constant current at 5.0 mA for 24 h, purification by column chromatography on silica gel (petroleum ether/EtOAc = 5:1) yielded **39** (103.4 mg, 66%) as a yellow syrup.  $^1\text{H}$  NMR (400 MHz, Chloroform- $d$ )  $\delta = 7.81 - 7.79$  (m, 2H), 7.71 – 7.69 (m, 2H), 7.52 – 7.50 (m, 2H), 7.46 – 7.37 (m, 3H), 7.13 – 7.11 (m, 2H), 7.00 – 6.98 (m, 2H), 5.73 (s, 1H), 5.14 (dd,  $J = 9.6, 6.4$  Hz, 1H), 3.78 (s, 3H), 3.57 – 3.49 (m, 2H), 3.35 – 3.26 (m, 2H), 3.19 – 3.02 (m, 1H), 2.63 – 2.43 (m, 1H), 2.12 – 1.96 (m, 1H), 1.90 – 1.73 (m, 1H).  $^{13}\text{C}$  NMR (100 MHz, Chloroform- $d$ )  $\delta = 170.9, 169.5, 167.6, 157.3, 146.8, 134.2, 131.6, 129.7, 129.2, 129.1, 129.0, 128.6, 127.7, 123.6, 90.1, 53.3, 52.9, 33.8, 24.2, 23.7$ . HR-MS (ESI)  $m/z$  calc. for  $\text{C}_{31}\text{H}_{27}\text{N}_2\text{O}_6$   $[\text{M}+\text{H}]^+$ : 523.1864, found: 523.1858.

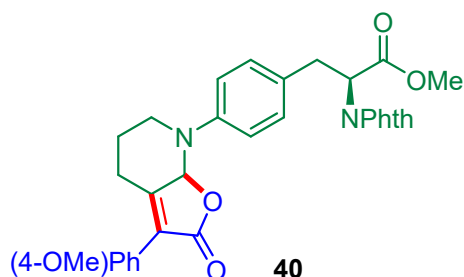

**Methyl**                    **(2S)-2-(1,3-dioxisoindolin-2-yl)-3-(4-(3-(4-methoxyphenyl)-2-oxo-**

**2,5,6,7a-tetrahydrofuro[2,3-*b*]pyridin-7(4*H*)-yl)phenyl)propanoate (40)**

Compound **40** was prepared following the general procedure with constant current at 7.0 mA for 24 h, purification by column chromatography on silica gel (petroleum ether/EtOAc = 4:1) yielded **40** (117.7 mg, 71%) as a yellow syrup. <sup>1</sup>H NMR (400 MHz, Chloroform-*d*) δ = 7.81 – 7.79 (m, 2H), 7.71 – 7.69 (m, 2H), 7.48 – 7.46 (m, 2H), 7.13 – 7.10 (m, 2H), 6.99 – 6.95 (m, 4H), 5.71 (s, 1H), 5.14 (dd, *J* = 10.0, 6.8 Hz, 1H), 3.83 (s, 3H), 3.78 (s, 3H), 3.57 – 3.48 (m, 2H), 3.36 – 3.23 (m, 1H), 3.17 – 2.99 (m, 1H), 2.65 – 2.42 (m, 1H), 2.12 – 1.93 (m, 1H), 1.91 – 1.74 (m, 1H). <sup>13</sup>C NMR (100 MHz, Chloroform-*d*) δ = 171.2, 169.5, 167.6, 160.1, 155.5, 146.8, 134.2, 131.6, 130.4, 129.7, 127.2, 123.6, 121.6, 117.5, 114.1, 90.0, 55.4, 53.3, 52.9, 33.8, 29.7, 24.1, 23.7. HR-MS (ESI) *m/z* calc. for C<sub>32</sub>H<sub>29</sub>N<sub>2</sub>O<sub>7</sub> [M+H]<sup>+</sup>: 553.1969, found: 553.1973.

### Gram-Scale Synthesis of **3**

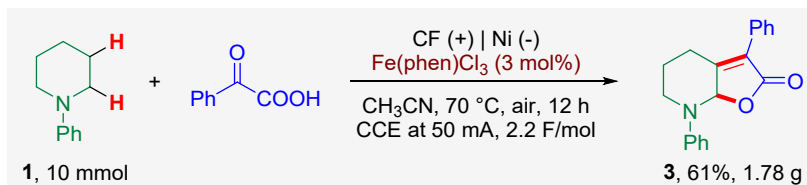

To an undivided reaction flask (diameter: 40 mm; length: 130 mm; volume: 200 mL) equipped with a teflon-coated magnetic stirring bar and teflon cap, a carbon felt anode (25 mm × 50 mm × 3 mm) and a platinum cathode (25 mm × 50 mm × 0.2 mm) were added **1** (1.62 mL, 10 mmol), **2** (1.80 g, 12 mmol, 1.2 equiv.), Fe(phen)Cl<sub>3</sub> (102.7 mg, 0.3 mmol, 3 mol%), followed by addition of CH<sub>3</sub>CN (100 mL). Electrocatalysis was performed at 70 °C with a constant current of 50 mA and maintained for 12 h. The carbon felt anode was washed with DCM (3 × 30 mL) in an ultrasonic bath. Evaporation of the solvent and subsequent column chromatography (petroleum ether/EtOAc = 20:1) yielded **3** (1.78 g, 61%) as a reddish solid.

## Control Experiments

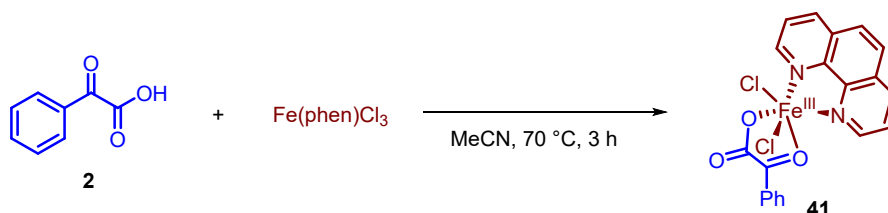

(i) The Fe complex **41** was synthesized according to literature report with slight modification.<sup>5</sup> To a 10 mL pre-dried reaction flask was added 2-oxo-2-phenylacetic acid **2** (150.1 mg, 1.0 mmol), Fe(phen)Cl<sub>3</sub> (342.4 mg, 1.0 mmol) and CH<sub>3</sub>CN (2.0 mL), then the reaction was vigorously stirred at 70 °C for 3 h. The evaporation and recrystallization using dichloromethane and hexane gave the Fe complex **41** as a deep red solid (446.8 mg, 98%).

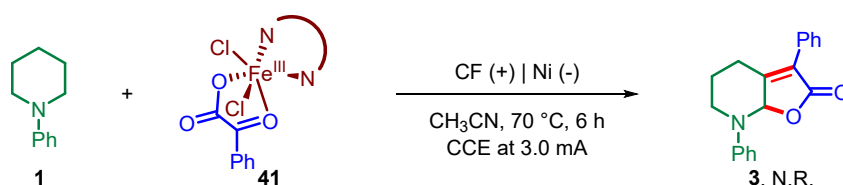

(ii) The electrocatalysis was carried out in an undivided cell with a carbon felt anode (10 mm × 20 mm × 3 mm) and a nickel plate cathode (10 mm × 15 mm × 0.2 mm). To a 15 mL pre-dried undivided electrochemical cell (15 mL) equipped with a magnetic bar was added *N*-aryl piperidine **1** (32.2 mg, 0.20 mmol, 1.0 equiv.), Fe complex **41** (0.24 mmol, 1.2 equiv.) and CH<sub>3</sub>CN (5.0 mL). The electrocatalysis was performed at 70 °C with a constant current of 3.0 mA maintained for 6 h. The carbon felt anode was washed with DCM (3 × 5 mL) in an ultrasonic bath. And no reaction was observed.

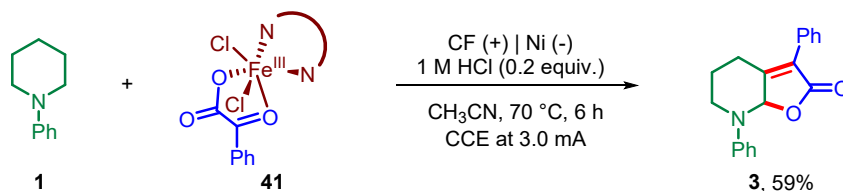

(iii) The electrocatalysis was carried out in an undivided cell with a carbon felt anode (10 mm × 20 mm × 3 mm) and a nickel cathode (10 mm × 15 mm × 0.2 mm). To a 15 mL pre-dried undivided electrochemical cell (15 mL) equipped with a magnetic bar was added *N*-aryl piperidine **1** (32.2 mg, 0.20 mmol, 1.0 equiv.), Fe complex **41** (0.24



mmol, 1.2 equiv.), 1.0 M HCl (0.04 mL, 0.04 mmol, 0.2 equiv.) and CH<sub>3</sub>CN (5.0 mL). The electrocatalysis was performed at 70 °C with a constant current of 3.0 mA maintained for 6 h. The carbon felt anode was washed with DCM (3 × 5 mL) in an ultrasonic bath. Evaporation of the solvent and subsequent column chromatography (petroleum ether/EtOAc = 20:1) yielded **3** (34.4 mg, 59%).

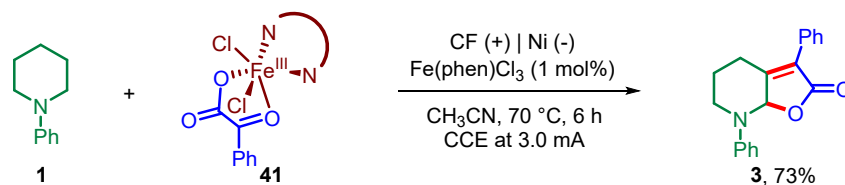

(iv) The electrocatalysis was carried out in an undivided cell with a carbon felt anode (10 mm × 20 mm × 3 mm) and a nickel cathode (10 mm × 15 mm × 0.2 mm). To a 15 mL pre-dried undivided electrochemical cell (15 mL) equipped with a magnetic bar was added *N*-aryl piperidine **1** (32.2 mg, 0.20 mmol, 1.0 equiv.), Fe complex **41** (0.24 mmol, 1.2 equiv.), Fe(phen)Cl<sub>3</sub> (0.7 mg, 1 mol%) and CH<sub>3</sub>CN (5.0 mL). The electrocatalysis was performed at 70 °C with a constant current of 3.0 mA maintained for 6 h. The carbon felt anode was washed with DCM (3 × 5 mL) in an ultrasonic bath. Evaporation of the solvent and subsequent column chromatography (petroleum ether/EtOAc = 20:1) yielded **3** (42.5 mg, 73%).

## X-ray Crystallography

Crystal structure of compound **19** (CCDC: 2218711)

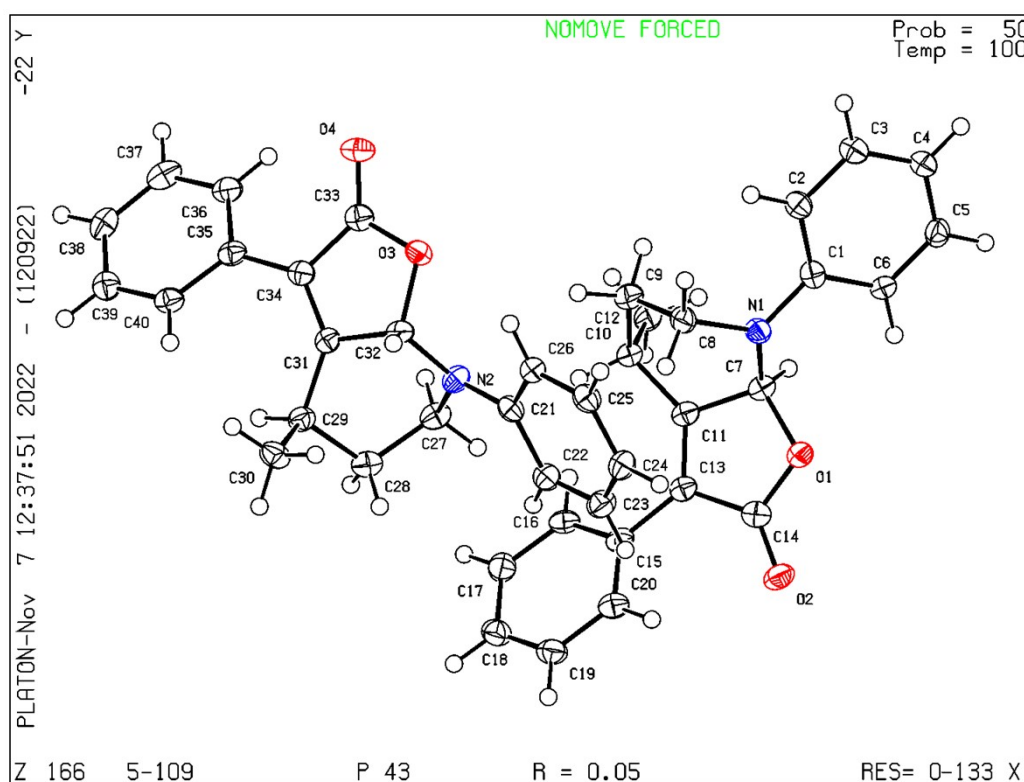

**Table S-1.** Crystal data and structure refinement for compound **19**.

|                      |                             |                       |
|----------------------|-----------------------------|-----------------------|
| Identification code  | <b>19</b>                   |                       |
| Empirical formula    | $C_{20}H_{19}NO_2$          |                       |
| Formula weight       | 305.36                      |                       |
| Temperature          | 100.01(16) K                |                       |
| Wavelength           | 1.54184 Å                   |                       |
| Crystal system       | Tetragonal                  |                       |
| Space group          | $P4_3$                      |                       |
| Unit cell dimensions | $a = 9.58017(5)$ Å          | $\alpha = 90^\circ$ . |
|                      | $b = 9.58017(5)$ Å          | $\beta = 90^\circ$ .  |
|                      | $c = 33.7964(3)$ Å          | $\gamma = 90^\circ$ . |
| Volume               | $3101.82(4)$ Å <sup>3</sup> |                       |
| Z                    | 8                           |                       |
| Density (calculated) | 1.308 Mg/m <sup>3</sup>     |                       |

|                                   |                                                   |
|-----------------------------------|---------------------------------------------------|
| Absorption coefficient            | 0.668 mm <sup>-1</sup>                            |
| F(000)                            | 1296                                              |
| Crystal size                      | 0.22 × 0.13 × 0.13 mm <sup>3</sup>                |
| Theta range for data collection   | 4.616 to 75.945°.                                 |
| Index ranges                      | -12 ≤ h ≤ 12, -10 ≤ k ≤ 10, -42 ≤ l ≤ 42          |
| Reflections collected             | 16868                                             |
| Independent reflections           | 6166 [R(int) = 0.0327]                            |
| Completeness to theta = 67.684°   | 99.9 %                                            |
| Absorption correction             | Semi-empirical from equivalents                   |
| Max. and min. transmission        | 1.00000 and 0.78178                               |
| Refinement method                 | Full-matrix least-squares on F <sup>2</sup>       |
| Data/restraints/parameters        | 6166/1/417                                        |
| Goodness-of-fit on F <sup>2</sup> | 1.142                                             |
| Final R indices [I > 2σ(I)]       | R <sub>1</sub> = 0.0518, wR <sub>2</sub> = 0.1242 |
| R indices (all data)              | R <sub>1</sub> = 0.0527, wR <sub>2</sub> = 0.1247 |
| Absolute structure parameter      | 0.28(9)                                           |
| Extinction coefficient            | n/a                                               |
| Largest diff. peak and hole       | 0.204 and -0.308 e.Å <sup>-3</sup>                |

## Cyclic Voltammetry

The cyclic voltammetry was carried out with a Shanghai Chenhua CHI760E workstation. A glassy-carbon (GC) electrode (5 mm-diameter, disk-electrode) was used as the working electrode, a Pt plate was used as the counter electrode and an Ag/Ag<sup>+</sup> electrode was used as the reference electrode in acetonitrile. The measurements were carried out at a scan rate of 100 mV s<sup>-1</sup>, if not indicated otherwise. The operation temperature was 298 K.

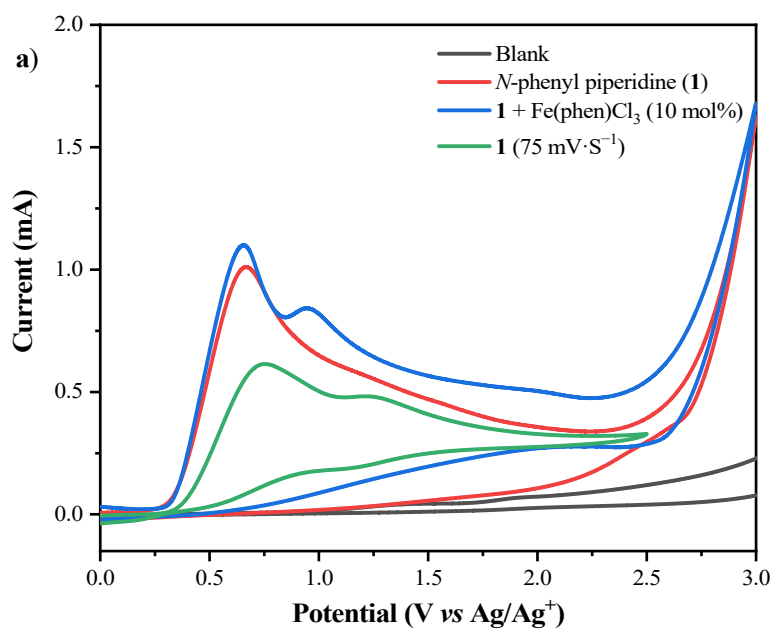

**Figure S-1.** Cyclic voltammograms of *N*-phenyl piperidine (**1**) and Fe(phen)Cl<sub>3</sub> at 100 mVs<sup>-1</sup> in MeCN. <sup>n</sup>Bu<sub>4</sub>NBF<sub>4</sub> (0.1 M in MeCN), blank (black), **1** (10 mM, red), **1** + Fe(phen)Cl<sub>3</sub> (1 mM, blue), **1** (10 mM, 75 mV·s<sup>-1</sup>).

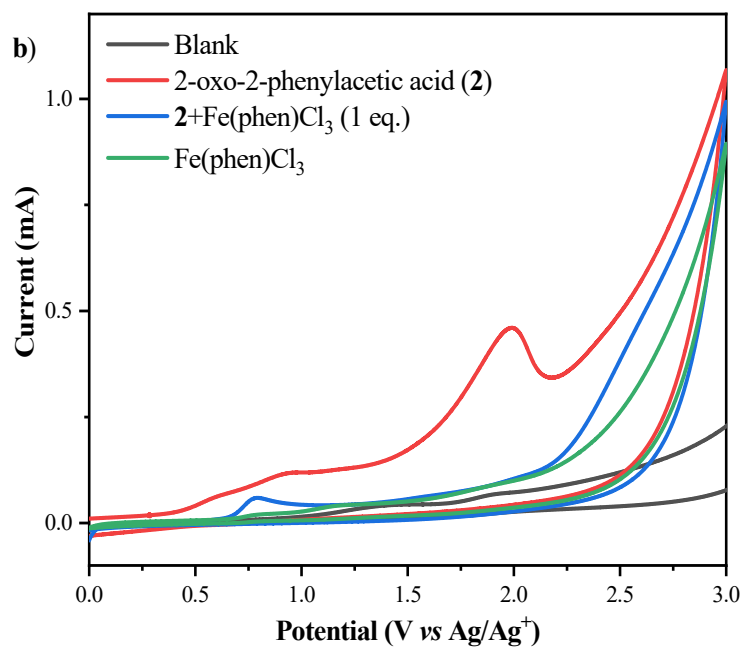

**Figure S-2.** Cyclic voltammograms of 2-oxo-2-phenylacetic acid (**2**) and Fe(phen)Cl<sub>3</sub> at 100 mVs<sup>-1</sup> in MeCN. <sup>n</sup>Bu<sub>4</sub>NBF<sub>4</sub> (0.1 M in MeCN), blank (black), **2** (10 mM, red), **2** + Fe(phen)Cl<sub>3</sub> (blue), Fe(phen)Cl<sub>3</sub> (10 mM, red).

## Bipolar Ultramicroelectrode Mass Spectrometry

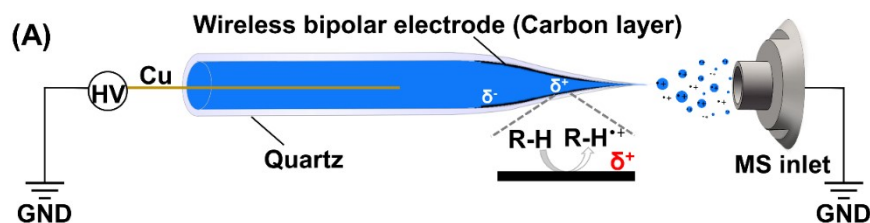

A bipolar ultramicroelectrode (BUME) combined with nano-electrospray ionization mass spectrometry was used to rapidly capture short-lived reactive intermediates. The fabrication of the bipolar ultramicroelectrode has been described in **Figure S-3**. A Cu wire (0.2 mm i.d.) is inserted into the quartz capillary from its rear end and then connected to a high-voltage power supply. The BUME can directly take advantages of a high electric field, which was applied to perform electrospray ionization and to induce synergetic redox reaction at the two ends of the carbon electrode. Thus, electrospray ionization and Faradaic reaction are activated simultaneously, permitting rapid transfer of the electrochemically generated short-lived intermediates into gas phase for subsequent MS analysis.

### Fabrication of bipolar ultramicroelectrode

A laser-based P-2000 pipette puller (Sutter Instrument Co., Novato, CA, USA) is used to fabricate a bare nanopipette from a quartz capillary (QF100-50-10, Sutter Instrument). The fabrication of a thin layer of carbon takes advantage of the pyrolysis of butane. Butane gas (~30 kPa) was sent into the nanopipette from its rear end and was heated by butane fire under a nitrogen atmosphere (~5 kPa through a quartz tube of O.D. 3.0 mm and I.D. 1.5 mm).

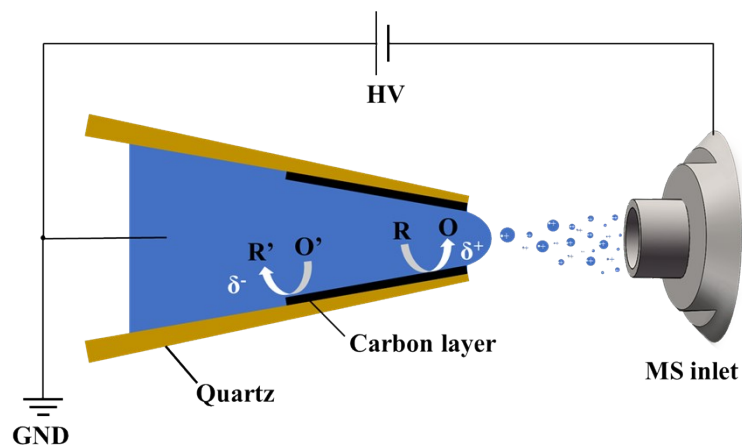

**Figure S-3.** Fabrication of BUME.

In this experiment, a positive high voltage of 896 V was applied to the Cu wire to induce redox reaction from a BUME nanopipette filled with 50  $\mu\text{M}$  *N*-phenyl piperidine in acetonitrile. The *N*-phenyl piperidine radical cation ( $m/z$  161.2) and the subsequently deprotonated iminium ( $m/z$  160.2) was immediately observed (**Figure S-4**).

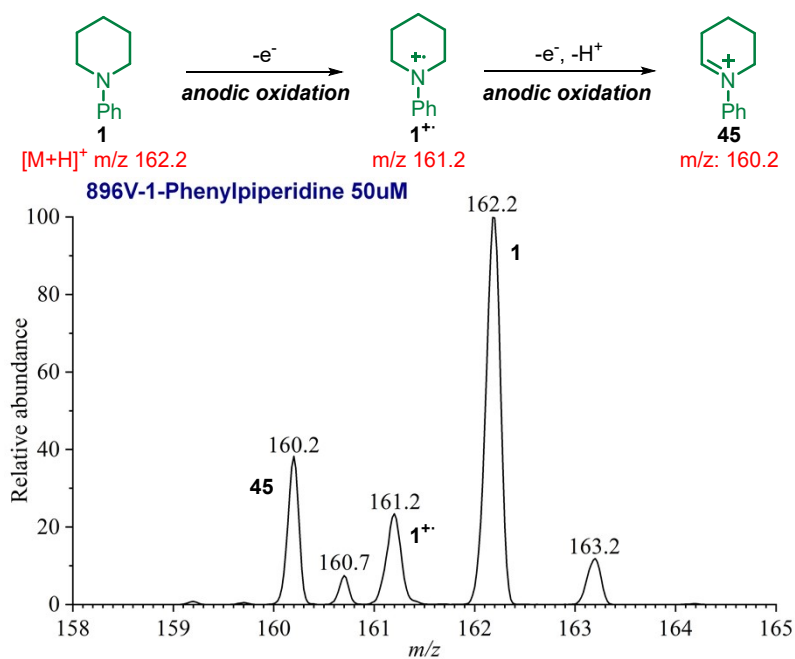

**Figure S-4.** Mass spectra for *N*-phenyl piperidine **1**.

## DFT Calculations

General information of DFT computational studies:

Implemented in Gaussian 16, Rev. A 03<sup>6</sup>, the unrestricted open-shell, dispersion-corrected (DFT-D3<sup>7</sup> with Becke-Johnson damping<sup>8</sup>, noted as D3(BJ) ) hybrid functional PBE0<sup>9</sup> and basis sets ma-TZVP<sup>10</sup> were utilized for single-point energy calculation, with the implicit solvation model SMD<sup>11</sup> using MeCN as the solvent and the keyword SCF = conver = 6 as an adjustment of SCF convergence criterion, while unrestricted open-shell functional PBE0<sup>9</sup>, with D3(BJ), and basis sets def2-SVP<sup>12</sup> were utilized in geometric optimization and frequencies analysis, with the implicit solvation model IEFPCM<sup>13</sup> using MeCN as the solvent and the default settings for all convergence criteria. They are noted as SMD(MeCN) / (U)PBE0-D3(BJ) / ma-TZVP // IEFPCM(MeCN) / (U)PBE0-D3(BJ) / def2-SVP. The UltraFine integration grid was used to enhance the accuracy of our calculations. With the results of frequencies analysis, thermal corrections to Gibbs energies (TCGs) were obtained with Shermo 2.2<sup>14</sup> software package under  $T = 343.15\text{K}$  and  $p = 1\text{atm}$ , by applying Grimme's interpolation for entropy<sup>15</sup> as a treatment for low frequencies, and setting harmonic vibrational frequency scale factors for zero-point energy (ZPE), thermal energy (U), and entropy (S) to 0.9816, 0.9525, and 0.9576, individually (obtained from our fitting procedure, see the part “Fitting Procedure of Harmonic Vibrational Frequency Scale Factor” for details). All intermediates do not have an imaginary frequency, and all transition states have been optimized by the Berny algorithm<sup>16</sup> and verified by IRC calculations with a sole imaginary frequency. All 3D-structure figures of molecules were generated using CYLview20 software<sup>17</sup>.

All molar Gibbs free energy changes ( $\Delta G^\theta$ ) were calculated via the formula (S.1):

$$\Delta G^\theta (\text{kcal/mol}) = \left[ \sum_B^{\text{Products}} [SPE(B) + TCG(B)] - \sum_B^{\text{Reactants}} [SPE(B) + TCG(B)] \right] \cdot 627.51 \quad (\text{S.1})$$

All molar Gibbs activation energies ( $\Delta G^\ddagger$ ) were calculated via the formula (S.2):

$$\Delta G^\ddagger (\text{kcal/mol}) = \left[ [SPE(B) + TCG(B)]_{TS} - \sum_B^{\text{Reactants}} [SPE(B) + TCG(B)] \right] \cdot 627.51 \quad (\text{S.2})$$



Where SPE = Single-Point Energy (Hartree), TCG = Thermal Corrections to Gibbs Free Energy (with translational, rotational and vibrational energies considered), TS = Transition State, 1 Hartree = 627.51 kcal/mol = 2625.5 kJ/mol. All SPEs and TCGs were obtained by calculation.

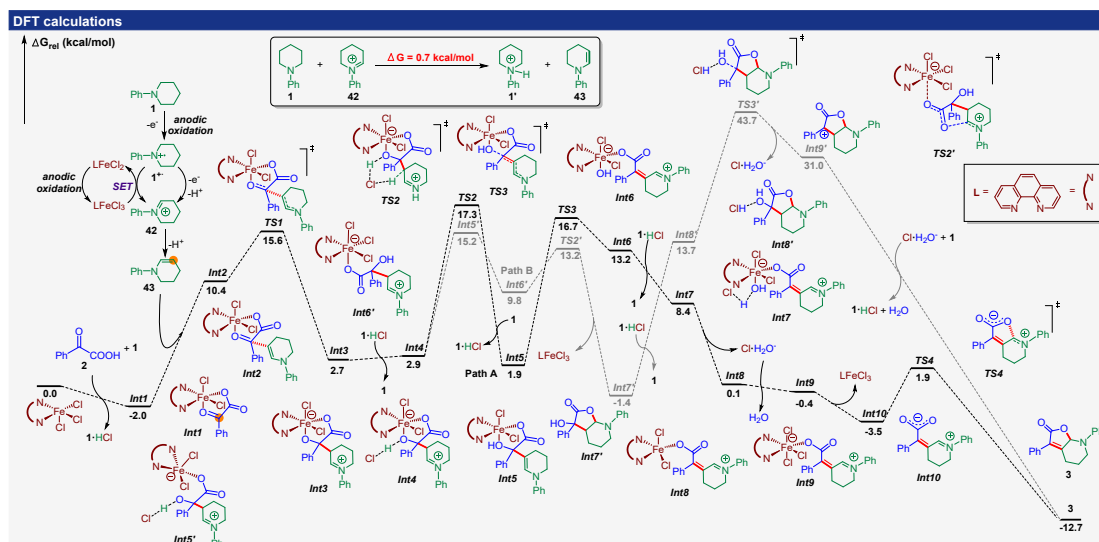

### 3D-structures of transition states:

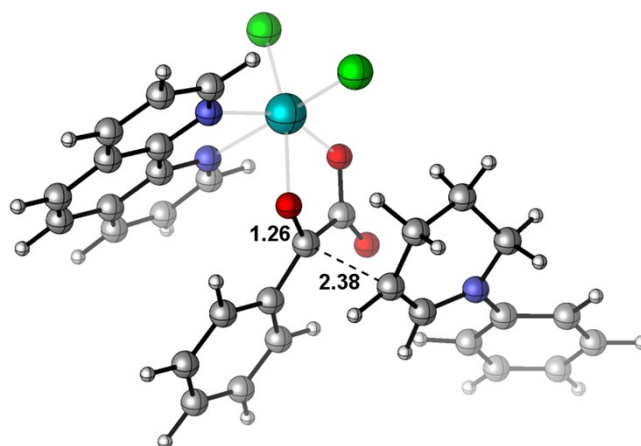

Figure S-5. 3D structure of TS1.

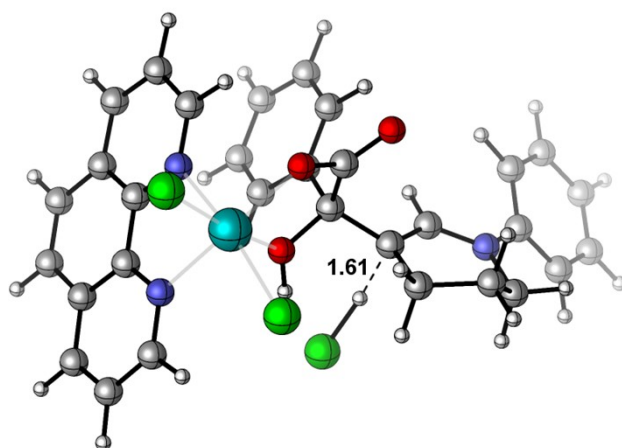

**Figure S-6.** 3D structure of TS2.

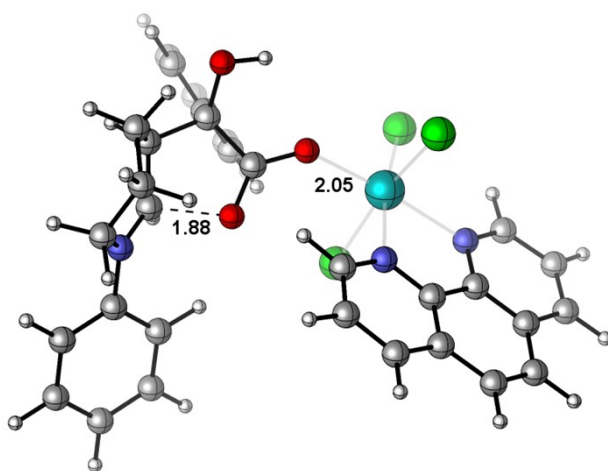

**Figure S-7.** 3D structure of TS2'.

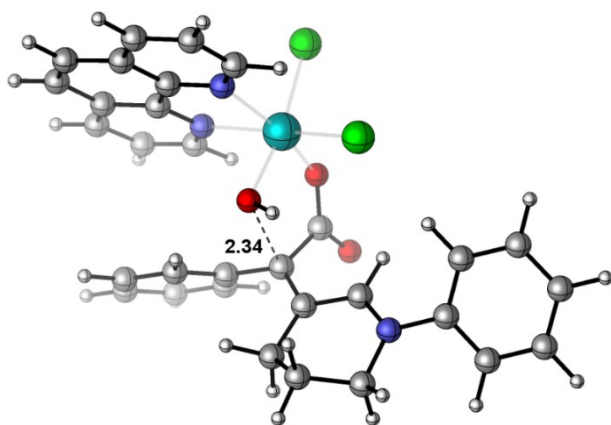

**Figure S-8.** 3D structure of TS3.

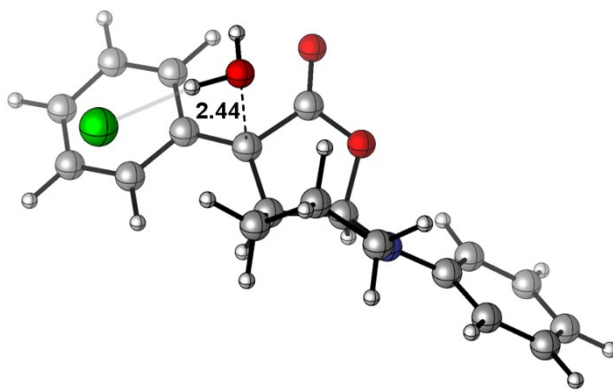

**Figure S-9.** 3D structure of TS3'.

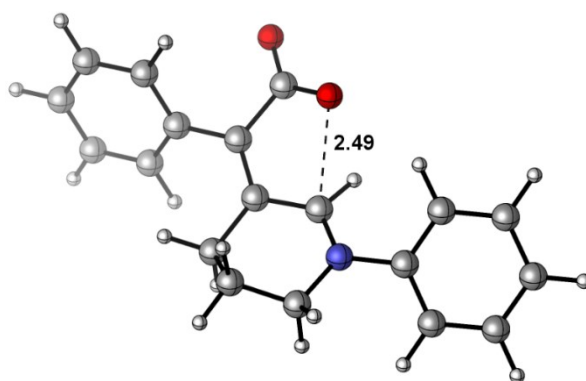

**Figure S-10.** 3D structure of TS4.

**Fitting procedure of harmonic vibrational frequency scale factor:**

The whole fitting procedure mainly referred to Merrick *et al*'s work<sup>18</sup>. According to the knowledge of statistical mechanics, in molecular vibration, for every single normal mode with a frequency  $\nu_i$  (wavenumber  $\tilde{\nu}_i$ ), its contribution to the zero-point energy (ZPE), thermal energy (U, ZPE excluded) and entropy (S) can be individually evaluated by formulas (S.4), (S.5), and (S.6):

$$ZPE_{vib,m}(\tilde{\nu}_i) = \frac{1}{2}N_A h c \tilde{\nu}_i \quad (S.4)$$

$$\Delta U_{vib,m}(\tilde{\nu}_i) = N_A h c \frac{\tilde{\nu}_i}{e^{\mu_i} - 1} \quad (S.5)$$

$$\Delta S_{vib,m}(\tilde{\nu}_i) = R \left[ \frac{\mu_i}{e^{\mu_i} - 1} - \ln(1 - e^{-\mu_i}) \right] \quad (S.6)$$

Where the temperature is set to 298.15K,  $N_A$  is Avogadro's constant,  $c$  is the speed

of light, and  $\mu_i$  suffices formula (S.7):

$$\mu_i = \frac{hc\tilde{\nu}_i}{kT} \quad (S.7)$$

For a certain molecule, having obtained frequencies of all normal modes, the summation of formula (S.4), (S.5), and (S.6) equals vibrational contributions to the molecule's ZPE, thermal energy, and entropy individually.

With these theoretical bases, we prepared two test sets for experimental frequencies (with 27 molecules and 139 normal modes, see **Table S-2**) and ZPEs (with 18 experimental data, see **Table S-3**) individually. Computed wavenumbers were obtained by geometry optimization and vibration analysis for each molecule within the test set at the level of PBE0-D3(BJ)/def2-SVP, using Gaussian 16, Rev. A 03 software package with the UltraFine integration grid.

Having obtained all the experimental and computed wavenumbers ( $\tilde{\nu}_i^{Exp}$  and  $\tilde{\nu}_i^{Theor}$ ), now we can introduce the harmonic vibrational frequency scale factor  $\lambda_{ZPE}$ ,  $\lambda_U$  (for thermal energy), and  $\lambda_S$  (for entropy). The sum of squared residuals (SSR) is chosen as the function of  $\lambda$  to minimize:

$$SSR(ZPE) = \sum_i^{All\ normal\ modes} [ZPE_{vib,m}(\lambda_{ZPE} \cdot \tilde{\nu}_i^{Theor}) - ZPE_i^{Exp}]^2 \quad (S.8)$$

$$SSR(U) = \sum_i^{All\ normal\ modes} [\Delta U_{vib,m}(\lambda_U \cdot \tilde{\nu}_i^{Theor}) - \Delta U_{vib,m}(\tilde{\nu}_i^{Exp})]^2 \quad (S.9)$$

$$SSR(S) = \sum_i^{All\ normal\ modes} [\Delta S_{vib,m}(\lambda_S \cdot \tilde{\nu}_i^{Theor}) - \Delta S_{vib,m}(\tilde{\nu}_i^{Exp})]^2 \quad (S.10)$$

Substitute every wavenumber into formula (S.8)~(S.10), use the scale factor  $\lambda$  as the sole independent variable to minimize the SSR function via Scipy toolkit 1.8.1 in Python 3.9, with 0.95 as an initial guess value for optimization, and we can finally obtain the fitted harmonic vibrational frequency scale factor for ZPE ( $\lambda_{ZPE}$ , 0.9816), thermal energy ( $\lambda_U$ , 0.9525), and entropy ( $\lambda_S$ , 0.9576)

**Table S-2.** All molecules and their corresponding experimental frequencies (wavenumbers) of normal modes in our test set.

| Molecules                       | Wavenumbers of Normal Modes (cm <sup>-1</sup> )                                                        | Ref. |
|---------------------------------|--------------------------------------------------------------------------------------------------------|------|
| C <sub>2</sub> H <sub>2</sub>   | 612, 612, 730, 730, 1974, 3289, 3374                                                                   | 19   |
| C <sub>2</sub> H <sub>4</sub>   | 825, 943, 949, 1023, 1236, 1342, 1444, 1623, 2989, 3026, 3103, 3106                                    | 19   |
| C <sub>2</sub> H <sub>6</sub>   | 289, 822, 822, 995, 1190, 1190, 1379, 1388, 1468, 1468, 1469, 1469, 2896, 2954, 2969, 2969, 2985, 2985 | 19   |
| CBr <sub>2</sub>                | 196, 595, 641                                                                                          | 20b  |
| CH <sub>2</sub> Cl <sub>2</sub> | 282, 717, 758, 898, 1153, 1268, 1467, 2999, 3040                                                       | 19   |
| CH <sub>2</sub> O               | 1167, 1249, 1500, 1746, 2782, 2843                                                                     | 19   |
| CH <sub>3</sub> Cl              | 732, 1017, 1017, 1355, 1452, 1452, 2937, 3039, 3039                                                    | 19   |
| CH <sub>3</sub> OH              | 250, 1033, 1060, 1165, 1345, 1455, 1477, 1477, 2844, 2960, 3000, 3681                                  | 19   |
| CH <sub>4</sub>                 | 1306, 1306, 1306, 1534, 1534, 2917, 3019, 3019, 3019                                                   | 19   |
| Cl <sub>2</sub>                 | 554                                                                                                    | 19   |
| CO                              | 2143                                                                                                   | 19   |
| CO <sub>2</sub>                 | 667, 667, 1333, 2349                                                                                   | 19   |
| F <sub>2</sub>                  | 894                                                                                                    | 19   |
| H <sub>2</sub>                  | 4159                                                                                                   | 19   |
| H <sub>2</sub> O                | 1595, 3657, 3756                                                                                       | 19   |
| HCN                             | 712, 712, 2097, 3311                                                                                   | 19   |
| HCOOH                           | 625, 638, 1033, 1105, 1229, 1387, 1770, 2943, 3570                                                     | 19   |
| HF                              | 3959                                                                                                   | 19   |
| HNCO                            | 610, 643, 762, 1327, 2274, 3531                                                                        | 19   |
| HOBr                            | 626, 1164, 3590                                                                                        | 20c  |
| N <sub>2</sub>                  | 2330                                                                                                   | 19   |
| N <sub>2</sub> O                | 589, 589, 1285, 2224                                                                                   | 19   |
| NH <sub>3</sub>                 | 950, 1627, 1627, 3337, 3444, 3444                                                                      | 19   |
| NO <sub>2</sub> Br              | 282, 290, 606, 783, 1291, 1659                                                                         | 20a  |
| OH                              | 3568                                                                                                   | 19   |
| PH                              | 2276                                                                                                   | 19   |
| SH                              | 2592                                                                                                   | 19   |

**Table S-3.** All zero-point energy (ZPE) data in our test set.

| Molecules                     | ZPE (kJ/mol) | Ref. |
|-------------------------------|--------------|------|
| C <sub>2</sub> H <sub>2</sub> | 68.87        | 21   |
| C <sub>2</sub> H <sub>4</sub> | 131.67       | 22   |
| CH <sub>2</sub> O             | 69.16        | 22   |
| CH <sub>3</sub> Cl            | 98.11        | 23   |
| CH <sub>4</sub>               | 115.94       | 24   |
| Cl <sub>2</sub>               | 3.35         | 25   |
| CO                            | 12.93        | 25   |
| F <sub>2</sub>                | 5.44         | 25   |
| H <sub>2</sub>                | 25.98        | 25   |
| H <sub>2</sub> O              | 55.44        | 22   |
| HCN                           | 41.63        | 21   |
| HF                            | 24.48        | 25   |
| N <sub>2</sub>                | 14.06        | 25   |

|                  |       |    |
|------------------|-------|----|
| N <sub>2</sub> O | 28.49 | 26 |
| NH <sub>3</sub>  | 89.24 | 26 |
| OH               | 22.09 | 25 |
| PH               | 14.02 | 25 |
| SH               | 16.02 | 25 |

### Exploration of the most stable spin-state and configuration of Fe(phen)(PhCOCOO)Cl<sub>2</sub> and Fe(phen)Cl<sub>3</sub>.

Calculated and geometrically-optimized at the level of IEFPCM(MeCN)/(U)PBE0-D3(BJ)/def2-SVP, we started with the stereoisomer **Int1\_1**, where the benzoylformic acid anion lies on the plane of the ligand (phen). Firstly, the impacts of different spin multiplicity (S) on single-point energy (SPE, unit: a.u.) of **Int1\_1** were explored. As is shown in **Fig. S-11a**, **Int1\_1** with a spin multiplicity of 6 bears the lowest SPE, while **Int1\_1** with a spin multiplicity of 2 is 12.8 kcal/mol higher. The calculation for **Int1\_1** with the spin multiplicity of 4 cannot proceed because of SCF convergence failure arising from improper electron distribution. Because almost all other 6-coordinated intermediates and TSs have a similar coordination sphere, the optimal stability of spin multiplicity of 6 is extrapolated to other 6-coordinated intermediates and TSs. We then explored 4 different isomers of **Int1\_1**, and the calculated SPE of optimized geometries for the 4 different isomers are displayed in **Fig. S-11b**, with the most stable configuration of Fe(phen)(PhCOCOO)Cl<sub>2</sub> found. A similar procedure was taken to Fe(phen)Cl<sub>3</sub>, and the calculated SPE and SPE plus thermal corrections to Gibbs free energies (TCG, not scaled) results show that Fe(phen)Cl<sub>3</sub> with a configuration of square-pyramid and a spin multiplicity of 6 is slightly more thermodynamically favorable than that with a configuration of bipyramid and a spin multiplicity of 6 (See **Fig. S-11c**, an SCF convergence error would occur while spin multiplicity was set to 4 in bipyramid configuration or 2 in both configurations), which indicates that both of these configurations might exist simultaneously. Likewise, we consider all other 5-coordinated intermediates and TSs should have a spin multiplicity of 6.

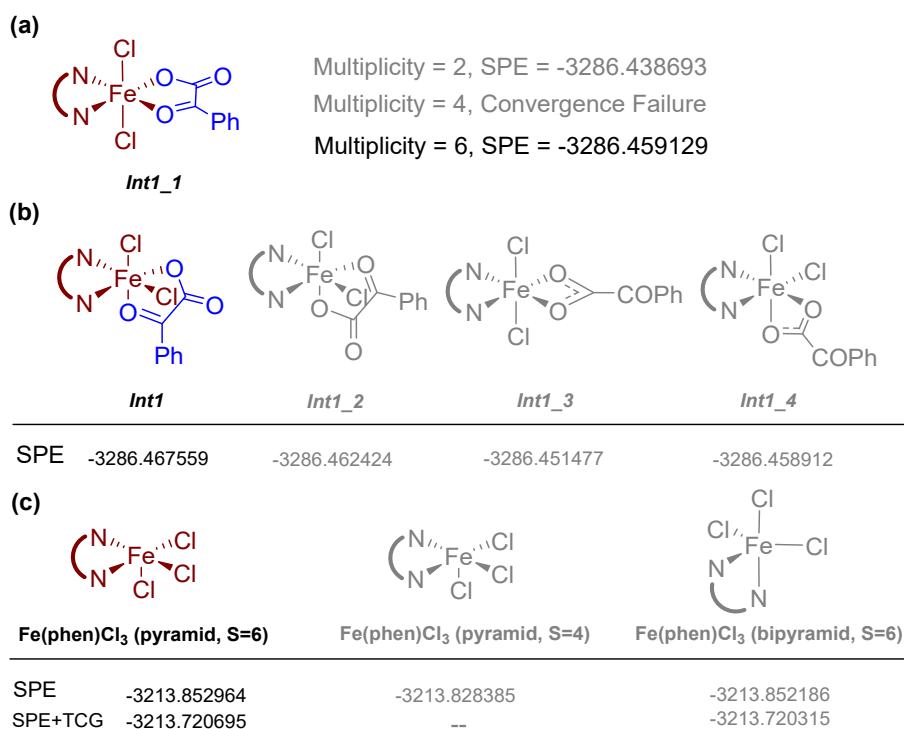

**Figure S-11.** Determination of optimal configuration and spin multiplicity for Fe(phen)(PhCOCOO)Cl<sub>2</sub> and Fe(phen)Cl<sub>3</sub>.

### Int4's deprotonation by 1.

Aside from chloride anion, in the  $\alpha$ -H deprotonation step (from **Int4** to **Int5**), we believed that N-phenylpiperidine(**1**) might also act as a base. We have also found the TS of **Int4**'s deprotonation by **1** (**TS2''**, **Fig. S-12**), however, with a much higher energy barrier (**Fig. S-13**, 35.0 kcal/mol), probably because of the strong steric hindrance.

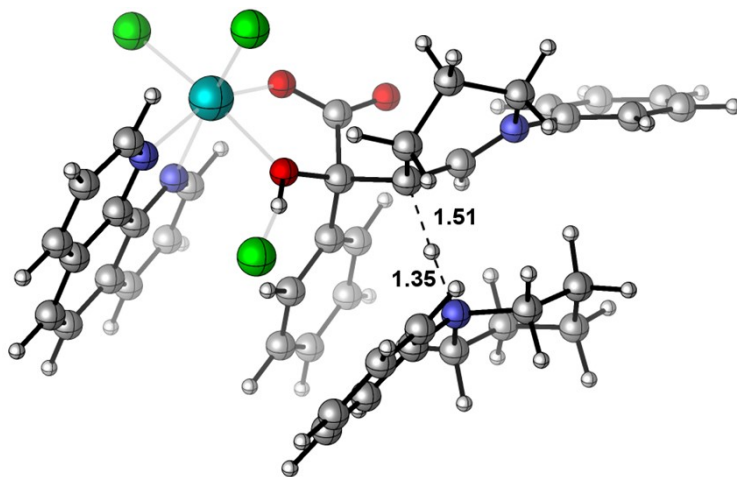

**Figure S-12.** 3D structure of **TS2''**.

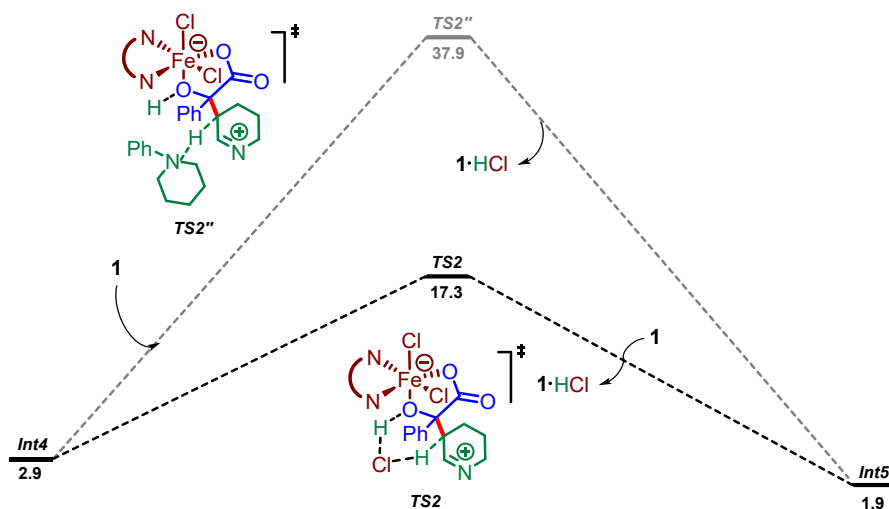

**Figure S-13.** Potential surfaces of **Int4**'s deprotonation, by chloride anion intramolecularly (black) and **1** (grey).

### Dissociation before ring-closure vs. ring-closure before dissociation

There exist two possible pathways from **Int9** to product **3**, namely dissociation before ring-closure, and ring-closure before dissociation. The two pathways were both calculated, shown in **Fig. S-14**, which indicates that the pathway of dissociation before ring-closure is slightly favorable, in terms of energy barrier in the ring-closure-step (5.4 kcal/mol vs. 6.4 kcal/mol).

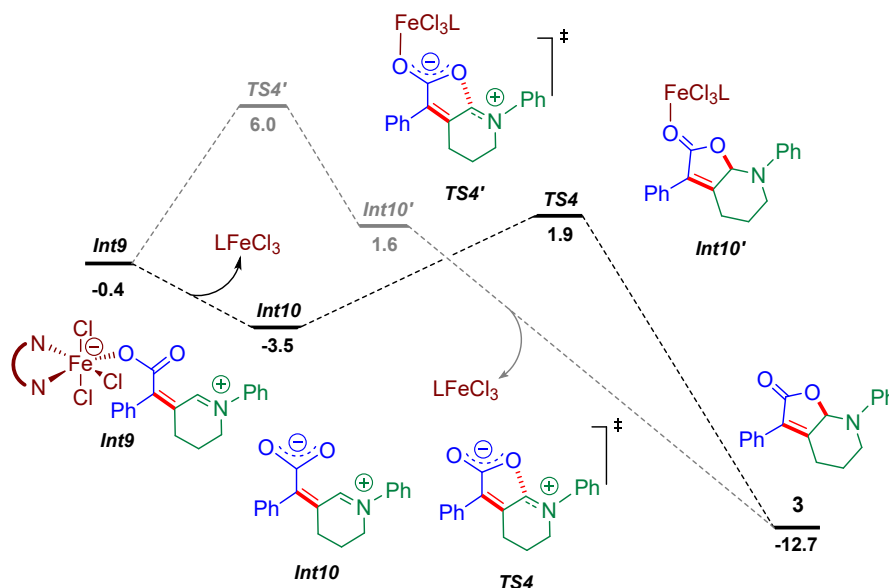



**Figure S-14.** Potential surfaces of **Int9**'s dissociation before ring-closure pathway (black) and ring-closure before dissociation pathway (grey).

### Computed energies of stationary points

**Table S-4.** Thermal corrections to Gibbs free energies (TCG), single-point energies (SPE), and unscaled wavenumbers of imaginary frequencies (WIF) of transition states.

| Structures                    | SPE <sup>a</sup> (Hartree) | TCG <sup>b</sup> (Hartree) | WIF <sup>b</sup> (cm <sup>-1</sup> ) |
|-------------------------------|----------------------------|----------------------------|--------------------------------------|
| <b>1</b>                      | -482.585240                | 0.194163                   |                                      |
| <b>1'</b>                     | -483.046852                | 0.208833                   |                                      |
| <b>1·HCl</b>                  | -943.294699                | 0.204382                   |                                      |
| <b>2</b>                      | -533.778484                | 0.082814                   |                                      |
| <b>3</b>                      | -938.787389                | 0.262444                   |                                      |
| <b>42</b>                     | -481.828556                | 0.183956                   |                                      |
| <b>43</b>                     | -481.367630                | 0.171094                   |                                      |
| <b>Cl·H<sub>2</sub>O</b>      | -536.630233                | -0.006505                  |                                      |
| <b>H<sub>2</sub>O</b>         | -76.3876866                | 0.000181                   |                                      |
| <b>Fe(phen)Cl<sub>3</sub></b> | -3215.115469               | 0.121241                   |                                      |
| <b>Int1</b>                   | -3288.217109               | 0.223194                   |                                      |
| <b>Int10</b>                  | -938.769646                | 0.25938                    |                                      |
| <b>Int10'</b>                 | -4153.910874               | 0.414552                   |                                      |
| <b>Int2</b>                   | -3769.591847               | 0.421297                   |                                      |
| <b>Int3</b>                   | -3769.611374               | 0.428407                   |                                      |
| <b>Int4</b>                   | -4230.319635               | 0.437784                   |                                      |
| <b>Int5</b>                   | -3769.610894               | 0.426781                   |                                      |
| <b>Int5'</b>                  | -4230.299154               | 0.436925                   |                                      |
| <b>Int6</b>                   | -3769.588467               | 0.422263                   |                                      |
| <b>Int6'</b>                  | -4230.306442               | 0.435586                   |                                      |
| <b>Int7</b>                   | -4230.307167               | 0.434116                   |                                      |
| <b>Int7'</b>                  | -1015.182624               | 0.288252                   |                                      |
| <b>Int8</b>                   | -3693.663609               | 0.414114                   |                                      |
| <b>Int8'</b>                  | -1475.862203               | 0.29271                    |                                      |
| <b>Int9</b>                   | -4153.910465               | 0.410807                   |                                      |
| <b>Int9'</b>                  | -939.179435                | 0.2736                     |                                      |
| <b>TS1</b>                    | -3769.588095               | 0.425717                   | 102.92i                              |
| <b>TS2'</b>                   | -4230.302634               | 0.437143                   | 187.18i                              |
| <b>TS2''</b>                  | -4712.876908               | 0.659703                   | 1374.80i                             |
| <b>TS2</b>                    | -4230.291196               | 0.432269                   | 207.12i                              |
| <b>TS3'</b>                   | -1475.814810               | 0.294619                   | 102.70i                              |

|             |              |          |         |
|-------------|--------------|----------|---------|
| <b>TS3</b>  | -3769.583870 | 0.423245 | 131.61i |
| <b>TS4'</b> | -4153.900989 | 0.411566 | -76.01i |
| <b>TS4</b>  | -938.762698  | 0.260934 | 47.50i  |

<sup>a</sup>Computed at the SMD<sup>11</sup>(MeCN)/PBE0<sup>9</sup>-D3<sup>7</sup>(BJ<sup>8</sup>)/ma-TZVP<sup>11</sup> level.

<sup>b</sup>Computed at the IEFPCM<sup>13</sup>(MeCN)/PBE0<sup>9</sup>-D3<sup>7</sup>(BJ<sup>8</sup>)/def2-SVP<sup>12</sup> level.

### Cartesian Coordinates of Stationary Points (Unit of length: Å)

#### Cl·H<sub>2</sub>O<sup>-</sup>

Charge = -1 Spin Multiplicity = 1

H 0.74302147 0.05243054 -0.09866144  
H 1.91784801 -0.76085742 0.39505198  
O 1.73179488 0.03033736 -0.12226727  
Cl -1.32405236 -0.08506750 0.07051873

#### H<sub>2</sub>O

Charge = 0 Spin Multiplicity = 1

O 2.83041287 0.60873151 0.00000000  
H 3.79270755 0.66684705 0.00000000  
H 2.56397441 1.53522977 0.00000000

#### Int1

Charge = 0 Spin Multiplicity = 6

Fe 0.42052128 1.58996957 0.04040090  
N 1.03057074 -0.07029303 1.34863562  
C 1.84974676 -0.96471987 0.76454573  
C 0.70084281 -0.21541358 2.61940101  
C 2.37184656 -2.08105996 1.45232470  
C 2.19305058 -0.74397453 -0.61010147  
C 1.17049378 -1.29195067 3.39005969  
H 0.04329700 0.54789121 3.04251627

|    |             |             |             |
|----|-------------|-------------|-------------|
| C  | 2.00204846  | -2.22690351 | 2.80688488  |
| C  | 3.23426595  | -2.98843250 | 0.75434880  |
| C  | 3.04768314  | -1.65076715 | -1.27223438 |
| N  | 1.67677658  | 0.34552372  | -1.21743978 |
| H  | 0.87141589  | -1.37442149 | 4.43563954  |
| H  | 2.37962847  | -3.07566230 | 3.38157930  |
| C  | 3.55735620  | -2.78198431 | -0.55380570 |
| H  | 3.63005171  | -3.85097296 | 1.29425242  |
| C  | 3.35126103  | -1.37628651 | -2.62311868 |
| C  | 1.97142987  | 0.58601307  | -2.48459697 |
| H  | 4.21560122  | -3.47715445 | -1.07879153 |
| H  | 4.00926369  | -2.05015579 | -3.17650024 |
| C  | 2.81271961  | -0.25837195 | -3.22676897 |
| H  | 1.51677116  | 1.47872630  | -2.92162554 |
| H  | 3.02710925  | -0.01842668 | -4.26883398 |
| Cl | 2.04797087  | 2.86073175  | 0.92848604  |
| O  | -1.08479331 | 1.90388225  | 1.27582052  |
| C  | -2.22136266 | 1.32061274  | 1.14586799  |
| C  | -2.16784604 | 0.18968925  | 0.07645852  |
| O  | -3.23350033 | 1.58074328  | 1.76506899  |
| C  | -3.28730455 | -0.70344827 | -0.23327150 |
| O  | -1.09754589 | 0.07926388  | -0.51828639 |
| C  | -4.51845268 | -0.65922083 | 0.44517611  |
| C  | -3.09303232 | -1.65039413 | -1.25799797 |
| C  | -5.53065743 | -1.54870417 | 0.09845031  |
| H  | -4.66138198 | 0.07741415  | 1.23403432  |
| C  | -4.10786470 | -2.53188640 | -1.59846046 |
| H  | -2.13264876 | -1.67383864 | -1.77577191 |
| C  | -5.32912423 | -2.48151979 | -0.91894315 |
| H  | -6.48582698 | -1.51332491 | 0.62649593  |

|    |             |             |             |
|----|-------------|-------------|-------------|
| H  | -3.95326923 | -3.26287428 | -2.39482966 |
| H  | -6.12897266 | -3.17618422 | -1.18665998 |
| Cl | -0.33057283 | 2.84931674  | -1.70552933 |

### Int10'

Charge = 0 Spin Multiplicity = 6

|   |             |             |             |
|---|-------------|-------------|-------------|
| O | 1.13253306  | 0.71538873  | -0.76819302 |
| C | 1.84063191  | -0.34129255 | -0.42630178 |
| C | 3.26873437  | -0.00243606 | -0.38049100 |
| O | 1.30220866  | -1.40602707 | -0.15372064 |
| C | 4.31183363  | -0.95719838 | 0.00697922  |
| C | 4.05372905  | -1.93612272 | 0.98106782  |
| C | 5.58179602  | -0.90535209 | -0.58780820 |
| C | 5.05514240  | -2.82553248 | 1.36171632  |
| H | 3.06448605  | -2.00161480 | 1.43743815  |
| C | 6.57893123  | -1.79733997 | -0.20248713 |
| H | 5.78086847  | -0.17531346 | -1.37541917 |
| C | 6.31955560  | -2.75735846 | 0.77595932  |
| H | 4.84473093  | -3.57968536 | 2.12358105  |
| H | 7.56183706  | -1.74798607 | -0.67657770 |
| H | 7.10152364  | -3.45864723 | 1.07644006  |
| C | 3.35482401  | 1.31849651  | -0.66982582 |
| C | 1.98791865  | 1.83697665  | -1.01418818 |
| H | 1.90578190  | 2.02415478  | -2.10574684 |
| N | 1.57019026  | 2.96158611  | -0.23879866 |
| C | 2.59550178  | 3.87677080  | 0.26297265  |
| H | 2.78583463  | 4.67226527  | -0.48375039 |
| H | 2.20097104  | 4.37143946  | 1.16043527  |
| C | 0.29383126  | 3.48956526  | -0.49720560 |
| C | -0.66249594 | 2.78242255  | -1.25669923 |

|    |             |             |             |
|----|-------------|-------------|-------------|
| C  | -0.09049852 | 4.73675548  | 0.03349236  |
| C  | -1.94763143 | 3.28603021  | -1.42941922 |
| H  | -0.44832007 | 1.79993909  | -1.67294323 |
| C  | -1.38298161 | 5.22449076  | -0.14637719 |
| H  | 0.61061735  | 5.34083644  | 0.60631945  |
| C  | -2.32962629 | 4.50496293  | -0.87194860 |
| H  | -2.66461592 | 2.69155013  | -2.00168767 |
| H  | -1.64528627 | 6.19073851  | 0.29205908  |
| H  | -3.34372380 | 4.88816535  | -1.00304868 |
| C  | 3.90360277  | 3.21077279  | 0.64317288  |
| H  | 4.63442158  | 3.99955354  | 0.87335069  |
| H  | 3.76937980  | 2.61220164  | 1.55815221  |
| C  | 4.43883357  | 2.29862379  | -0.46626110 |
| H  | 4.62224676  | 2.88114152  | -1.38464690 |
| H  | 5.37761181  | 1.81426539  | -0.17139798 |
| Fe | -0.74944960 | -1.95977147 | 0.00134487  |
| N  | -1.40656595 | -0.07062136 | 0.99124597  |
| C  | -2.73785935 | 0.12480944  | 0.91499420  |
| C  | -0.65325280 | 0.84825715  | 1.56408879  |
| C  | -3.35623859 | 1.32116799  | 1.33808360  |
| C  | -3.54186901 | -0.96243207 | 0.43572308  |
| C  | -1.17473433 | 2.06588892  | 2.03120817  |
| H  | 0.40912835  | 0.62669163  | 1.67048450  |
| C  | -2.52288843 | 2.31650186  | 1.89236965  |
| C  | -4.77720719 | 1.45579430  | 1.21125726  |
| C  | -4.94367511 | -0.81535437 | 0.35379541  |
| N  | -2.91555333 | -2.11282633 | 0.10859559  |
| H  | -0.50347942 | 2.79919396  | 2.47824249  |
| H  | -2.95547642 | 3.26372435  | 2.22068805  |
| C  | -5.53974133 | 0.43123271  | 0.73526440  |

|    |             |             |             |
|----|-------------|-------------|-------------|
| H  | -5.23930758 | 2.39641818  | 1.51819729  |
| C  | -5.68293571 | -1.93135502 | -0.09375187 |
| C  | -3.62400387 | -3.14997893 | -0.30324137 |
| H  | -6.62335304 | 0.53685234  | 0.65147312  |
| H  | -6.76994510 | -1.86060982 | -0.17599325 |
| C  | -5.02284072 | -3.09956527 | -0.41513478 |
| H  | -3.05426683 | -4.04497809 | -0.56642533 |
| H  | -5.56529283 | -3.98152062 | -0.75784423 |
| Cl | -0.29199510 | -2.60837158 | 2.18666062  |
| Cl | -0.46856170 | -4.04491700 | -0.90123127 |
| Cl | -1.17621995 | -0.88717186 | -2.04312185 |

### Int10

Charge = 0 Spin Multiplicity = 1

|   |             |            |             |
|---|-------------|------------|-------------|
| O | -2.95809989 | 3.44604854 | 0.75634973  |
| C | -2.37370014 | 2.34839009 | 0.77522575  |
| C | -1.81586544 | 1.94786955 | -0.59666750 |
| O | -2.21010242 | 1.55192176 | 1.71272687  |
| C | -0.72085568 | 2.75897702 | -1.14197063 |
| C | -0.70779822 | 4.15941200 | -1.00425792 |
| C | 0.37442276  | 2.13374452 | -1.76705625 |
| C | 0.35727418  | 4.90648724 | -1.49684778 |
| H | -1.55778313 | 4.63222640 | -0.51117213 |
| C | 1.44659799  | 2.88451980 | -2.23866243 |
| H | 0.40270631  | 1.04594120 | -1.84932128 |
| C | 1.43773840  | 4.27427750 | -2.11408206 |
| H | 0.34501791  | 5.99438458 | -1.39622332 |
| H | 2.29544753  | 2.38005706 | -2.70590735 |
| H | 2.27513441  | 4.86398975 | -2.49459665 |
| C | -2.37350149 | 0.89855076 | -1.30545963 |

|   |             |             |             |
|---|-------------|-------------|-------------|
| C | -3.31347967 | 0.08883101  | -0.61898172 |
| H | -3.44210897 | 0.24678180  | 0.45558922  |
| N | -4.00224485 | -0.88824413 | -1.16581026 |
| C | -3.85153395 | -1.21512647 | -2.59175465 |
| H | -3.13933138 | -2.05089830 | -2.68137085 |
| H | -4.82767215 | -1.56612032 | -2.95056534 |
| C | -4.91746070 | -1.65780734 | -0.38906809 |
| C | -5.69510789 | -1.03668990 | 0.59280624  |
| C | -5.03866639 | -3.03031767 | -0.62344641 |
| C | -6.57549570 | -1.79848064 | 1.35564012  |
| H | -5.63140552 | 0.04228722  | 0.74565617  |
| C | -5.92736870 | -3.78021233 | 0.14272840  |
| H | -4.43032586 | -3.52030948 | -1.38461850 |
| C | -6.69451596 | -3.17039743 | 1.13471990  |
| H | -7.18443120 | -1.30870128 | 2.11835806  |
| H | -6.01365526 | -4.85394735 | -0.03654221 |
| H | -7.39099014 | -3.76325812 | 1.73121546  |
| C | -3.37503645 | -0.01093818 | -3.37551995 |
| H | -3.19173953 | -0.32298293 | -4.41303548 |
| H | -4.17401392 | 0.74771753  | -3.39925002 |
| C | -2.11601491 | 0.57874763  | -2.75573666 |
| H | -1.29128413 | -0.14750796 | -2.85036682 |
| H | -1.80112638 | 1.48258068  | -3.29501768 |

### Int1\_1

Charge = 0 Spin Multiplicity = 6

|    |             |             |             |
|----|-------------|-------------|-------------|
| Fe | -0.47271618 | 1.20392272  | 0.01150523  |
| N  | 1.61819441  | 0.65299950  | 0.00614169  |
| C  | 2.48081156  | 1.69200468  | -0.02396754 |
| C  | 2.08477586  | -0.58559412 | 0.02937038  |

|    |             |             |             |
|----|-------------|-------------|-------------|
| C  | 3.88121110  | 1.51302869  | -0.03174896 |
| C  | 1.93199840  | 3.01850727  | -0.04874964 |
| C  | 3.46146332  | -0.86184074 | 0.02384119  |
| H  | 1.33342239  | -1.37832920 | 0.05311250  |
| C  | 4.35991788  | 0.18516360  | -0.00661090 |
| C  | 4.73363446  | 2.66571250  | -0.06426316 |
| C  | 2.79451552  | 4.13666632  | -0.08071723 |
| N  | 0.59092312  | 3.13809202  | -0.04033708 |
| H  | 3.79968743  | -1.89867376 | 0.04369362  |
| H  | 5.43639290  | -0.00135250 | -0.01152348 |
| C  | 4.21250191  | 3.92502709  | -0.08776537 |
| H  | 5.81503736  | 2.51294631  | -0.06987347 |
| C  | 2.18904651  | 5.41161803  | -0.10408702 |
| C  | 0.04034030  | 4.33793919  | -0.06252601 |
| H  | 4.87018196  | 4.79660838  | -0.11249834 |
| H  | 2.81454584  | 6.30694254  | -0.12915756 |
| C  | 0.81212499  | 5.51138897  | -0.09499726 |
| H  | -1.05215585 | 4.38387803  | -0.05452696 |
| H  | 0.31474707  | 6.48207836  | -0.11253530 |
| Cl | -0.68412312 | 1.48236945  | -2.25758348 |
| Cl | -0.64696293 | 1.58327241  | 2.26907275  |
| O  | -0.83171208 | -0.75904183 | 0.05842864  |
| C  | -2.01660239 | -1.24532937 | 0.07836008  |
| C  | -3.09545314 | -0.12153168 | 0.06212903  |
| O  | -2.30987772 | -2.42513130 | 0.10661374  |
| C  | -4.54300056 | -0.35892158 | 0.07897267  |
| O  | -2.65302874 | 1.02557405  | 0.03328739  |
| C  | -5.11120061 | -1.64550393 | 0.11175467  |
| C  | -5.38643921 | 0.76998556  | 0.06100561  |
| C  | -6.49541160 | -1.79075326 | 0.12604371  |



|   |             |             |            |
|---|-------------|-------------|------------|
| H | -4.45342445 | -2.51338829 | 0.12552641 |
| C | -6.76486379 | 0.61625358  | 0.07542983 |
| H | -4.93555958 | 1.76360853  | 0.03561478 |
| C | -7.32119644 | -0.66647131 | 0.10799198 |
| H | -6.93387432 | -2.79074630 | 0.15146388 |
| H | -7.41303190 | 1.49523614  | 0.06138534 |
| H | -8.40726835 | -0.78787781 | 0.11936098 |

### Int1\_1 (S=2)

Charge = 0 Spin Multiplicity = 2

|    |             |             |             |
|----|-------------|-------------|-------------|
| Fe | -0.12902797 | -0.35459833 | -0.00145201 |
| N  | -1.87524564 | -1.21642865 | -0.00077881 |
| C  | -2.90271086 | -0.34282208 | -0.00151303 |
| C  | -2.12385976 | -2.51533549 | 0.00001697  |
| C  | -4.25391167 | -0.73226817 | -0.00131318 |
| C  | -2.54326447 | 1.03244374  | -0.00258916 |
| C  | -3.44176342 | -3.00389558 | 0.00024031  |
| H  | -1.25560221 | -3.17787982 | 0.00053653  |
| C  | -4.50629817 | -2.12141757 | -0.00038584 |
| C  | -5.25341183 | 0.29890757  | -0.00209295 |
| C  | -3.53265849 | 2.03213972  | -0.00331867 |
| N  | -1.22005961 | 1.29178269  | -0.00286495 |
| H  | -3.60665468 | -4.08211988 | 0.00092105  |
| H  | -5.53488745 | -2.48918550 | -0.00018739 |
| C  | -4.90853859 | 1.62086640  | -0.00303080 |
| H  | -6.30524656 | 0.00523493  | -0.00192038 |
| C  | -3.07453765 | 3.36742698  | -0.00428122 |
| C  | -0.80450962 | 2.54649255  | -0.00373322 |
| H  | -5.68292307 | 2.39093734  | -0.00359652 |
| H  | -3.79204937 | 4.19108200  | -0.00487540 |

|    |             |             |             |
|----|-------------|-------------|-------------|
| C  | -1.71443311 | 3.61749015  | -0.00446020 |
| H  | 0.27539761  | 2.71098300  | -0.00390225 |
| H  | -1.33128186 | 4.63873107  | -0.00517537 |
| Cl | -0.12363549 | -0.27608674 | 2.25557318  |
| Cl | -0.12344541 | -0.28016148 | -2.25860245 |
| O  | 0.88599419  | -1.95246510 | 0.00002472  |
| C  | 2.16393966  | -1.83407483 | -0.00135225 |
| C  | 2.58773991  | -0.34400873 | -0.00185032 |
| O  | 2.96543169  | -2.74852487 | -0.00226504 |
| C  | 3.96662987  | 0.13605778  | -0.00206339 |
| O  | 1.64660416  | 0.46100076  | -0.00222457 |
| C  | 5.07061778  | -0.73737049 | -0.00063384 |
| C  | 4.18308751  | 1.52931571  | -0.00359045 |
| C  | 6.36182237  | -0.21932119 | -0.00069644 |
| H  | 4.89315242  | -1.81212345 | 0.00046464  |
| C  | 5.47372270  | 2.03606617  | -0.00371084 |
| H  | 3.32210202  | 2.19979562  | -0.00468930 |
| C  | 6.56512007  | 1.16094692  | -0.00224766 |
| H  | 7.21726260  | -0.89819568 | 0.00045258  |
| H  | 5.63693540  | 3.11586742  | -0.00493721 |
| H  | 7.58193801  | 1.56142209  | -0.00232286 |

## Int1\_2

Charge = 0 Spin Multiplicity = 6

|    |             |             |             |
|----|-------------|-------------|-------------|
| Fe | -0.19994190 | -0.96559021 | 0.54904759  |
| N  | -0.91147986 | 1.14290814  | 0.52338629  |
| C  | -2.16740034 | 1.27585068  | 0.05442239  |
| C  | -0.24569007 | 2.21389908  | 0.91541751  |
| C  | -2.80761817 | 2.52971712  | -0.06197829 |
| C  | -2.86807326 | 0.07889159  | -0.31828326 |

|    |             |             |             |
|----|-------------|-------------|-------------|
| C  | -0.79413097 | 3.50530809  | 0.83865794  |
| H  | 0.76020380  | 2.05339354  | 1.31239006  |
| C  | -2.07292539 | 3.66457187  | 0.34469989  |
| C  | -4.14637009 | 2.58741416  | -0.57126262 |
| C  | -4.18911217 | 0.16471146  | -0.80912455 |
| N  | -2.22666987 | -1.10133566 | -0.17009247 |
| H  | -0.20365168 | 4.36071428  | 1.16962018  |
| H  | -2.52513686 | 4.65633623  | 0.27092313  |
| C  | -4.80876390 | 1.45195540  | -0.93110430 |
| H  | -4.62809833 | 3.56326910  | -0.66259291 |
| C  | -4.82950183 | -1.04631994 | -1.15018808 |
| C  | -2.84387625 | -2.22685887 | -0.49517156 |
| H  | -5.82948605 | 1.50304937  | -1.31592655 |
| H  | -5.85187913 | -1.02651083 | -1.53500086 |
| C  | -4.15675912 | -2.24063150 | -0.99172431 |
| H  | -2.26994334 | -3.14717037 | -0.35809724 |
| H  | -4.62376359 | -3.19326627 | -1.24491367 |
| Cl | -0.54567442 | -0.89366154 | 2.79391099  |
| O  | 0.36543039  | -0.53183921 | -1.34997909 |
| C  | 1.56701727  | -0.20777065 | -1.62567208 |
| C  | 2.42753116  | -0.08034881 | -0.33009737 |
| O  | 2.03644559  | -0.00113584 | -2.73061927 |
| C  | 3.84913718  | 0.25648902  | -0.30009948 |
| O  | 1.81368304  | -0.28551116 | 0.72364237  |
| C  | 4.59274573  | 0.53256465  | -1.46356594 |
| C  | 4.48525273  | 0.30079045  | 0.95799357  |
| C  | 5.94415146  | 0.84617815  | -1.36134875 |
| H  | 4.09138956  | 0.49517364  | -2.42984027 |
| C  | 5.83281752  | 0.61377389  | 1.04964456  |
| H  | 3.89952233  | 0.08251611  | 1.85273221  |

|    |            |             |             |
|----|------------|-------------|-------------|
| C  | 6.56353516 | 0.88724575  | -0.11158917 |
| H  | 6.52001457 | 1.06042359  | -2.26421990 |
| H  | 6.32196137 | 0.64566729  | 2.02554594  |
| H  | 7.62578247 | 1.13372607  | -0.03890307 |
| Cl | 0.29121125 | -3.17944085 | 0.31257645  |

### Int1\_3

Charge = 0 Spin Multiplicity = 6

|    |             |             |             |
|----|-------------|-------------|-------------|
| Fe | -0.17126800 | 0.15863100  | 0.66583100  |
| N  | -1.57297100 | -1.30098900 | -0.06411800 |
| C  | -2.78798200 | -0.82022000 | -0.39524100 |
| C  | -1.28990300 | -2.57538200 | -0.27698800 |
| C  | -3.79518700 | -1.63120300 | -0.96763500 |
| C  | -3.04374800 | 0.56539200  | -0.13598800 |
| C  | -2.22895000 | -3.46163600 | -0.82791700 |
| H  | -0.29026900 | -2.90865900 | 0.01214500  |
| C  | -3.48128900 | -2.98955300 | -1.17378300 |
| C  | -5.06445700 | -1.04268700 | -1.28610800 |
| C  | -4.29893600 | 1.11988900  | -0.46251300 |
| N  | -2.04599000 | 1.28537600  | 0.40852900  |
| H  | -1.96042600 | -4.50937500 | -0.96894300 |
| H  | -4.23228700 | -3.65607000 | -1.60494000 |
| C  | -5.30347800 | 0.27825000  | -1.04489400 |
| H  | -5.83428600 | -1.67119600 | -1.73830600 |
| C  | -4.48410700 | 2.49351500  | -0.19034500 |
| C  | -2.23595700 | 2.56521900  | 0.66431300  |
| H  | -6.27039000 | 0.71953000  | -1.29646000 |
| H  | -5.43681000 | 2.96981800  | -0.43122700 |
| C  | -3.44795400 | 3.21415900  | 0.37190900  |
| H  | -1.40120400 | 3.11057200  | 1.11403700  |

|    |             |             |             |
|----|-------------|-------------|-------------|
| H  | -3.55265100 | 4.27592400  | 0.60164200  |
| Cl | -0.55078300 | 0.12521800  | 2.89482100  |
| Cl | 0.14326800  | 1.04678000  | -1.43225800 |
| O  | 1.23846000  | -1.36989600 | 0.57577100  |
| C  | 2.17314100  | -0.55515400 | 0.82492600  |
| C  | 3.63916600  | -0.93455500 | 0.82317800  |
| O  | 1.89435400  | 0.63536400  | 1.08289300  |
| C  | 4.52154600  | -0.19655300 | -0.11075300 |
| O  | 4.02468000  | -1.73689400 | 1.63827500  |
| C  | 4.01914600  | 0.77542300  | -0.98798100 |
| C  | 5.88711900  | -0.49705300 | -0.11425000 |
| C  | 4.88395300  | 1.42461100  | -1.86702100 |
| H  | 2.96392500  | 1.05859800  | -1.02759900 |
| C  | 6.75088000  | 0.15278300  | -0.98970100 |
| H  | 6.26038100  | -1.25618400 | 0.58021700  |
| C  | 6.24832700  | 1.11238100  | -1.86994100 |
| H  | 4.49319800  | 2.18091900  | -2.54988500 |
| H  | 7.81628300  | -0.08753100 | -0.99449100 |
| H  | 6.93003200  | 1.62023200  | -2.55733900 |

#### Int1\_4

Charge = 0 Spin Multiplicity = 6

|    |            |             |             |
|----|------------|-------------|-------------|
| Fe | 0.23014542 | 1.36023709  | -0.13089105 |
| N  | 1.09763307 | 0.03758046  | 1.40148579  |
| C  | 1.98367391 | -0.85233070 | 0.91380757  |
| C  | 0.87710263 | 0.09388370  | 2.70360074  |
| C  | 2.69346198 | -1.75169965 | 1.73825612  |
| C  | 2.19386000 | -0.86244780 | -0.50493161 |
| C  | 1.53698168 | -0.75612429 | 3.60703116  |
| H  | 0.14593655 | 0.83131163  | 3.04459387  |

|    |             |             |             |
|----|-------------|-------------|-------------|
| C  | 2.44324550  | -1.67960951 | 3.12599491  |
| C  | 3.61173512  | -2.67323057 | 1.13596970  |
| C  | 3.10197203  | -1.78155793 | -1.07242281 |
| N  | 1.49924498  | 0.02755199  | -1.24827977 |
| H  | 1.32253381  | -0.67563488 | 4.67352452  |
| H  | 2.96902309  | -2.35423612 | 3.80572689  |
| C  | 3.80600726  | -2.68858952 | -0.21332817 |
| H  | 4.15439861  | -3.36607348 | 1.78255031  |
| C  | 3.26082588  | -1.74444420 | -2.47476295 |
| C  | 1.66081610  | 0.04552727  | -2.56291521 |
| H  | 4.50628178  | -3.39446758 | -0.66484306 |
| H  | 3.95264200  | -2.43783992 | -2.95872830 |
| C  | 2.53919171  | -0.83212795 | -3.21757862 |
| H  | 1.06759385  | 0.78179781  | -3.11131559 |
| H  | 2.63823355  | -0.77905472 | -4.30249877 |
| Cl | 1.65448640  | 2.97237452  | 0.49035780  |
| O  | -1.36560494 | 1.57272945  | 1.18430714  |
| C  | -1.92594421 | 0.51046102  | 0.78104799  |
| C  | -3.25065248 | 0.09377851  | 1.41653366  |
| O  | -1.38496487 | -0.21500100 | -0.07512784 |
| C  | -4.41165630 | -0.13885670 | 0.52887278  |
| O  | -3.27999698 | -0.05254742 | 2.62053064  |
| C  | -4.36678036 | 0.14419516  | -0.84515375 |
| C  | -5.59633849 | -0.62575350 | 1.10231787  |
| C  | -5.49762644 | -0.06223708 | -1.63163259 |
| H  | -3.44996593 | 0.52504579  | -1.30125779 |
| C  | -6.71937311 | -0.83643470 | 0.31231019  |
| H  | -5.61162377 | -0.83232976 | 2.17466880  |
| C  | -6.66979930 | -0.55408690 | -1.05615053 |
| H  | -5.46402715 | 0.16031344  | -2.70045243 |

|    |             |             |             |
|----|-------------|-------------|-------------|
| H  | -7.63943458 | -1.21987886 | 0.75933865  |
| H  | -7.55345893 | -0.71810501 | -1.67789549 |
| Cl | -0.78746060 | 2.25850524  | -1.95655611 |

## Int2

Charge = 0 Spin Multiplicity = 6

|    |             |             |             |
|----|-------------|-------------|-------------|
| Fe | -1.13520180 | -1.44115278 | 0.31538892  |
| N  | -2.60812362 | -0.27078716 | 1.46161319  |
| C  | -3.75913970 | -0.03302607 | 0.80545207  |
| C  | -2.45578410 | 0.16701344  | 2.69854403  |
| C  | -4.82412504 | 0.69557029  | 1.37731180  |
| C  | -3.88222039 | -0.56135709 | -0.52189677 |
| C  | -3.45925247 | 0.89710496  | 3.35668397  |
| H  | -1.50733017 | -0.06936878 | 3.18701546  |
| C  | -4.64050316 | 1.16683421  | 2.69516029  |
| C  | -6.01332933 | 0.91214379  | 0.60721743  |
| C  | -5.06684753 | -0.33862764 | -1.25570852 |
| N  | -2.84233996 | -1.26724930 | -1.01522240 |
| H  | -3.29088510 | 1.24186694  | 4.37757806  |
| H  | -5.43627130 | 1.73627987  | 3.18048547  |
| C  | -6.12837804 | 0.41697177  | -0.65756761 |
| H  | -6.82879126 | 1.48238393  | 1.05678394  |
| C  | -5.13055555 | -0.88873637 | -2.55392784 |
| C  | -2.92043255 | -1.77505510 | -2.23455384 |
| H  | -7.03762006 | 0.58468501  | -1.23849941 |
| H  | -6.02784572 | -0.74186537 | -3.15927267 |
| C  | -4.05767832 | -1.60690569 | -3.04061874 |
| H  | -2.04421544 | -2.32853879 | -2.58126725 |
| H  | -4.07513035 | -2.04535851 | -4.03902494 |
| Cl | -1.77001686 | -3.27231490 | 1.45293509  |

|    |             |             |             |
|----|-------------|-------------|-------------|
| O  | 0.25379553  | -0.68409603 | 1.50011168  |
| C  | 0.77385834  | 0.47176119  | 1.30969804  |
| C  | 0.08816228  | 1.22871128  | 0.13883793  |
| O  | 1.68778713  | 0.95945036  | 1.94957554  |
| C  | 0.37068981  | 2.62176459  | -0.21884689 |
| O  | -0.75757930 | 0.58367790  | -0.47943680 |
| C  | 1.29923192  | 3.42281176  | 0.46921950  |
| C  | -0.33593174 | 3.16143337  | -1.31135488 |
| C  | 1.51646520  | 4.73523542  | 0.06055250  |
| H  | 1.83793070  | 3.00161171  | 1.31630178  |
| C  | -0.11235393 | 4.46969284  | -1.71255224 |
| H  | -1.05484739 | 2.52917250  | -1.83510514 |
| C  | 0.81715597  | 5.25834270  | -1.02682717 |
| H  | 2.23891550  | 5.35502871  | 0.59562245  |
| H  | -0.66069250 | 4.88226448  | -2.56197952 |
| H  | 0.99457549  | 6.28879897  | -1.34385060 |
| Cl | 0.20787032  | -2.31336946 | -1.30813861 |
| C  | 2.69674950  | 0.69872196  | -1.94123021 |
| H  | 2.01146346  | 1.54725958  | -1.95699589 |
| C  | 3.52250406  | 0.56904220  | -0.88375226 |
| H  | 3.47145245  | 1.26593143  | -0.04543372 |
| C  | 2.70459400  | -0.26254896 | -3.08773238 |
| H  | 1.67001704  | -0.55191834 | -3.33703858 |
| H  | 3.11299952  | 0.22319802  | -3.99372302 |
| N  | 4.51346681  | -0.39377733 | -0.79348583 |
| C  | 4.79848409  | -1.15131186 | -2.00055860 |
| H  | 5.47029795  | -0.57440522 | -2.66518311 |
| H  | 5.32730014  | -2.07156757 | -1.71945541 |
| C  | 3.50981578  | -1.50483999 | -2.73038094 |
| H  | 3.75425533  | -2.09373095 | -3.62717435 |



|   |            |             |             |
|---|------------|-------------|-------------|
| H | 2.90145771 | -2.14603852 | -2.07281324 |
| C | 5.29914694 | -0.53566532 | 0.34685580  |
| C | 4.80941251 | -0.16961465 | 1.61699048  |
| C | 6.60776741 | -1.04986828 | 0.26197998  |
| C | 5.61090709 | -0.30370591 | 2.74681219  |
| H | 3.78515910 | 0.19144614  | 1.73060571  |
| C | 7.39088037 | -1.19208670 | 1.40497255  |
| H | 7.02892091 | -1.32162719 | -0.70662434 |
| C | 6.90592413 | -0.81715974 | 2.65744252  |
| H | 5.20245267 | -0.01751658 | 3.71982129  |
| H | 8.40360695 | -1.59186740 | 1.30648675  |
| H | 7.52481256 | -0.92784778 | 3.55045134  |

### Int3

Charge = 0 Spin Multiplicity = 6

|    |             |             |             |
|----|-------------|-------------|-------------|
| Fe | -1.39136989 | -1.39450504 | 0.91670447  |
| N  | -2.24335785 | 0.65895042  | 1.09811481  |
| C  | -3.26387189 | 0.90486814  | 0.25908602  |
| C  | -1.76113009 | 1.63241459  | 1.84497055  |
| C  | -3.85259048 | 2.18216977  | 0.13324892  |
| C  | -3.75313749 | -0.18983948 | -0.53215569 |
| C  | -2.27349628 | 2.93973832  | 1.79000347  |
| H  | -0.93546577 | 1.36990055  | 2.51104117  |
| C  | -3.31716980 | 3.21574470  | 0.93125675  |
| C  | -4.93597079 | 2.36550713  | -0.78671694 |
| C  | -4.82706036 | 0.01882308  | -1.42590607 |
| N  | -3.15480141 | -1.39050433 | -0.38904795 |
| H  | -1.83600874 | 3.71659227  | 2.41802810  |
| H  | -3.73336311 | 4.22325386  | 0.86030692  |
| C  | -5.40499298 | 1.32647469  | -1.53404288 |

|    |             |             |             |
|----|-------------|-------------|-------------|
| H  | -5.38102179 | 3.35874229  | -0.87676677 |
| C  | -5.26840319 | -1.09452247 | -2.17277302 |
| C  | -3.57854258 | -2.42101275 | -1.09970698 |
| H  | -6.23240694 | 1.47314726  | -2.23147546 |
| H  | -6.09697501 | -0.97861173 | -2.87537370 |
| C  | -4.64565855 | -2.31470346 | -2.00704918 |
| H  | -3.04043650 | -3.36047446 | -0.94397795 |
| H  | -4.96231953 | -3.19376442 | -2.56983032 |
| Cl | -2.57695949 | -1.80550709 | 2.87696259  |
| O  | 0.29763377  | -0.76134209 | 1.86040273  |
| C  | 1.17806124  | -0.27132533 | 1.08227669  |
| C  | 0.69340397  | 0.02170777  | -0.35424149 |
| O  | 2.34976193  | -0.02479771 | 1.37900385  |
| C  | 0.48037961  | 1.53559802  | -0.52699886 |
| O  | -0.45292002 | -0.66054940 | -0.61151947 |
| C  | 1.19609941  | 2.51565707  | 0.16965130  |
| C  | -0.50884060 | 1.94175632  | -1.43087065 |
| C  | 0.92968682  | 3.87071599  | -0.03822906 |
| H  | 1.95159400  | 2.22196781  | 0.90096054  |
| C  | -0.77385089 | 3.29202445  | -1.63863113 |
| H  | -1.08484684 | 1.17109727  | -1.94619996 |
| C  | -0.05372570 | 4.26462514  | -0.94224398 |
| H  | 1.49252064  | 4.62150893  | 0.52198954  |
| H  | -1.55705972 | 3.58811651  | -2.34124549 |
| H  | -0.26604304 | 5.32500722  | -1.09842977 |
| Cl | -0.85148039 | -3.62876384 | 0.48293183  |
| C  | 1.84052294  | -0.46594825 | -1.32757437 |
| H  | 1.64436292  | 0.07430593  | -2.27057591 |
| C  | 3.14748288  | 0.04397000  | -0.86908875 |
| H  | 3.27717385  | 1.12171422  | -0.74508955 |

|   |            |             |             |
|---|------------|-------------|-------------|
| C | 1.81957226 | -1.97266421 | -1.57924719 |
| H | 0.79957175 | -2.33370965 | -1.39023709 |
| H | 2.05436922 | -2.16528734 | -2.63774195 |
| N | 4.22436222 | -0.67474542 | -0.76344905 |
| C | 4.21255774 | -2.14146232 | -0.91402130 |
| H | 4.58774404 | -2.38430282 | -1.92088173 |
| H | 4.93077608 | -2.53732066 | -0.18420461 |
| C | 2.82252186 | -2.69849545 | -0.70080438 |
| H | 2.83872905 | -3.77281133 | -0.93307856 |
| H | 2.54603403 | -2.60643148 | 0.36098649  |
| C | 5.45468112 | -0.06495892 | -0.35520490 |
| C | 5.45752549 | 0.77776226  | 0.75683566  |
| C | 6.62707765 | -0.33541556 | -1.06149294 |
| C | 6.65305283 | 1.37555375  | 1.15046195  |
| H | 4.53158006 | 0.92720212  | 1.31559940  |
| C | 7.81528406 | 0.26619288  | -0.65435691 |
| H | 6.61143204 | -0.99566512 | -1.93025459 |
| C | 7.83021799 | 1.12346842  | 0.44676451  |
| H | 6.66355588 | 2.03351993  | 2.02203168  |
| H | 8.73537719 | 0.06698979  | -1.20777018 |
| H | 8.76559217 | 1.59192725  | 0.76043177  |

#### Int4

Charge = 0 Spin Multiplicity = 6

|    |             |             |             |
|----|-------------|-------------|-------------|
| Fe | -1.62507282 | -1.44953538 | 1.20459898  |
| N  | -2.31069384 | 0.63830850  | 1.22413594  |
| C  | -3.21099591 | 0.92641612  | 0.26653825  |
| C  | -1.83213800 | 1.60183878  | 1.98759084  |
| C  | -3.67054987 | 2.23867467  | 0.02847672  |
| C  | -3.69177742 | -0.15948805 | -0.53631823 |

|    |             |             |             |
|----|-------------|-------------|-------------|
| C  | -2.23029350 | 2.93998625  | 1.83211769  |
| H  | -1.10085894 | 1.30790117  | 2.74455396  |
| C  | -3.14433092 | 3.25922417  | 0.84951452  |
| C  | -4.61515200 | 2.46547628  | -1.02434636 |
| C  | -4.62646909 | 0.09035513  | -1.56288451 |
| N  | -3.21641751 | -1.39554340 | -0.27197098 |
| H  | -1.80170870 | 3.70667818  | 2.47811052  |
| H  | -3.46245729 | 4.29283889  | 0.69606370  |
| C  | -5.07361041 | 1.43332014  | -1.78835099 |
| H  | -4.96048562 | 3.48557845  | -1.20459276 |
| C  | -5.06695801 | -1.01957901 | -2.31497716 |
| C  | -3.62973704 | -2.42080799 | -0.99739101 |
| H  | -5.79290393 | 1.61341847  | -2.58996120 |
| H  | -5.79286145 | -0.87334180 | -3.11808147 |
| C  | -4.57102421 | -2.27377479 | -2.02844857 |
| H  | -3.18743267 | -3.39008158 | -0.75427290 |
| H  | -4.88637059 | -3.15128912 | -2.59397571 |
| Cl | -2.80130081 | -1.77441991 | 3.10333994  |
| O  | 0.12551019  | -0.85721148 | 1.96143963  |
| C  | 1.05677708  | -0.43357072 | 1.19795788  |
| C  | 0.63587630  | -0.06322977 | -0.23542337 |
| O  | 2.23460554  | -0.28300989 | 1.50952414  |
| C  | 0.48932542  | 1.45705148  | -0.36752434 |
| O  | -0.58359023 | -0.69427695 | -0.47516252 |
| C  | 1.16358925  | 2.36401899  | 0.45918021  |
| C  | -0.36466537 | 1.95353002  | -1.36115717 |
| C  | 0.99067071  | 3.73848852  | 0.29223296  |
| H  | 1.82174646  | 1.99993557  | 1.25015051  |
| C  | -0.53546951 | 3.32603250  | -1.52317831 |
| H  | -0.89470179 | 1.25550943  | -2.01619148 |

|    |             |             |             |
|----|-------------|-------------|-------------|
| C  | 0.14095037  | 4.22479441  | -0.69798766 |
| H  | 1.52106746  | 4.43034072  | 0.95066179  |
| H  | -1.20995588 | 3.69508385  | -2.29970428 |
| H  | 0.00109722  | 5.30094278  | -0.82405180 |
| Cl | -1.04907503 | -3.62330160 | 0.72032245  |
| C  | 1.71390942  | -0.62590916 | -1.21006688 |
| H  | 1.44452827  | -0.19098271 | -2.19274653 |
| C  | 3.02263872  | -0.04063001 | -0.86601942 |
| H  | 3.08562069  | 1.03680751  | -0.69222630 |
| C  | 1.71866798  | -2.15652115 | -1.33469368 |
| H  | 0.78007790  | -2.55787110 | -0.92947757 |
| H  | 1.72610854  | -2.41489569 | -2.40332617 |
| N  | 4.14338566  | -0.68682566 | -0.86347671 |
| C  | 4.20160082  | -2.14245986 | -1.09280979 |
| H  | 4.38438899  | -2.31387836 | -2.16538172 |
| H  | 5.06896719  | -2.51599293 | -0.53510975 |
| C  | 2.91101092  | -2.78808792 | -0.63876089 |
| H  | 2.95994688  | -3.86310976 | -0.86147588 |
| H  | 2.82580702  | -2.68311601 | 0.45397080  |
| C  | 5.35767694  | -0.01289278 | -0.50855693 |
| C  | 5.37471307  | 0.78381612  | 0.63642234  |
| C  | 6.49636439  | -0.18017126 | -1.29616808 |
| C  | 6.55161800  | 1.44446567  | 0.98185959  |
| H  | 4.47955604  | 0.85087189  | 1.25856588  |
| C  | 7.66608461  | 0.48427390  | -0.93664399 |
| H  | 6.46713384  | -0.80798596 | -2.18837820 |
| C  | 7.69473223  | 1.29811604  | 0.19685051  |
| H  | 6.57550887  | 2.06692082  | 1.87869525  |
| H  | 8.56048312  | 0.36822928  | -1.55215829 |
| H  | 8.61613980  | 1.81531278  | 0.47278303  |

|    |             |             |             |
|----|-------------|-------------|-------------|
| Cl | -1.11535502 | -1.01798435 | -3.22767829 |
| H  | -0.80844220 | -0.83216466 | -1.48811842 |

### Int5

Charge = 0 Spin Multiplicity = 6

|    |             |             |            |
|----|-------------|-------------|------------|
| Fe | -0.02867148 | 1.22146105  | 2.74821284 |
| N  | -2.07087072 | 0.60246215  | 2.27129973 |
| C  | -2.59414891 | -0.30396303 | 3.11717571 |
| C  | -2.77438027 | 1.00972141  | 1.22972585 |
| C  | -3.87945930 | -0.85734157 | 2.93815970 |
| C  | -1.78551313 | -0.71088711 | 4.22854577 |
| C  | -4.06231576 | 0.51749575  | 0.96478705 |
| H  | -2.30085958 | 1.74945302  | 0.58017598 |
| C  | -4.61332777 | -0.41923467 | 1.81520037 |
| C  | -4.35898067 | -1.82406366 | 3.88077556 |
| C  | -2.28584772 | -1.65765432 | 5.14768273 |
| N  | -0.55651974 | -0.16305971 | 4.34380299 |
| H  | -4.60389336 | 0.87544509  | 0.08866997 |
| H  | -5.60950039 | -0.82673933 | 1.62939296 |
| C  | -3.59433125 | -2.20663296 | 4.94265479 |
| H  | -5.35392365 | -2.24826932 | 3.73136745 |
| C  | -1.44729644 | -2.00920599 | 6.22733847 |
| C  | 0.21497443  | -0.50517197 | 5.36273521 |
| H  | -3.96718773 | -2.94153174 | 5.65889061 |
| H  | -1.79280362 | -2.73675692 | 6.96533664 |
| C  | -0.20032891 | -1.42850805 | 6.33573043 |
| H  | 1.20199595  | -0.03707982 | 5.39713427 |
| H  | 0.47129284  | -1.67721893 | 7.15822314 |
| Cl | -0.75085588 | 3.09595044  | 3.74180493 |
| O  | 0.15451055  | 1.73381567  | 0.88712802 |

|    |             |             |             |
|----|-------------|-------------|-------------|
| C  | 0.38737817  | 0.92566472  | -0.09478242 |
| C  | 0.47918067  | -0.58343879 | 0.29144096  |
| O  | 0.51336702  | 1.27333184  | -1.25178137 |
| C  | -0.75440341 | -1.30863467 | -0.23719115 |
| O  | 0.44668744  | -0.67712498 | 1.73270027  |
| C  | -1.17073387 | -1.14424290 | -1.56366920 |
| C  | -1.46908009 | -2.17789025 | 0.59283488  |
| C  | -2.29341772 | -1.81908663 | -2.03901467 |
| H  | -0.61280286 | -0.46970725 | -2.21424251 |
| C  | -2.59391857 | -2.84965702 | 0.11611997  |
| H  | -1.14116426 | -2.32192648 | 1.62230479  |
| C  | -3.01349553 | -2.67054899 | -1.20066566 |
| H  | -2.60889877 | -1.67507756 | -3.07528501 |
| H  | -3.14612865 | -3.51512542 | 0.78427672  |
| H  | -3.89706415 | -3.19372892 | -1.57393532 |
| Cl | 2.22737808  | 1.17489480  | 3.32660065  |
| C  | 1.77313179  | -1.19146977 | -0.19649678 |
| C  | 2.90743498  | -0.46124984 | -0.07617860 |
| H  | 2.86945163  | 0.55747172  | 0.31625548  |
| C  | 1.81743216  | -2.61062177 | -0.68280122 |
| H  | 1.15180927  | -3.24241440 | -0.07262457 |
| H  | 1.41869296  | -2.67434040 | -1.71138889 |
| N  | 4.15759902  | -0.88779895 | -0.44634553 |
| C  | 4.24461792  | -2.14301773 | -1.17534714 |
| H  | 4.06377660  | -1.97187572 | -2.25262279 |
| H  | 5.26375094  | -2.53745375 | -1.07057948 |
| C  | 3.24121717  | -3.14593680 | -0.62427993 |
| H  | 3.32948182  | -4.08740513 | -1.18556862 |
| H  | 3.50923396  | -3.36566754 | 0.42242221  |
| C  | 5.29465699  | -0.11891382 | -0.18369149 |

|   |            |             |             |
|---|------------|-------------|-------------|
| C | 5.32729812 | 0.77250926  | 0.90505576  |
| C | 6.43321731 | -0.22088390 | -1.00200180 |
| C | 6.45779243 | 1.54738265  | 1.14623702  |
| H | 4.47597355 | 0.84268068  | 1.58575205  |
| C | 7.56342393 | 0.54925833  | -0.73820853 |
| H | 6.43083229 | -0.88864107 | -1.86453852 |
| C | 7.58611400 | 1.44336398  | 0.33162781  |
| H | 6.45881393 | 2.23012606  | 1.99981012  |
| H | 8.43427363 | 0.45443624  | -1.39181079 |
| H | 8.47316754 | 2.04819569  | 0.53130036  |
| H | 1.35898756 | -0.83691476 | 2.02795566  |

### Int6'

Charge = 0 Spin Multiplicity = 6

|    |            |             |            |
|----|------------|-------------|------------|
| Fe | 0.90274510 | -1.08175578 | 3.93812654 |
| N  | 2.27011617 | -2.81909696 | 4.01961051 |
| C  | 2.56219296 | -3.23265359 | 5.26712190 |
| C  | 2.77969327 | -3.45656563 | 2.98287719 |
| C  | 3.40003781 | -4.34060959 | 5.52284910 |
| C  | 1.99278070 | -2.50123702 | 6.36349017 |
| C  | 3.62433104 | -4.56955553 | 3.13407030 |
| H  | 2.52736609 | -3.06459099 | 1.99569432 |
| C  | 3.93380337 | -5.01395693 | 4.40310893 |
| C  | 3.66467671 | -4.72004419 | 6.87954082 |
| C  | 2.27148114 | -2.89646220 | 7.69044536 |
| N  | 1.20363733 | -1.44741565 | 6.07450758 |
| H  | 4.02335935 | -5.06486383 | 2.24783533 |
| H  | 4.58723577 | -5.87662115 | 4.55237770 |
| C  | 3.12257421 | -4.02688253 | 7.92018907 |
| H  | 4.31313582 | -5.57935459 | 7.06295738 |



|    |             |             |             |
|----|-------------|-------------|-------------|
| C  | 1.68351455  | -2.13734509 | 8.72491171  |
| C  | 0.66148512  | -0.74660899 | 7.05423259  |
| H  | 3.32938189  | -4.32153230 | 8.95118623  |
| H  | 1.87104173  | -2.40779073 | 9.76664352  |
| C  | 0.87913661  | -1.06271582 | 8.40543963  |
| H  | 0.03184795  | 0.09344206  | 6.74806626  |
| H  | 0.41026785  | -0.45579401 | 9.18106586  |
| Cl | -0.78328680 | -2.70505701 | 4.05623976  |
| O  | 0.78502354  | -1.12804226 | 1.92718439  |
| C  | 1.53711876  | -0.75195744 | 0.97960536  |
| C  | 0.81381286  | -0.00267263 | -0.15130829 |
| O  | 2.75202228  | -0.92589462 | 0.87079121  |
| C  | 0.83174603  | 1.49943531  | 0.13577147  |
| O  | -0.50128506 | -0.45947619 | -0.26101410 |
| C  | 1.58953994  | 2.07323984  | 1.16035198  |
| C  | 0.02735919  | 2.32389854  | -0.66160415 |
| C  | 1.55223507  | 3.45328939  | 1.37209285  |
| H  | 2.19495837  | 1.45344103  | 1.82819814  |
| C  | -0.00391097 | 3.69914863  | -0.45253788 |
| H  | -0.59123596 | 1.87573192  | -1.44311986 |
| C  | 0.76317887  | 4.26957906  | 0.56601774  |
| H  | 2.14210797  | 3.88632002  | 2.18360476  |
| H  | -0.63438943 | 4.33014479  | -1.08368347 |
| H  | 0.73714818  | 5.34893618  | 0.73384004  |
| Cl | -0.47162090 | 0.74069817  | 4.26324738  |
| C  | 1.58889800  | -0.32417558 | -1.45826210 |
| H  | 1.27858757  | 0.44013910  | -2.19400122 |
| C  | 3.02176217  | -0.03422024 | -1.21036593 |
| H  | 3.28187455  | 0.90951161  | -0.72475752 |
| C  | 1.32392033  | -1.72335155 | -2.03451144 |

|    |             |             |             |
|----|-------------|-------------|-------------|
| H  | 0.44065475  | -2.14186270 | -1.53450788 |
| H  | 1.06124111  | -1.62295644 | -3.09794318 |
| N  | 4.00694482  | -0.71066071 | -1.71785077 |
| C  | 3.77596321  | -1.98027074 | -2.42946448 |
| H  | 3.69620792  | -1.76832340 | -3.50766864 |
| H  | 4.66552661  | -2.60203761 | -2.27098881 |
| C  | 2.52331420  | -2.64705612 | -1.90119698 |
| H  | 2.35641046  | -3.57627533 | -2.46382838 |
| H  | 2.68834216  | -2.92415454 | -0.84881761 |
| C  | 5.35690745  | -0.32112660 | -1.44345487 |
| C  | 5.70933543  | 0.04553716  | -0.14299363 |
| C  | 6.29941007  | -0.33276145 | -2.47225373 |
| C  | 7.02306969  | 0.42945377  | 0.11838701  |
| H  | 4.96536307  | -0.00273601 | 0.65524766  |
| C  | 7.60933237  | 0.04920124  | -2.19447896 |
| H  | 6.01080687  | -0.62256314 | -3.48419028 |
| C  | 7.97216381  | 0.43427789  | -0.90314194 |
| H  | 7.30653710  | 0.71402686  | 1.13391119  |
| H  | 8.34998435  | 0.05123413  | -2.99691216 |
| H  | 9.00119980  | 0.73281200  | -0.69182199 |
| Cl | 2.90650766  | 0.16830945  | 4.00089433  |
| H  | -0.73181688 | -0.75386579 | 0.63717164  |

### Int6

Charge = 0 Spin Multiplicity = 6

|    |            |             |             |
|----|------------|-------------|-------------|
| Fe | 0.64293829 | -0.95793274 | -0.57799131 |
| N  | 2.56760349 | 0.11149253  | -0.63193197 |
| C  | 3.54037675 | -0.45069720 | 0.11080103  |
| C  | 2.80214586 | 1.23876538  | -1.27572242 |
| C  | 4.81917140 | 0.13454692  | 0.24670232  |

|    |             |             |             |
|----|-------------|-------------|-------------|
| C  | 3.25358087  | -1.69889541 | 0.76535758  |
| C  | 4.04149357  | 1.89672394  | -1.20475776 |
| H  | 1.97790431  | 1.63851104  | -1.87026912 |
| C  | 5.04818489  | 1.34820222  | -0.43756682 |
| C  | 5.80825752  | -0.52094443 | 1.05111399  |
| C  | 4.25295454  | -2.32756621 | 1.54190333  |
| N  | 2.02912597  | -2.23267322 | 0.59756328  |
| H  | 4.18526781  | 2.83115944  | -1.74821441 |
| H  | 6.02185601  | 1.83715142  | -0.35638628 |
| C  | 5.53648992  | -1.70277409 | 1.67300845  |
| H  | 6.79028468  | -0.05391761 | 1.15161557  |
| C  | 3.91764792  | -3.55729227 | 2.14847986  |
| C  | 1.73154687  | -3.38359931 | 1.16915896  |
| H  | 6.29676951  | -2.19797162 | 2.28089545  |
| H  | 4.65979739  | -4.07777285 | 2.75823063  |
| C  | 2.65709047  | -4.08618526 | 1.96009382  |
| H  | 0.71800233  | -3.75730214 | 0.99572780  |
| H  | 2.36772956  | -5.03508350 | 2.41392980  |
| Cl | 1.46485014  | -2.21132211 | -2.41530757 |
| O  | -0.17360266 | 0.38118441  | -1.85134255 |
| C  | -1.00265801 | 1.33957550  | -1.71452987 |
| C  | -1.03635381 | 2.00349217  | -0.35142136 |
| O  | -1.71986456 | 1.80601145  | -2.58928875 |
| C  | 0.06523671  | 2.95938768  | -0.14107831 |
| O  | 0.32516653  | -0.06041661 | 1.05624591  |
| C  | 0.29616662  | 3.94462036  | -1.11530986 |
| C  | 0.92379034  | 2.87024253  | 0.96541369  |
| C  | 1.34405873  | 4.84911917  | -0.96292904 |
| H  | -0.35975118 | 3.99912307  | -1.98709672 |
| C  | 1.97771688  | 3.76862341  | 1.10163180  |

|    |             |             |             |
|----|-------------|-------------|-------------|
| H  | 0.79564887  | 2.02985407  | 1.64964863  |
| C  | 2.18596878  | 4.76458131  | 0.14630581  |
| H  | 1.50728229  | 5.61966147  | -1.71978698 |
| H  | 2.65511692  | 3.67878396  | 1.95414471  |
| H  | 3.01507044  | 5.46716240  | 0.25856309  |
| Cl | -1.27734887 | -2.31629946 | -0.20289409 |
| C  | -2.06214912 | 1.79326857  | 0.53310436  |
| C  | -3.07862389 | 0.88032577  | 0.14174224  |
| H  | -2.99843846 | 0.35271086  | -0.81079798 |
| C  | -2.21365003 | 2.49990987  | 1.85342509  |
| H  | -1.23366509 | 2.67894353  | 2.30944944  |
| H  | -2.66471839 | 3.49239593  | 1.67994279  |
| N  | -4.16394376 | 0.63888095  | 0.83913091  |
| C  | -4.40215255 | 1.32084512  | 2.12061498  |
| H  | -5.00841542 | 2.21996200  | 1.92619630  |
| H  | -4.99627776 | 0.64078532  | 2.74362385  |
| C  | -3.09230001 | 1.68428600  | 2.78692370  |
| H  | -3.31270333 | 2.24379429  | 3.70631272  |
| H  | -2.56991069 | 0.76065893  | 3.08526532  |
| C  | -5.15373826 | -0.27630537 | 0.36809011  |
| C  | -4.76245954 | -1.46421698 | -0.25392402 |
| C  | -6.50689873 | 0.02778748  | 0.54223823  |
| C  | -5.73839645 | -2.33973823 | -0.72314411 |
| H  | -3.70191920 | -1.71919687 | -0.34014263 |
| C  | -7.47069637 | -0.85963778 | 0.07113169  |
| H  | -6.81235962 | 0.95877819  | 1.02156233  |
| C  | -7.09144607 | -2.04198220 | -0.56454816 |
| H  | -5.43209006 | -3.27149975 | -1.20355095 |
| H  | -8.52807873 | -0.61819159 | 0.19815324  |
| H  | -7.85217869 | -2.73487496 | -0.93033980 |

H -0.45934787 -0.47145792 1.44266405

### Int7'

Charge = 0 Spin Multiplicity = 1

O -1.69317570 -1.32443912 2.44630042

C -1.17703771 -0.94857215 1.42671772

C -1.83175148 -0.97798663 0.04921426

O 0.04901500 -0.45740815 1.34094076

C -2.60697167 0.31969020 -0.18313117

O -2.65802525 -2.09376170 -0.06184026

C -2.27793675 1.52577385 0.44452424

C -3.67293506 0.29497983 -1.08923167

C -2.99566093 2.68869523 0.16165564

H -1.46483011 1.57270433 1.17344476

C -4.38738505 1.45635467 -1.37210638

H -3.94198511 -0.65123365 -1.56230422

C -4.04933605 2.65887881 -0.74934562

H -2.72939711 3.62153541 0.66407018

H -5.21710971 1.42156623 -2.08235463

H -4.61147916 3.56944404 -0.96929625

C -0.60236145 -1.05091662 -0.88831335

H -0.81378274 -0.49638602 -1.81174072

C 0.44401197 -0.26501422 -0.08049093

H 0.33400322 0.81035573 -0.26642788

C -0.15089037 -2.47331370 -1.23051894

H -1.01872934 -3.14385629 -1.18846602

H 0.21774455 -2.48506531 -2.26810810

N 1.78365651 -0.62449288 -0.26946984

C 2.15856110 -2.02488136 -0.43981363

H 2.61425405 -2.17196228 -1.43560131

|   |             |             |             |
|---|-------------|-------------|-------------|
| H | 2.92840464  | -2.28301395 | 0.30632214  |
| C | 0.96207001  | -2.94739734 | -0.31379744 |
| H | 1.27822703  | -3.96554176 | -0.58366861 |
| H | 0.62012353  | -2.99401011 | 0.73291870  |
| C | 2.79247071  | 0.31423633  | -0.03970315 |
| C | 2.54216068  | 1.52685195  | 0.63121918  |
| C | 4.10662066  | 0.05968635  | -0.47510038 |
| C | 3.55990979  | 2.45792086  | 0.81908445  |
| H | 1.55542038  | 1.73803945  | 1.04431200  |
| C | 5.11729073  | 0.99592264  | -0.27131980 |
| H | 4.34274168  | -0.86888866 | -0.99467259 |
| C | 4.85575814  | 2.20600158  | 0.36952878  |
| H | 3.33334833  | 3.38889658  | 1.34498305  |
| H | 6.12579723  | 0.77145211  | -0.62803182 |
| H | 5.65152022  | 2.93713703  | 0.52631151  |
| H | -3.11254803 | -2.18458509 | 0.78938004  |

### Int7

Charge = 0 Spin Multiplicity = 6

|    |             |             |             |
|----|-------------|-------------|-------------|
| Fe | -0.78617962 | -0.80580535 | 1.46382627  |
| N  | -2.42364004 | 0.08329204  | 0.34524491  |
| C  | -3.09793223 | -0.76217855 | -0.45569488 |
| C  | -2.78052281 | 1.35141194  | 0.41013371  |
| C  | -4.18403984 | -0.34639838 | -1.25328311 |
| C  | -2.68995476 | -2.13646107 | -0.46120574 |
| C  | -3.85412655 | 1.85975354  | -0.33920640 |
| H  | -2.19546570 | 1.98528196  | 1.07929039  |
| C  | -4.55112580 | 1.01442998  | -1.17648484 |
| C  | -4.85319155 | -1.30947972 | -2.07628763 |
| C  | -3.37667965 | -3.06821484 | -1.26978906 |

|    |             |             |             |
|----|-------------|-------------|-------------|
| N  | -1.65533964 | -2.48796871 | 0.33128862  |
| H  | -4.11192707 | 2.91608657  | -0.25477661 |
| H  | -5.38648381 | 1.38261754  | -1.77648682 |
| C  | -4.46545447 | -2.61658687 | -2.08497322 |
| H  | -5.68776645 | -0.97507531 | -2.69606825 |
| C  | -2.94072806 | -4.40953969 | -1.21589200 |
| C  | -1.26373169 | -3.75014132 | 0.37258698  |
| H  | -4.98372620 | -3.34583365 | -2.71101124 |
| H  | -3.44281614 | -5.16483851 | -1.82480818 |
| C  | -1.88772591 | -4.74987188 | -0.39151551 |
| H  | -0.41888997 | -3.96920712 | 1.03117960  |
| H  | -1.52924379 | -5.77779432 | -0.32507507 |
| Cl | -2.24238126 | -1.19043788 | 3.16826981  |
| O  | -0.18399751 | 0.97415804  | 1.95636963  |
| C  | 0.92086347  | 1.63160299  | 1.86372939  |
| C  | 1.02004024  | 2.46976236  | 0.60293786  |
| O  | 1.81075151  | 1.66146896  | 2.69224633  |
| C  | 0.08034392  | 3.60137638  | 0.56084036  |
| O  | 0.28741067  | -0.56588295 | -0.37826075 |
| C  | -0.01943615 | 4.44846580  | 1.67691645  |
| C  | -0.77010887 | 3.80496627  | -0.53845151 |
| C  | -0.92159284 | 5.50817971  | 1.67577967  |
| H  | 0.62743612  | 4.27987301  | 2.54148698  |
| C  | -1.68135296 | 4.85801240  | -0.52328692 |
| H  | -0.75743353 | 3.08852396  | -1.36856202 |
| C  | -1.75334434 | 5.71664447  | 0.57452487  |
| H  | -0.98034139 | 6.17072723  | 2.54216415  |
| H  | -2.35101469 | 5.00158394  | -1.37479080 |
| H  | -2.46770945 | 6.54328184  | 0.57783940  |
| Cl | 1.00825487  | -2.07979187 | 2.18002445  |

|    |             |             |             |
|----|-------------|-------------|-------------|
| C  | 1.91102953  | 2.16191055  | -0.38789207 |
| C  | 2.69744063  | 0.98153924  | -0.20907206 |
| H  | 2.61922339  | 0.41721108  | 0.72111092  |
| C  | 2.16027851  | 2.96756537  | -1.63278749 |
| H  | 1.27372434  | 3.54292296  | -1.91515266 |
| H  | 2.96049146  | 3.69821689  | -1.41758501 |
| N  | 3.55231901  | 0.52249725  | -1.08593840 |
| C  | 3.77735306  | 1.21046414  | -2.36903883 |
| H  | 4.67999787  | 1.83300825  | -2.26268917 |
| H  | 3.98976891  | 0.43445052  | -3.11534470 |
| C  | 2.57856709  | 2.04362807  | -2.76376674 |
| H  | 2.84214252  | 2.61798875  | -3.66285671 |
| H  | 1.72486655  | 1.39227772  | -3.01500875 |
| C  | 3.70202662  | -1.71005793 | -0.09697216 |
| C  | 5.59263830  | -0.80143329 | -1.31727429 |
| C  | 4.43251071  | -2.86554766 | 0.16187558  |
| H  | 2.67695565  | -1.63191963 | 0.27069656  |
| C  | 6.30990357  | -1.96590299 | -1.05521753 |
| H  | 6.06003130  | 0.00632987  | -1.88089838 |
| C  | 5.73590778  | -2.99951487 | -0.31544744 |
| H  | 3.96492094  | -3.66885575 | 0.73532391  |
| H  | 7.33117471  | -2.05946868 | -1.43020409 |
| H  | 6.30379850  | -3.91044073 | -0.11491215 |
| H  | 0.49796507  | -1.41261395 | -0.79272297 |
| H  | -0.11933867 | -0.00036879 | -1.13072930 |
| Cl | -0.83031704 | 0.90062471  | -2.60732305 |
| C  | 4.28922072  | -0.67487312 | -0.82873474 |

### Int8'

Charge = 0 Spin Multiplicity = 1



|   |             |             |             |
|---|-------------|-------------|-------------|
| O | -1.70451601 | -1.22215751 | 2.64257346  |
| C | -1.19901225 | -0.88920183 | 1.60398423  |
| C | -1.89959435 | -0.87969767 | 0.24791769  |
| O | 0.05078360  | -0.48166577 | 1.46228403  |
| C | -2.55430614 | 0.47612890  | -0.00291967 |
| O | -2.84039127 | -1.91939930 | 0.20412832  |
| C | -2.27643116 | 1.60355508  | 0.77573066  |
| C | -3.45377594 | 0.59211212  | -1.07045875 |
| C | -2.88312464 | 2.82769799  | 0.49028153  |
| H | -1.58455909 | 1.54336050  | 1.61964253  |
| C | -4.06007944 | 1.81278960  | -1.35211907 |
| H | -3.68385652 | -0.28108882 | -1.68481661 |
| C | -3.77556518 | 2.93582722  | -0.57309292 |
| H | -2.65635236 | 3.69856936  | 1.10937548  |
| H | -4.76050091 | 1.88765010  | -2.18719687 |
| H | -4.25201004 | 3.89346182  | -0.79512602 |
| C | -0.71114182 | -1.10835587 | -0.70921547 |
| H | -0.91496261 | -0.62635818 | -1.67429925 |
| C | 0.37710813  | -0.30427859 | 0.01586552  |
| H | 0.24472694  | 0.76783515  | -0.17750666 |
| C | -0.32658912 | -2.58036749 | -0.92568976 |
| H | -1.17507265 | -3.22909578 | -0.67497208 |
| H | -0.12837056 | -2.72992201 | -1.99771967 |
| N | 1.70251506  | -0.65802894 | -0.24323107 |
| C | 2.06470580  | -2.05383964 | -0.46115943 |
| H | 2.37132907  | -2.20992243 | -1.51180938 |
| H | 2.93666334  | -2.29519384 | 0.16771491  |
| C | 0.90937575  | -2.97959502 | -0.13751433 |
| H | 1.20250384  | -4.00881272 | -0.39045370 |
| H | 0.70971573  | -2.96568639 | 0.94571845  |

|    |             |             |             |
|----|-------------|-------------|-------------|
| C  | 2.71482835  | 0.29504303  | -0.10809815 |
| C  | 2.50375552  | 1.50602535  | 0.57837888  |
| C  | 3.98750995  | 0.05765703  | -0.65895956 |
| C  | 3.51999315  | 2.45254774  | 0.67423531  |
| H  | 1.55210955  | 1.70271487  | 1.07379191  |
| C  | 4.99832568  | 1.00902969  | -0.54531055 |
| H  | 4.18834175  | -0.86807905 | -1.19847122 |
| C  | 4.77533384  | 2.21692409  | 0.11404028  |
| H  | 3.32671982  | 3.38255125  | 1.21487103  |
| H  | 5.97477810  | 0.79919488  | -0.98932772 |
| H  | 5.57080977  | 2.96015187  | 0.19894042  |
| H  | -3.42069923 | -2.54862369 | -1.24196636 |
| H  | -3.32178885 | -1.93083664 | 1.04662569  |
| Cl | -3.70424805 | -2.96703881 | -2.46452359 |

### Int8

Charge = 1 Spin Multiplicity = 6

|    |             |             |             |
|----|-------------|-------------|-------------|
| Fe | -0.39962972 | -1.26809335 | 0.72971514  |
| N  | -2.22765680 | -0.16133765 | 1.14436192  |
| C  | -3.20047274 | -0.31266421 | 0.22647811  |
| C  | -2.43811896 | 0.60410298  | 2.20331625  |
| C  | -4.44903455 | 0.33419474  | 0.32423973  |
| C  | -2.91885368 | -1.17161970 | -0.88236481 |
| C  | -3.65445848 | 1.27688906  | 2.39792107  |
| H  | -1.61222428 | 0.69606662  | 2.91230271  |
| C  | -4.65723170 | 1.14883534  | 1.45730599  |
| C  | -5.41469226 | 0.13724091  | -0.71569264 |
| C  | -3.89042883 | -1.35995657 | -1.88572722 |
| N  | -1.70666460 | -1.76757257 | -0.91558239 |
| H  | -3.78588592 | 1.89801028  | 3.28446616  |

|    |             |             |             |
|----|-------------|-------------|-------------|
| H  | -5.60836222 | 1.67182049  | 1.57887239  |
| C  | -5.14512220 | -0.67483115 | -1.77737415 |
| H  | -6.37447890 | 0.65182028  | -0.63954612 |
| C  | -3.55179385 | -2.22292134 | -2.94997079 |
| C  | -1.40696351 | -2.57393717 | -1.92310319 |
| H  | -5.88594586 | -0.82137751 | -2.56575364 |
| H  | -4.27147755 | -2.40073780 | -3.75212948 |
| C  | -2.31305287 | -2.83165406 | -2.96330457 |
| H  | -0.40890650 | -3.01723077 | -1.90977137 |
| H  | -2.02113514 | -3.50467207 | -3.77009673 |
| Cl | -0.76228327 | -2.89513020 | 2.16489058  |
| O  | 0.44346630  | 0.18880887  | 1.68661116  |
| C  | 0.69593668  | 1.42541788  | 1.41266234  |
| C  | 0.86552311  | 1.73640022  | -0.05948925 |
| O  | 0.76757577  | 2.32274321  | 2.22721282  |
| C  | -0.39559607 | 2.08684818  | -0.72938736 |
| C  | -1.31083722 | 2.96288576  | -0.12029710 |
| C  | -0.76451035 | 1.43357428  | -1.91895516 |
| C  | -2.54843569 | 3.20244644  | -0.70784092 |
| H  | -1.03830941 | 3.45494288  | 0.81534654  |
| C  | -2.01150115 | 1.66394700  | -2.49150827 |
| H  | -0.09070750 | 0.69694279  | -2.36085939 |
| C  | -2.90307560 | 2.55370772  | -1.89234876 |
| H  | -3.24806727 | 3.89179050  | -0.23061424 |
| H  | -2.29308040 | 1.13298993  | -3.40337841 |
| H  | -3.88273937 | 2.73113385  | -2.34122688 |
| Cl | 1.43821553  | -1.77489833 | -0.53491408 |
| C  | 2.08079536  | 1.60776772  | -0.67216040 |
| C  | 3.11108718  | 0.96382572  | 0.08076119  |
| H  | 2.92995137  | 0.66962057  | 1.11699077  |

|   |            |             |             |
|---|------------|-------------|-------------|
| C | 2.42548587 | 2.04158049  | -2.06946609 |
| H | 1.53385834 | 2.11658296  | -2.70023588 |
| H | 2.85394081 | 3.05774329  | -2.01413537 |
| N | 4.28607897 | 0.65194165  | -0.39584126 |
| C | 4.66983467 | 0.99008191  | -1.77765417 |
| H | 5.22271293 | 1.94227263  | -1.75450653 |
| H | 5.35806038 | 0.20719384  | -2.11927003 |
| C | 3.44795618 | 1.08760420  | -2.66712910 |
| H | 3.76926819 | 1.42774457  | -3.66089062 |
| H | 3.00366529 | 0.08627557  | -2.78556135 |
| C | 4.76009611 | -1.16954978 | 1.15749290  |
| C | 6.56344826 | 0.27521007  | 0.39858096  |
| C | 5.66713992 | -1.87783628 | 1.94138156  |
| H | 3.71271293 | -1.47592985 | 1.10063635  |
| C | 7.45857378 | -0.44441765 | 1.18498072  |
| H | 6.91100856 | 1.12370448  | -0.19257935 |
| C | 7.01393428 | -1.51684705 | 1.95902809  |
| H | 5.31703323 | -2.72850549 | 2.52962493  |
| H | 8.51224351 | -0.15831865 | 1.19589725  |
| H | 7.72231055 | -2.07802417 | 2.57197720  |
| C | 5.21480835 | -0.08705449 | 0.40066627  |

### Int9'

Charge = 1 Spin Multiplicity = 1

|   |             |            |            |
|---|-------------|------------|------------|
| O | -0.95745679 | 0.88976343 | 3.00426501 |
| C | -0.59810086 | 0.58439821 | 1.90061534 |
| C | -1.45777456 | 0.23344940 | 0.70269485 |
| O | 0.66754531  | 0.47809073 | 1.52944223 |
| C | -2.81797477 | 0.49348756 | 0.58199195 |
| C | -3.54571294 | 1.12144382 | 1.64642568 |

|   |             |             |             |
|---|-------------|-------------|-------------|
| C | -3.51648362 | 0.11556506  | -0.61229055 |
| C | -4.89972027 | 1.34012035  | 1.51679290  |
| H | -3.01133183 | 1.40628888  | 2.55198472  |
| C | -4.86803753 | 0.34012330  | -0.72104089 |
| H | -2.97644741 | -0.35101324 | -1.43674272 |
| C | -5.55768351 | 0.95200467  | 0.34102075  |
| H | -5.45942436 | 1.81509582  | 2.32350976  |
| H | -5.40445160 | 0.05207090  | -1.62590399 |
| H | -6.63114185 | 1.13258461  | 0.24462595  |
| C | -0.58136836 | -0.42623392 | -0.27473307 |
| H | -0.82928685 | -0.14238997 | -1.30561697 |
| C | 0.81509217  | 0.10344131  | 0.10461420  |
| H | 1.00226580  | 1.04723787  | -0.42184067 |
| C | -0.67875134 | -1.98288956 | -0.14498095 |
| H | -1.68013260 | -2.26690655 | 0.20597886  |
| H | -0.56577563 | -2.38814606 | -1.16130967 |
| N | 1.89201271  | -0.75554307 | -0.08608464 |
| C | 1.77462569  | -2.18310705 | 0.19871494  |
| H | 1.94254488  | -2.76056296 | -0.72640081 |
| H | 2.56466015  | -2.47269665 | 0.90996769  |
| C | 0.40862783  | -2.53308867 | 0.75292203  |
| H | 0.32085800  | -3.62796724 | 0.80318028  |
| H | 0.30120525  | -2.16616886 | 1.78577181  |
| C | 3.16025987  | -0.22446809 | -0.35873297 |
| C | 3.46042370  | 1.12787242  | -0.11341258 |
| C | 4.17259355  | -1.05071619 | -0.87722957 |
| C | 4.71874082  | 1.63873184  | -0.41901637 |
| H | 2.72556650  | 1.78470459  | 0.35371871  |
| C | 5.43006057  | -0.52875936 | -1.16780970 |
| H | 3.97801737  | -2.10493593 | -1.07322167 |

|   |            |             |             |
|---|------------|-------------|-------------|
| C | 5.71346646 | 0.81906285  | -0.95063997 |
| H | 4.92544046 | 2.69252491  | -0.21723059 |
| H | 6.19677394 | -1.19112809 | -1.57700291 |
| H | 6.70115471 | 1.22324732  | -1.18153238 |

### Int9

Charge = 0 Spin Multiplicity = 6

|    |             |             |             |
|----|-------------|-------------|-------------|
| Fe | -0.63379630 | -0.69672931 | 1.24715509  |
| N  | -2.45211175 | 0.18266939  | 0.40009138  |
| C  | -3.24194621 | -0.68835324 | -0.25532505 |
| C  | -2.80974863 | 1.44785854  | 0.50460947  |
| C  | -4.45476599 | -0.29927523 | -0.86367658 |
| C  | -2.81717339 | -2.05823953 | -0.31548607 |
| C  | -3.99990396 | 1.93160717  | -0.06580606 |
| H  | -2.12911782 | 2.09841394  | 1.05881076  |
| C  | -4.82022576 | 1.06050660  | -0.75311709 |
| C  | -5.24029077 | -1.28489384 | -1.54660772 |
| C  | -3.61223225 | -3.00887762 | -0.99219686 |
| N  | -1.65865393 | -2.38468445 | 0.29078448  |
| H  | -4.25347752 | 2.98718887  | 0.03960849  |
| H  | -5.75026581 | 1.40784599  | -1.20899267 |
| C  | -4.83524075 | -2.58513538 | -1.60887333 |
| H  | -6.17496037 | -0.97206443 | -2.01682963 |
| C  | -3.14145331 | -4.33952446 | -1.01600972 |
| C  | -1.23222632 | -3.63347983 | 0.26061026  |
| H  | -5.44027464 | -3.33007194 | -2.12988405 |
| H  | -3.72288602 | -5.10903686 | -1.52911200 |
| C  | -1.95201008 | -4.65040259 | -0.38900172 |
| H  | -0.28445926 | -3.82953505 | 0.76980340  |
| H  | -1.56175937 | -5.66900314 | -0.38893052 |

|    |             |             |             |
|----|-------------|-------------|-------------|
| Cl | -1.99146647 | -1.14367659 | 3.09444173  |
| O  | -0.07357988 | 1.07024309  | 1.87436161  |
| C  | 1.03219897  | 1.72316507  | 1.82626479  |
| C  | 1.21330857  | 2.52921209  | 0.55477188  |
| O  | 1.87710348  | 1.78061785  | 2.70129081  |
| C  | 0.18960586  | 3.56481080  | 0.34760997  |
| C  | -0.13071223 | 4.46308674  | 1.37651654  |
| C  | -0.56034636 | 3.58505506  | -0.83915296 |
| C  | -1.15491357 | 5.39024148  | 1.20450304  |
| H  | 0.43432808  | 4.43572094  | 2.31149337  |
| C  | -1.59176545 | 4.50554269  | -1.00117984 |
| H  | -0.36312706 | 2.83569507  | -1.60865136 |
| C  | -1.88600494 | 5.41485468  | 0.01564325  |
| H  | -1.38879028 | 6.09370679  | 2.00661010  |
| H  | -2.17939981 | 4.50234144  | -1.92193440 |
| H  | -2.69535888 | 6.13705657  | -0.11356536 |
| Cl | 1.19257178  | -1.93152510 | 1.96858536  |
| C  | 2.21217993  | 2.25042759  | -0.33310993 |
| C  | 2.93903197  | 1.03218899  | -0.13759809 |
| H  | 2.72965900  | 0.39849560  | 0.72820263  |
| C  | 2.57034719  | 3.08066675  | -1.53526280 |
| H  | 1.72127144  | 3.68786706  | -1.86665500 |
| H  | 3.36250373  | 3.79046849  | -1.23768258 |
| N  | 3.85190519  | 0.58831012  | -0.96133388 |
| C  | 4.23424458  | 1.33944301  | -2.16864678 |
| H  | 5.11107517  | 1.96038960  | -1.92569362 |
| H  | 4.54051248  | 0.60221087  | -2.92099568 |
| C  | 3.07964505  | 2.18883584  | -2.65496366 |
| H  | 3.42072965  | 2.78592184  | -3.51163757 |
| H  | 2.26983817  | 1.53000855  | -3.00763734 |

|    |            |             |             |
|----|------------|-------------|-------------|
| C  | 4.45765570 | -0.68965393 | -0.75203478 |
| C  | 3.65276376 | -1.77471689 | -0.40457999 |
| C  | 5.83771273 | -0.83399930 | -0.91444702 |
| C  | 4.24793893 | -3.01494951 | -0.18624929 |
| H  | 2.57064426 | -1.64988260 | -0.31555105 |
| C  | 6.41597712 | -2.08214815 | -0.70190405 |
| H  | 6.45923547 | 0.02177923  | -1.18303948 |
| C  | 5.62509734 | -3.17244041 | -0.33424590 |
| H  | 3.62060424 | -3.86337483 | 0.09545384  |
| H  | 7.49551383 | -2.20008833 | -0.81653126 |
| H  | 6.08613971 | -4.14827752 | -0.16665629 |
| Cl | 0.25297757 | -0.37869908 | -0.97949947 |

### **Fe(phen)Cl<sub>3</sub>**

Charge = 0 Spin Multiplicity = 6

|    |             |             |             |
|----|-------------|-------------|-------------|
| Fe | -1.59224477 | -0.08022418 | -0.14549318 |
| N  | 0.20808060  | -1.33816992 | 0.02265042  |
| C  | 1.37305818  | -0.66274121 | 0.04123513  |
| C  | 0.22222078  | -2.65899115 | -0.03475357 |
| C  | 2.62940258  | -1.30495736 | 0.02050872  |
| C  | 1.29891459  | 0.76696537  | 0.08322807  |
| C  | 1.42100912  | -3.38951320 | -0.07015821 |
| H  | -0.75336133 | -3.15101270 | -0.04315183 |
| C  | 2.62476636  | -2.71516735 | -0.03865183 |
| C  | 3.81993386  | -0.50831138 | 0.05857941  |
| C  | 2.48650994  | 1.52800062  | 0.12004936  |
| N  | 0.06922439  | 1.32667792  | 0.08278456  |
| H  | 1.38312311  | -4.47840804 | -0.11847457 |
| H  | 3.57203325  | -3.25859580 | -0.06008033 |
| C  | 3.75064384  | 0.85206353  | 0.10936604  |



|    |             |             |             |
|----|-------------|-------------|-------------|
| H  | 4.78709711  | -1.01495933 | 0.04616593  |
| C  | 2.34750317  | 2.93178273  | 0.16360168  |
| C  | -0.03827037 | 2.64622002  | 0.11977530  |
| H  | 4.66170438  | 1.45308660  | 0.13963067  |
| H  | 3.23839932  | 3.56294788  | 0.19561732  |
| C  | 1.08485644  | 3.48747076  | 0.16355740  |
| H  | -1.05620636 | 3.04306222  | 0.11632935  |
| H  | 0.94119246  | 4.56803774  | 0.19603203  |
| Cl | -2.78058443 | -1.74115997 | 0.82104353  |
| Cl | -3.08226772 | 1.59245070  | 0.24801480  |
| Cl | -1.60517092 | -0.32094100 | -2.35664268 |

**Fe(phen)Cl<sub>3</sub> (S=4)**

Charge = 0 Spin Multiplicity = 4

|    |             |             |             |
|----|-------------|-------------|-------------|
| Fe | 1.34323038  | -0.02924770 | -0.09473967 |
| N  | -0.22727439 | -1.31121117 | -0.18610164 |
| C  | -1.41968337 | -0.67327287 | -0.13520809 |
| C  | -0.19168451 | -2.63344942 | -0.16550018 |
| C  | -2.64939328 | -1.35707452 | -0.07511757 |
| C  | -1.38986445 | 0.75136947  | -0.14048545 |
| C  | -1.36649635 | -3.39966101 | -0.10159810 |
| H  | 0.80151240  | -3.08648649 | -0.21279843 |
| C  | -2.59322557 | -2.76783773 | -0.05957858 |
| C  | -3.86116905 | -0.59213841 | -0.03033800 |
| C  | -2.59054688 | 1.48538639  | -0.08860285 |
| N  | -0.17087476 | 1.33746284  | -0.19238774 |
| H  | -1.29071199 | -4.48744183 | -0.08889636 |
| H  | -3.51846435 | -3.34626004 | -0.01269161 |
| C  | -3.83296472 | 0.77171101  | -0.03729229 |
| H  | -4.81250337 | -1.12612478 | 0.01186714  |

|    |             |             |             |
|----|-------------|-------------|-------------|
| C  | -2.47626767 | 2.89281664  | -0.08746901 |
| C  | -0.08203020 | 2.65749591  | -0.18465303 |
| H  | -4.76144440 | 1.34493652  | -0.00112203 |
| H  | -3.37691152 | 3.50936924  | -0.04805185 |
| C  | -1.22441796 | 3.47267329  | -0.13336565 |
| H  | 0.92965111  | 3.06879475  | -0.22565910 |
| H  | -1.10367474 | 4.55647730  | -0.13173378 |
| Cl | 2.73249489  | -1.60738157 | -0.84381159 |
| Cl | 2.86402522  | 1.52520176  | -0.58235284 |
| Cl | 1.38591454  | -0.10875259 | 2.17599030  |

**Fe(phen)Cl<sub>3</sub> (S=6, bipyramid)**

|    |             |             |             |
|----|-------------|-------------|-------------|
| Fe | -1.52649200 | -0.02258400 | -0.01184800 |
| N  | 0.27349000  | -1.29271200 | -0.04723800 |
| C  | 1.44826200  | -0.64036600 | -0.03462900 |
| C  | 0.25690600  | -2.61361600 | -0.03099700 |
| C  | 2.69250800  | -1.30576500 | -0.01846600 |
| C  | 1.39518900  | 0.79090700  | -0.03993600 |
| C  | 1.44046500  | -3.36839100 | -0.00325100 |
| H  | -0.72675800 | -3.08906100 | -0.04626400 |
| C  | 2.65821200  | -2.71646000 | -0.00020800 |
| C  | 3.89590100  | -0.52728600 | -0.02251600 |
| C  | 2.59487500  | 1.53283200  | -0.04651800 |
| N  | 0.17300200  | 1.36903600  | -0.03775900 |
| H  | 1.38240900  | -4.45736100 | 0.01226000  |
| H  | 3.59380500  | -3.27995200 | 0.01618900  |
| C  | 3.84781700  | 0.83500700  | -0.03946800 |
| H  | 4.85528500  | -1.04858800 | -0.01353700 |
| C  | 2.47858900  | 2.93923100  | -0.05945600 |
| C  | 0.08778700  | 2.69148800  | -0.04675300 |

|    |             |             |             |
|----|-------------|-------------|-------------|
| H  | 4.76852500  | 1.42188000  | -0.04571900 |
| H  | 3.37937700  | 3.55696800  | -0.06901400 |
| C  | 1.22465700  | 3.51472000  | -0.05983300 |
| H  | -0.92330900 | 3.10509000  | -0.04537300 |
| H  | 1.09811700  | 4.59784600  | -0.07002800 |
| Cl | -2.01030100 | -0.87841600 | 1.99642300  |
| Cl | -2.98058100 | 1.72109700  | -0.11002800 |
| Cl | -2.36153800 | -1.28666300 | -1.67600200 |

## 2

Charge = 0 Spin Multiplicity = 1

|   |             |             |             |
|---|-------------|-------------|-------------|
| O | -1.14434602 | 1.67754465  | 1.55156074  |
| C | -2.25516031 | 1.45675323  | 0.87001012  |
| C | -2.09184719 | 0.26779573  | -0.09021809 |
| O | -3.25014151 | 2.13179317  | 0.93979844  |
| C | -3.26164730 | -0.59574705 | -0.36597714 |
| O | -1.01423157 | 0.11511036  | -0.62235973 |
| C | -4.45650078 | -0.53302858 | 0.36776152  |
| C | -3.12793120 | -1.54555347 | -1.39162305 |
| C | -5.49876426 | -1.40762100 | 0.07182672  |
| H | -4.57376276 | 0.20058252  | 1.16515129  |
| C | -4.17306821 | -2.41005229 | -1.68839147 |
| H | -2.18799920 | -1.58490636 | -1.94566391 |
| C | -5.36094552 | -2.34152110 | -0.95509464 |
| H | -6.42642316 | -1.35849934 | 0.64601450  |
| H | -4.06595152 | -3.14248161 | -2.49147612 |
| H | -6.18381281 | -3.02227729 | -1.18607548 |
| H | -1.28130457 | 2.46452479  | 2.10579183  |

Charge = 1 Spin Multiplicity = 1

|   |             |             |             |
|---|-------------|-------------|-------------|
| C | -2.72598838 | 1.23037014  | -0.48360564 |
| H | -2.95099633 | 2.01417388  | 0.26639769  |
| C | -1.26039370 | 1.09761454  | -0.47035653 |
| H | -0.64385438 | 1.93761831  | -0.80712425 |
| C | -3.47333106 | -0.06368823 | -0.20479935 |
| H | -4.49930783 | 0.16120652  | 0.11551502  |
| H | -3.54881137 | -0.65235188 | -1.13283575 |
| N | -0.62489976 | 0.04696485  | -0.07518232 |
| C | -1.32051834 | -1.16819702 | 0.40343842  |
| H | -1.30759076 | -1.89505266 | -0.42307356 |
| H | -0.70691491 | -1.57455842 | 1.21738675  |
| C | -2.73335698 | -0.86503791 | 0.85341768  |
| H | -3.23728056 | -1.81981552 | 1.05804082  |
| H | -2.70315527 | -0.30633291 | 1.80309526  |
| C | 0.81263356  | 0.02231618  | -0.06101045 |
| C | 1.50655847  | 1.06262572  | 0.55551629  |
| C | 1.48261250  | -1.04836772 | -0.65287978 |
| C | 2.89926474  | 1.03742862  | 0.56001483  |
| H | 0.96385790  | 1.87291244  | 1.04672410  |
| C | 2.87458994  | -1.06038139 | -0.63954764 |
| H | 0.92936392  | -1.85445120 | -1.13684786 |
| C | 3.58324094  | -0.02057998 | -0.03673691 |
| H | 3.44927638  | 1.84662066  | 1.04431804  |
| H | 3.40773488  | -1.88874577 | -1.11015844 |
| H | 4.67499103  | -0.03843158 | -0.02808396 |
| H | -3.00270100 | 1.69297014  | -1.44543546 |

43

Charge = 0 Spin Multiplicity = 1

|   |             |             |             |
|---|-------------|-------------|-------------|
| C | -2.65891811 | 1.23468645  | -0.37214010 |
| H | -3.12719144 | 2.18008625  | -0.65524224 |
| C | -1.31471076 | 1.16940852  | -0.36670861 |
| H | -0.71390163 | 2.04207345  | -0.62852467 |
| C | -3.51510881 | 0.06069202  | -0.00959429 |
| H | -4.34536353 | 0.37636470  | 0.64435834  |
| H | -3.99643977 | -0.35851625 | -0.91311641 |
| N | -0.59342389 | 0.01414334  | -0.10235668 |
| C | -1.34860495 | -1.22486400 | -0.02524145 |
| H | -1.52351549 | -1.63266950 | -1.03939314 |
| H | -0.75372499 | -1.96483016 | 0.52637261  |
| C | -2.67746693 | -1.00465453 | 0.68639891  |
| H | -3.21659171 | -1.96194668 | 0.74290746  |
| H | -2.46739745 | -0.69059009 | 1.72231950  |
| C | 0.79587371  | 0.01402166  | -0.04208735 |
| C | 1.51141567  | 1.17796362  | 0.30559352  |
| C | 1.53307099  | -1.15281875 | -0.32531556 |
| C | 2.90190836  | 1.17117889  | 0.35126208  |
| H | 0.97490644  | 2.08993899  | 0.57128290  |
| C | 2.92418689  | -1.14857921 | -0.26089846 |
| H | 1.01877798  | -2.06783592 | -0.62105690 |
| C | 3.62470301  | 0.01032688  | 0.07205628  |
| H | 3.42652549  | 2.08918598  | 0.62891486  |
| H | 3.46674520  | -2.06959828 | -0.48979456 |
| H | 4.71576671  | 0.00889962  | 0.11686594  |

**1'**

Charge = 1 Spin Multiplicity = 1

|   |             |             |            |
|---|-------------|-------------|------------|
| C | -2.69738110 | -0.22746035 | 1.24453352 |
| H | -2.82606669 | -1.32223208 | 1.29879878 |

|   |             |             |             |
|---|-------------|-------------|-------------|
| C | -1.22120167 | 0.11189639  | 1.25271821  |
| H | -0.68373220 | -0.35662952 | 2.08714182  |
| C | -3.39539863 | 0.32634066  | 0.00943791  |
| H | -4.45083418 | 0.01854631  | -0.00020089 |
| H | -3.38481482 | 1.42909233  | 0.04235739  |
| N | -0.55477284 | -0.36685792 | -0.01090985 |
| C | -1.22092310 | 0.19023390  | -1.24198585 |
| H | -1.05835196 | 1.27654018  | -1.21858673 |
| H | -0.68117454 | -0.22290506 | -2.10358094 |
| C | -2.69611219 | -0.15253388 | -1.25582144 |
| H | -3.13361313 | 0.30840357  | -2.15353712 |
| H | -2.82178077 | -1.24261507 | -1.37409706 |
| C | 0.89670207  | -0.15624399 | -0.00467824 |
| C | 1.72546289  | -1.27231510 | -0.03720247 |
| C | 1.41092435  | 1.13658683  | 0.03273371  |
| C | 3.10697793  | -1.08845321 | -0.03195865 |
| H | 1.30106188  | -2.27928441 | -0.06601743 |
| C | 2.79327919  | 1.30651689  | 0.03717767  |
| H | 0.75628899  | 2.00944404  | 0.05814161  |
| C | 3.64026738  | 0.19861306  | 0.00501312  |
| H | 3.76513613  | -1.95893257 | -0.05696256 |
| H | 3.20814504  | 2.31579631  | 0.06602192  |
| H | 4.72287679  | 0.34048729  | 0.00885636  |
| H | -3.13437696 | 0.18101742  | 2.16755247  |
| H | -1.05528317 | 1.19681878  | 1.29832700  |
| H | -0.69265470 | -1.38416478 | -0.04356527 |

### 1·HCl

Charge = 0 Spin Multiplicity = 1

|   |            |             |             |
|---|------------|-------------|-------------|
| C | 2.68083988 | -0.20378674 | -1.24220601 |
|---|------------|-------------|-------------|

|    |             |             |             |
|----|-------------|-------------|-------------|
| H  | 2.77440332  | -1.30155428 | -1.26854332 |
| C  | 1.20522321  | 0.14746967  | -1.24343427 |
| H  | 0.67154395  | -0.32546259 | -2.07871014 |
| C  | 3.38197633  | 0.34515896  | -0.00631837 |
| H  | 4.43790669  | 0.03591557  | 0.00107276  |
| H  | 3.37390441  | 1.44915163  | -0.03165360 |
| N  | 0.54819552  | -0.33532804 | 0.00848743  |
| C  | 1.20454285  | 0.20440425  | 1.23733806  |
| H  | 1.04831740  | 1.29384817  | 1.25021443  |
| H  | 0.67034595  | -0.22968724 | 2.09311752  |
| C  | 2.68013989  | -0.14653064 | 1.25306043  |
| H  | 3.12526622  | 0.29101196  | 2.15909114  |
| H  | 2.77367764  | -1.24193461 | 1.32975968  |
| C  | -0.89567819 | -0.12740748 | 0.00339183  |
| C  | -1.72567389 | -1.24536518 | 0.02920012  |
| C  | -1.42143797 | 1.16332515  | -0.02661577 |
| C  | -3.10812121 | -1.06387787 | 0.02477279  |
| H  | -1.27224902 | -2.24013876 | 0.05230157  |
| C  | -2.80432846 | 1.33153335  | -0.03074038 |
| H  | -0.76862811 | 2.03823676  | -0.04676871 |
| C  | -3.64844535 | 0.22074486  | -0.00511273 |
| H  | -3.76491433 | -1.93629137 | 0.04491507  |
| H  | -3.22292415 | 2.33984827  | -0.05420419 |
| H  | -4.73189817 | 0.35897719  | -0.00849013 |
| H  | 3.12646744  | 0.19177205  | -2.16709498 |
| H  | 1.04903382  | 1.23516913  | -1.30642791 |
| H  | 0.72406211  | -1.41441797 | 0.03329932  |
| Cl | 1.13767716  | -3.23418110 | 0.07525763  |

Charge = 0 Spin Multiplicity = 1

|   |             |             |             |
|---|-------------|-------------|-------------|
| C | -2.69425797 | 1.24599518  | -0.27698482 |
| H | -2.63567618 | 1.69425514  | 0.72979592  |
| C | -1.28487366 | 1.00233982  | -0.79004182 |
| H | -0.71938363 | 1.94094755  | -0.78234630 |
| C | -3.47723457 | -0.05704309 | -0.21371290 |
| H | -4.48094707 | 0.10649751  | 0.20928529  |
| H | -3.62397929 | -0.44454002 | -1.23815044 |
| N | -0.58364728 | 0.00149605  | 0.00150010  |
| C | -1.28536900 | -1.26347099 | 0.09068954  |
| H | -1.31142330 | -1.77710397 | -0.89582489 |
| H | -0.73974474 | -1.92311462 | 0.77916782  |
| C | -2.70545173 | -1.07769390 | 0.60860126  |
| H | -3.21403081 | -2.05460288 | 0.60867200  |
| H | -2.65499255 | -0.73974079 | 1.65798810  |
| C | 0.80823564  | 0.00000483  | -0.00591495 |
| C | 1.53258991  | 1.21079663  | 0.07007516  |
| C | 1.55650007  | -1.19444214 | -0.05651261 |
| C | 2.92181494  | 1.21916273  | 0.10152105  |
| H | 0.99948973  | 2.16064463  | 0.13343498  |
| C | 2.95027921  | -1.17375163 | -0.01392765 |
| H | 1.05185570  | -2.15625152 | -0.14460218 |
| C | 3.65029570  | 0.02771083  | 0.06261571  |
| H | 3.44350128  | 2.17763712  | 0.16936050  |
| H | 3.49321795  | -2.12195203 | -0.05591748 |
| H | 4.74193998  | 0.03898922  | 0.09095810  |
| H | -3.19320162 | 1.97844314  | -0.93096242 |
| H | -1.33481796 | 0.67131733  | -1.85071148 |



Charge = 0 Spin Multiplicity = 1

|   |             |             |             |
|---|-------------|-------------|-------------|
| O | -2.82089014 | 0.24752173  | 0.62916931  |
| C | -2.09753995 | 1.39294092  | 0.57163162  |
| C | -1.47708985 | 1.48936790  | -0.77233746 |
| O | -2.03418178 | 2.14534989  | 1.50613660  |
| C | -0.62156783 | 2.60910547  | -1.17800237 |
| C | -0.89838238 | 3.91531803  | -0.74363549 |
| C | 0.49249999  | 2.39382205  | -2.00477139 |
| C | -0.09309324 | 4.97794736  | -1.14556693 |
| H | -1.75170023 | 4.09273600  | -0.08771302 |
| C | 1.29571394  | 3.45898026  | -2.40440984 |
| H | 0.74437049  | 1.37820691  | -2.31755775 |
| C | 1.00354895  | 4.75507109  | -1.97894869 |
| H | -0.32458539 | 5.98990550  | -0.80474278 |
| H | 2.16086848  | 3.27362455  | -3.04533394 |
| H | 1.63478100  | 5.59046115  | -2.29099863 |
| C | -1.88034162 | 0.41491407  | -1.47972388 |
| C | -2.72515753 | -0.45777496 | -0.59081163 |
| H | -2.19705935 | -1.41084944 | -0.36566609 |
| N | -4.02444187 | -0.70803675 | -1.18122333 |
| C | -3.89667954 | -1.20710757 | -2.54722474 |
| H | -3.36887925 | -2.18403823 | -2.58163460 |
| H | -4.91161492 | -1.37957725 | -2.93168759 |
| C | -4.95470738 | -1.39075341 | -0.35361249 |
| C | -5.51850169 | -0.72421609 | 0.74679923  |
| C | -5.36473503 | -2.70506050 | -0.62243683 |
| C | -6.44518049 | -1.36409620 | 1.56370821  |
| H | -5.22673423 | 0.30651772  | 0.94549514  |
| C | -6.30801115 | -3.33419627 | 0.19077679  |
| H | -4.94604811 | -3.25174435 | -1.46808749 |

|   |             |             |             |
|---|-------------|-------------|-------------|
| C | -6.84884022 | -2.67260281 | 1.29054130  |
| H | -6.87127945 | -0.82582031 | 2.41409856  |
| H | -6.61512166 | -4.35743072 | -0.03976995 |
| H | -7.58560136 | -3.16825887 | 1.92679730  |
| C | -3.16684729 | -0.21939690 | -3.43903448 |
| H | -3.11531230 | -0.62207559 | -4.46123347 |
| H | -3.73743404 | 0.72193448  | -3.47938977 |
| C | -1.75683479 | 0.06150197  | -2.91269371 |
| H | -1.13898685 | -0.84855693 | -3.01565098 |
| H | -1.26153902 | 0.86124679  | -3.47918509 |

## TS1

Charge = 0 Spin Multiplicity = 6

|    |             |             |             |
|----|-------------|-------------|-------------|
| Fe | -1.28315748 | -1.71658742 | 0.77383324  |
| N  | -2.05450096 | 0.28459847  | 1.41456086  |
| C  | -3.03459444 | 0.76278904  | 0.62767282  |
| C  | -1.52945139 | 1.05665367  | 2.34790102  |
| C  | -3.51812762 | 2.08473776  | 0.73398906  |
| C  | -3.58979382 | -0.12930104 | -0.34937450 |
| C  | -1.94204088 | 2.38696335  | 2.53410788  |
| H  | -0.74718304 | 0.61115390  | 2.96758872  |
| C  | -2.92878328 | 2.90475565  | 1.71988781  |
| C  | -4.55743304 | 2.52087996  | -0.15037575 |
| C  | -4.62805440 | 0.32083316  | -1.19291121 |
| N  | -3.08538926 | -1.37982169 | -0.42091617 |
| H  | -1.47249549 | 2.99181436  | 3.31065154  |
| H  | -3.26269523 | 3.93875370  | 1.83166133  |
| C  | -5.09197806 | 1.67233902  | -1.07345937 |
| H  | -4.91613767 | 3.54874506  | -0.06649944 |
| C  | -5.15051800 | -0.60571539 | -2.12065071 |

|    |             |             |             |
|----|-------------|-------------|-------------|
| C  | -3.58616086 | -2.23264604 | -1.29878656 |
| H  | -5.88811825 | 2.00828058  | -1.74100261 |
| H  | -5.95656430 | -0.30121037 | -2.79215782 |
| C  | -4.63413036 | -1.88402952 | -2.16661795 |
| H  | -3.12444888 | -3.22288227 | -1.32348052 |
| H  | -5.01575433 | -2.62486466 | -2.87017941 |
| Cl | -2.20620531 | -2.54898512 | 2.67051926  |
| O  | 0.47690816  | -1.13971157 | 1.46988733  |
| C  | 1.08838050  | -0.13879940 | 0.93119948  |
| C  | 0.36433145  | 0.34305228  | -0.34600733 |
| O  | 2.08958148  | 0.39159755  | 1.37646809  |
| C  | 0.28582917  | 1.78337069  | -0.68938187 |
| O  | -0.54942926 | -0.41991165 | -0.75053291 |
| C  | 1.10378778  | 2.76246291  | -0.10351676 |
| C  | -0.72543377 | 2.18125412  | -1.57980935 |
| C  | 0.91030853  | 4.10724997  | -0.40804153 |
| H  | 1.87041257  | 2.45682835  | 0.60753946  |
| C  | -0.91215127 | 3.52485611  | -1.88250185 |
| H  | -1.36818393 | 1.41539745  | -2.01761293 |
| C  | -0.09395153 | 4.49315455  | -1.29674195 |
| H  | 1.54685689  | 4.86222480  | 0.05909334  |
| H  | -1.70606563 | 3.82092335  | -2.57209010 |
| H  | -0.24296647 | 5.55021986  | -1.52946604 |
| Cl | -0.78073266 | -3.67707248 | -0.29898832 |
| C  | 2.00751593  | -0.27351493 | -1.94841039 |
| H  | 1.47807719  | 0.44844251  | -2.57008557 |
| C  | 3.14185167  | 0.16735190  | -1.31520428 |
| H  | 3.34667247  | 1.23712328  | -1.24073044 |
| C  | 1.74379933  | -1.73000670 | -2.13220551 |
| H  | 0.66600954  | -1.93247318 | -2.01897167 |

|   |            |             |             |
|---|------------|-------------|-------------|
| H | 2.01084377 | -2.02928532 | -3.16226140 |
| N | 4.06697982 | -0.64469818 | -0.76011318 |
| C | 3.97245870 | -2.08367515 | -1.00812673 |
| H | 4.52092848 | -2.32747367 | -1.93550499 |
| H | 4.47590652 | -2.60202087 | -0.18150516 |
| C | 2.52766254 | -2.54032657 | -1.10901092 |
| H | 2.51440080 | -3.61019350 | -1.36146520 |
| H | 2.04156239 | -2.44965018 | -0.12589447 |
| C | 5.18562199 | -0.12633569 | -0.08092988 |
| C | 5.09806125 | 1.08267704  | 0.62604477  |
| C | 6.41027475 | -0.81037519 | -0.11245037 |
| C | 6.21987782 | 1.60372825  | 1.26264737  |
| H | 4.13401696 | 1.58184895  | 0.71625354  |
| C | 7.52303733 | -0.28413648 | 0.54009775  |
| H | 6.50693749 | -1.74620035 | -0.66374302 |
| C | 7.43976619 | 0.92681564  | 1.22548858  |
| H | 6.13065531 | 2.54296006  | 1.81391008  |
| H | 8.46963972 | -0.82841026 | 0.50033588  |
| H | 8.31533941 | 1.33574755  | 1.73421293  |

## TS2'

Charge = 0 Spin Multiplicity = 6

|    |            |             |             |
|----|------------|-------------|-------------|
| Fe | 1.71416474 | 1.07419790  | 0.23905705  |
| N  | 1.98538138 | -1.05416942 | 0.78488928  |
| C  | 3.15943839 | -1.57374620 | 0.37789443  |
| C  | 1.13660085 | -1.80787398 | 1.45719262  |
| C  | 3.52610003 | -2.91342701 | 0.63492051  |
| C  | 4.05810857 | -0.71476111 | -0.33980212 |
| C  | 1.40905747 | -3.15223884 | 1.76113419  |
| H  | 0.19842866 | -1.34130921 | 1.76066405  |

|    |             |             |             |
|----|-------------|-------------|-------------|
| C  | 2.60312941  | -3.70694074 | 1.34926739  |
| C  | 4.79308409  | -3.39506446 | 0.16912045  |
| C  | 5.30113618  | -1.21523133 | -0.78587337 |
| N  | 3.67180666  | 0.55790225  | -0.56132957 |
| H  | 0.67392492  | -3.73641684 | 2.31626144  |
| H  | 2.84375634  | -4.74953015 | 1.56918517  |
| C  | 5.64540752  | -2.57963725 | -0.51322062 |
| H  | 5.06244502  | -4.43335734 | 0.37386792  |
| C  | 6.14132438  | -0.32256970 | -1.48527855 |
| C  | 4.46975491  | 1.38121710  | -1.21816643 |
| H  | 6.60923722  | -2.95334272 | -0.86498862 |
| H  | 7.11223956  | -0.66748009 | -1.84833922 |
| C  | 5.72448325  | 0.97494376  | -1.70066834 |
| H  | 4.09329076  | 2.39748119  | -1.36289130 |
| H  | 6.34988886  | 1.68942130  | -2.23738200 |
| Cl | 2.75264120  | 1.46743662  | 2.28542556  |
| O  | -0.12117055 | 1.23169964  | 1.14972339  |
| C  | -1.26430487 | 0.80654824  | 0.88640825  |
| C  | -2.46308707 | 1.72281787  | 1.14352367  |
| O  | -1.55137155 | -0.32349068 | 0.42583759  |
| C  | -2.67893219 | 2.63133740  | -0.06596834 |
| O  | -2.26551755 | 2.47443400  | 2.30221847  |
| C  | -2.00820288 | 2.45854652  | -1.27957898 |
| C  | -3.58781023 | 3.68846903  | 0.07042682  |
| C  | -2.25568035 | 3.32595071  | -2.34596017 |
| H  | -1.26390254 | 1.66659798  | -1.41028310 |
| C  | -3.83418411 | 4.54914751  | -0.99450933 |
| H  | -4.09325782 | 3.83957726  | 1.02724063  |
| C  | -3.16883908 | 4.36805287  | -2.20955888 |
| H  | -1.71788718 | 3.18444704  | -3.28649506 |

|    |             |             |             |
|----|-------------|-------------|-------------|
| H  | -4.54639243 | 5.36929851  | -0.87598616 |
| H  | -3.35936854 | 5.04532021  | -3.04549561 |
| Cl | 1.77024450  | 3.24053298  | -0.52510360 |
| C  | -3.64624370 | 0.73817401  | 1.31846548  |
| H  | -4.57004886 | 1.26318909  | 1.02820399  |
| C  | -3.42766576 | -0.31363296 | 0.26772077  |
| H  | -3.40228302 | 0.03736210  | -0.76733282 |
| C  | -3.80337141 | 0.16185474  | 2.73522650  |
| H  | -3.20082618 | 0.76049561  | 3.43017643  |
| H  | -4.85230165 | 0.28046760  | 3.04490114  |
| N  | -3.86275487 | -1.55801701 | 0.41451608  |
| C  | -4.15190194 | -2.10484544 | 1.74697005  |
| H  | -5.24066818 | -2.08847953 | 1.92142483  |
| H  | -3.82963123 | -3.15486421 | 1.74942656  |
| C  | -3.42894549 | -1.30942278 | 2.81396671  |
| H  | -3.69475752 | -1.71762379 | 3.79952747  |
| H  | -2.34339086 | -1.44581419 | 2.69057842  |
| C  | -3.85381767 | -2.44402960 | -0.69799879 |
| C  | -2.85293920 | -2.34431373 | -1.67120937 |
| C  | -4.84435312 | -3.42498587 | -0.80690065 |
| C  | -2.86765596 | -3.21048734 | -2.76275750 |
| H  | -2.04513852 | -1.61829171 | -1.55843513 |
| C  | -4.84097226 | -4.29106634 | -1.89751612 |
| H  | -5.62645546 | -3.50325033 | -0.04993738 |
| C  | -3.85825962 | -4.18434682 | -2.88187314 |
| H  | -2.08240829 | -3.12997430 | -3.51790420 |
| H  | -5.62102109 | -5.05121118 | -1.98044850 |
| H  | -3.86074593 | -4.86448273 | -3.73634966 |
| Cl | 0.81422201  | 0.17594990  | -1.75657721 |
| H  | -1.34636318 | 2.78120797  | 2.27218051  |

## TS2''

Charge = 0 Spin Multiplicity = 6

|    |             |             |             |
|----|-------------|-------------|-------------|
| Fe | -2.19345197 | -2.20761440 | -0.63785587 |
| N  | -2.85932391 | -1.38549044 | 1.30071748  |
| C  | -3.75081130 | -0.38505104 | 1.19020090  |
| C  | -2.41206894 | -1.73788336 | 2.49119306  |
| C  | -4.23486654 | 0.32808097  | 2.30802587  |
| C  | -4.21105059 | -0.05630389 | -0.12730493 |
| C  | -2.83359323 | -1.09142417 | 3.66469614  |
| H  | -1.69132916 | -2.55843256 | 2.51712783  |
| C  | -3.74036673 | -0.05516012 | 3.57301869  |
| C  | -5.18339854 | 1.38224721  | 2.10231318  |
| C  | -5.16034720 | 0.97201676  | -0.29933854 |
| N  | -3.71198353 | -0.76540622 | -1.16028490 |
| H  | -2.43194024 | -1.40914819 | 4.62740213  |
| H  | -4.07945064 | 0.47244777  | 4.46742288  |
| C  | -5.62965965 | 1.68780414  | 0.85047909  |
| H  | -5.54762118 | 1.93391749  | 2.97151647  |
| C  | -5.59609803 | 1.22941493  | -1.61640360 |
| C  | -4.11749498 | -0.49700093 | -2.38882671 |
| H  | -6.35817076 | 2.48772443  | 0.70224758  |
| H  | -6.33548100 | 2.01318851  | -1.79689149 |
| C  | -5.07883318 | 0.48970891  | -2.65827621 |
| H  | -3.65704290 | -1.08674710 | -3.18525488 |
| H  | -5.39086522 | 0.66595761  | -3.68834327 |
| Cl | -3.61754249 | -3.94392237 | -0.29499176 |
| O  | -0.61069046 | -2.90501857 | 0.28909996  |
| C  | 0.47105166  | -2.22729260 | 0.39530065  |
| C  | 0.32584437  | -0.68323841 | 0.15301602  |

|    |             |             |             |
|----|-------------|-------------|-------------|
| O  | 1.55400841  | -2.70845357 | 0.69435032  |
| C  | 0.20506320  | 0.00993862  | 1.51300573  |
| O  | -0.87583822 | -0.55314848 | -0.55077298 |
| C  | 0.93652989  | -0.39437008 | 2.63561604  |
| C  | -0.68415246 | 1.08624415  | 1.63831877  |
| C  | 0.80140293  | 0.27873252  | 3.85114014  |
| H  | 1.59999810  | -1.25891633 | 2.57261838  |
| C  | -0.82713958 | 1.74607585  | 2.85608449  |
| H  | -1.26169086 | 1.41734308  | 0.77123132  |
| C  | -0.07975054 | 1.35142776  | 3.96691661  |
| H  | 1.38346782  | -0.04996238 | 4.71525563  |
| H  | -1.52970046 | 2.57944321  | 2.93525148  |
| H  | -0.19195241 | 1.87193945  | 4.92072748  |
| Cl | -1.57627293 | -2.62633544 | -2.82074051 |
| C  | 1.54820458  | -0.18791976 | -0.68423793 |
| H  | 1.93439827  | 1.22569513  | -0.33052245 |
| C  | 2.75413841  | -0.73599136 | -0.20234193 |
| H  | 2.92150684  | -0.79212224 | 0.87136526  |
| C  | 1.36890330  | -0.23781268 | -2.20185361 |
| H  | 0.31499213  | -0.41639154 | -2.44424604 |
| H  | 1.62217053  | 0.73734831  | -2.64715036 |
| N  | 3.78897994  | -1.11309297 | -0.94361503 |
| C  | 3.68468370  | -1.15312949 | -2.40511583 |
| H  | 4.10876024  | -0.22649240 | -2.82803158 |
| H  | 4.30342630  | -1.99019350 | -2.75512663 |
| C  | 2.23870755  | -1.31849751 | -2.82375038 |
| H  | 2.18428432  | -1.28590931 | -3.92148442 |
| H  | 1.87785768  | -2.31134536 | -2.50917283 |
| C  | 4.98296972  | -1.58391875 | -0.32936106 |
| C  | 4.90946737  | -2.35579764 | 0.83495691  |



|    |             |             |             |
|----|-------------|-------------|-------------|
| C  | 6.22478493  | -1.28160135 | -0.89625304 |
| C  | 6.08231330  | -2.79110072 | 1.44643121  |
| H  | 3.93220211  | -2.63951848 | 1.23083545  |
| C  | 7.39049969  | -1.73151367 | -0.28011448 |
| H  | 6.28635129  | -0.68405408 | -1.80721086 |
| C  | 7.32534522  | -2.47879861 | 0.89545465  |
| H  | 6.02030811  | -3.39657347 | 2.35347315  |
| H  | 8.35863226  | -1.48680206 | -0.72264878 |
| H  | 8.24226294  | -2.82657859 | 1.37603213  |
| Cl | -1.76649182 | 1.80161911  | -1.79593519 |
| H  | -1.11208204 | 0.36927500  | -0.98940638 |
| C  | 4.82242182  | 2.06417610  | -0.16541558 |
| H  | 4.77031227  | 0.98412989  | -0.35091592 |
| C  | 3.62339212  | 2.75956340  | -0.77982730 |
| H  | 3.53030676  | 2.46186998  | -1.82976047 |
| C  | 4.93841479  | 2.31502720  | 1.32624734  |
| H  | 5.77822252  | 1.74399365  | 1.74988701  |
| H  | 5.14469469  | 3.38288364  | 1.51542861  |
| N  | 2.31635906  | 2.49611236  | -0.10077495 |
| C  | 2.45362795  | 2.66031348  | 1.37237267  |
| H  | 2.56514455  | 3.73923046  | 1.57404536  |
| H  | 1.51949049  | 2.32521945  | 1.83418486  |
| C  | 3.62863866  | 1.92313563  | 1.98391005  |
| H  | 3.62716442  | 2.15769616  | 3.05902500  |
| H  | 3.47975483  | 0.83563335  | 1.91674850  |
| C  | 1.29290481  | 3.37819902  | -0.65277065 |
| C  | 1.23598683  | 3.59758680  | -2.03385071 |
| C  | 0.38133309  | 4.04526469  | 0.17032570  |
| C  | 0.31153611  | 4.48541393  | -2.57181311 |
| H  | 1.91204834  | 3.07980706  | -2.71299512 |

|   |             |            |             |
|---|-------------|------------|-------------|
| C | -0.54809192 | 4.92709291 | -0.37809109 |
| H | 0.37495047  | 3.89307886 | 1.24670206  |
| C | -0.58196082 | 5.16394507 | -1.74739097 |
| H | 0.29061869  | 4.63920125 | -3.65301037 |
| H | -1.24954080 | 5.43596463 | 0.28724185  |
| H | -1.30693840 | 5.86188925 | -2.17184634 |
| H | 5.71129688  | 2.42248473 | -0.70646925 |
| H | 3.77477033  | 3.85214329 | -0.76158279 |

## TS2

Charge = 0 Spin Multiplicity = 6

|    |            |             |             |
|----|------------|-------------|-------------|
| Fe | 2.20630531 | -1.40422568 | -0.96891306 |
| N  | 2.54485053 | 0.77145583  | -1.08177407 |
| C  | 3.08033439 | 1.31191029  | 0.02721149  |
| C  | 2.20477848 | 1.55063740  | -2.09147339 |
| C  | 3.29493598 | 2.69901540  | 0.16981585  |
| C  | 3.42472398 | 0.41904681  | 1.09460657  |
| C  | 2.37723916 | 2.94388944  | -2.04693518 |
| H  | 1.77541044 | 1.05607732  | -2.96592294 |
| C  | 2.91791406 | 3.51889286  | -0.91543970 |
| C  | 3.85931247 | 3.19524671  | 1.38962294  |
| C  | 3.98812762 | 0.93341793  | 2.28211844  |
| N  | 3.18449852 | -0.89825877 | 0.91486771  |
| H  | 2.07264371 | 3.55026512  | -2.90043689 |
| H  | 3.05453258 | 4.60044795  | -0.84802068 |
| C  | 4.19349990 | 2.34700310  | 2.40327216  |
| H  | 4.01757086 | 4.27081040  | 1.49161653  |
| C  | 4.31583323 | 0.00434939  | 3.29279560  |
| C  | 3.49817067 | -1.75378582 | 1.87478125  |
| H  | 4.62544750 | 2.73126298  | 3.32954862  |

|    |             |             |             |
|----|-------------|-------------|-------------|
| H  | 4.75532585  | 0.35736531  | 4.22850560  |
| C  | 4.07550937  | -1.33839709 | 3.08534687  |
| H  | 3.26841110  | -2.80345343 | 1.67471419  |
| H  | 4.31764306  | -2.08180141 | 3.84563417  |
| Cl | 4.03611531  | -1.70595340 | -2.24602846 |
| O  | 0.79468970  | -1.15718428 | -2.30274599 |
| C  | -0.40633494 | -0.76983561 | -2.04093907 |
| C  | -0.64291495 | -0.27242657 | -0.58139500 |
| O  | -1.32697276 | -0.75790725 | -2.83549042 |
| C  | -0.71746678 | 1.25347044  | -0.55595682 |
| O  | 0.50019846  | -0.70329191 | 0.15388136  |
| C  | -1.32394741 | 1.98191976  | -1.58727380 |
| C  | -0.18684393 | 1.94653603  | 0.53718603  |
| C  | -1.38910495 | 3.37305710  | -1.52649861 |
| H  | -1.74307458 | 1.44894752  | -2.44205025 |
| C  | -0.25183485 | 3.33731395  | 0.59509380  |
| H  | 0.28497159  | 1.39737356  | 1.35261514  |
| C  | -0.85127544 | 4.05689952  | -0.43718511 |
| H  | -1.86152822 | 3.92520454  | -2.34239215 |
| H  | 0.17696626  | 3.86004098  | 1.45338635  |
| H  | -0.89752086 | 5.14750880  | -0.39356679 |
| Cl | 1.76408448  | -3.55394188 | -0.29639540 |
| C  | -1.87885237 | -0.96523742 | -0.03800350 |
| H  | -1.65339636 | -0.71299247 | 1.53148184  |
| C  | -3.08006583 | -0.29324849 | 0.00284881  |
| H  | -3.09116916 | 0.79346440  | -0.09447799 |
| C  | -1.87453823 | -2.48161948 | -0.05362997 |
| H  | -1.12308508 | -2.84976579 | -0.76821213 |
| H  | -1.55673669 | -2.87374195 | 0.92767573  |
| N  | -4.27197134 | -0.86984730 | 0.23655726  |

|    |             |             |             |
|----|-------------|-------------|-------------|
| C  | -4.32982505 | -2.31807810 | 0.42145325  |
| H  | -4.20088498 | -2.56055167 | 1.49066752  |
| H  | -5.32946913 | -2.65799171 | 0.12025407  |
| C  | -3.25768689 | -3.00187868 | -0.40892254 |
| H  | -3.32484001 | -4.08707226 | -0.24775473 |
| H  | -3.45650259 | -2.81176205 | -1.47614313 |
| C  | -5.44819404 | -0.09682797 | 0.35990369  |
| C  | -5.61232658 | 1.08184315  | -0.38144442 |
| C  | -6.47047261 | -0.51140780 | 1.22331255  |
| C  | -6.76976329 | 1.84147379  | -0.23786077 |
| H  | -4.84609643 | 1.39774324  | -1.09187706 |
| C  | -7.63075987 | 0.24969558  | 1.34798276  |
| H  | -6.35583724 | -1.41980292 | 1.81608333  |
| C  | -7.78632477 | 1.43128726  | 0.62504481  |
| H  | -6.88297725 | 2.75609048  | -0.82452230 |
| H  | -8.41686466 | -0.08488628 | 2.02890391  |
| H  | -8.69641864 | 2.02595749  | 0.72782830  |
| Cl | -1.03721118 | -0.79414456 | 2.82787185  |
| H  | 0.28676841  | -0.90005087 | 1.08670695  |

### TS3

Charge = 0 Spin Multiplicity = 6

|    |            |             |             |
|----|------------|-------------|-------------|
| Fe | 0.64821305 | -1.12303468 | -0.85604043 |
| N  | 2.51744750 | 0.04753113  | -0.86593369 |
| C  | 3.44202438 | -0.38009159 | 0.01332480  |
| C  | 2.73559162 | 1.14336460  | -1.56728591 |
| C  | 4.65133346 | 0.31558820  | 0.23608866  |
| C  | 3.17769221 | -1.60057083 | 0.72601042  |
| C  | 3.90683828 | 1.90433409  | -1.41876419 |
| H  | 1.95449533 | 1.43148048  | -2.27398098 |

|    |             |             |             |
|----|-------------|-------------|-------------|
| C  | 4.86149263  | 1.49463069  | -0.51096509 |
| C  | 5.59293467  | -0.20333898 | 1.18449707  |
| C  | 4.13219788  | -2.09616992 | 1.64211826  |
| N  | 2.01685377  | -2.23782393 | 0.47758277  |
| H  | 4.03974358  | 2.80845277  | -2.01350983 |
| H  | 5.78006189  | 2.06804836  | -0.36630182 |
| C  | 5.34446475  | -1.36169355 | 1.85817029  |
| H  | 6.52082574  | 0.34764481  | 1.35203206  |
| C  | 3.82561470  | -3.30820847 | 2.29743386  |
| C  | 1.74591239  | -3.37095603 | 1.09807004  |
| H  | 6.06973444  | -1.75393866 | 2.57429815  |
| H  | 4.53499904  | -3.72796359 | 3.01438583  |
| C  | 2.63405238  | -3.94745955 | 2.02205250  |
| H  | 0.78223769  | -3.83010355 | 0.85933829  |
| H  | 2.36903808  | -4.88606811 | 2.51064669  |
| Cl | 1.52164509  | -2.34546021 | -2.63927670 |
| O  | -0.22554446 | 0.23710149  | -2.03828490 |
| C  | -0.94077789 | 1.23380749  | -1.69594706 |
| C  | -0.87165322 | 1.75660212  | -0.26086104 |
| O  | -1.65417699 | 1.88994933  | -2.44415563 |
| C  | 0.23894627  | 2.71571825  | -0.03887794 |
| O  | 0.24570404  | -0.06690362 | 0.69638123  |
| C  | 0.43402173  | 3.74010531  | -0.97875055 |
| C  | 1.09902308  | 2.63142701  | 1.06578933  |
| C  | 1.45809686  | 4.66935165  | -0.80568678 |
| H  | -0.23014620 | 3.80531209  | -1.84285142 |
| C  | 2.12634033  | 3.55561709  | 1.22592290  |
| H  | 0.98163130  | 1.78986092  | 1.74745439  |
| C  | 2.30800665  | 4.57982823  | 0.29517136  |
| H  | 1.59385162  | 5.46427336  | -1.54264186 |

|    |             |             |             |
|----|-------------|-------------|-------------|
| H  | 2.80163985  | 3.46612950  | 2.08017802  |
| H  | 3.11832901  | 5.30130923  | 0.42342051  |
| Cl | -1.22254749 | -2.50891795 | -0.42650566 |
| C  | -1.98864640 | 1.70264574  | 0.56072970  |
| C  | -3.02562242 | 0.83537220  | 0.17731298  |
| H  | -2.91521665 | 0.21563195  | -0.71511950 |
| C  | -2.13437792 | 2.48873947  | 1.83647043  |
| H  | -1.16557110 | 2.57972549  | 2.34336494  |
| H  | -2.45569824 | 3.51725242  | 1.59599075  |
| N  | -4.16563840 | 0.69408756  | 0.83141209  |
| C  | -4.43683299 | 1.51406705  | 2.01830899  |
| H  | -4.94106133 | 2.44119698  | 1.70036328  |
| H  | -5.13260671 | 0.95302065  | 2.65454328  |
| C  | -3.14767554 | 1.82347870  | 2.75417841  |
| H  | -3.38025798 | 2.46721450  | 3.61370398  |
| H  | -2.73172211 | 0.88384868  | 3.15339760  |
| C  | -5.14609609 | -0.24287053 | 0.40075109  |
| C  | -4.74999291 | -1.48639403 | -0.10166529 |
| C  | -6.50237733 | 0.08581752  | 0.48990559  |
| C  | -5.71779016 | -2.38793178 | -0.53688693 |
| H  | -3.69162462 | -1.76226445 | -0.12968868 |
| C  | -7.45925492 | -0.82919605 | 0.05827754  |
| H  | -6.81344543 | 1.05836318  | 0.87400372  |
| C  | -7.07244751 | -2.06516655 | -0.45971084 |
| H  | -5.40412564 | -3.35949757 | -0.92516726 |
| H  | -8.51746092 | -0.56654470 | 0.12145124  |
| H  | -7.82725618 | -2.77880247 | -0.79678910 |
| H  | -0.52507454 | -0.46935598 | 1.11906004  |

**TS3'**

Charge = 0 Spin Multiplicity = 1

|   |             |             |             |
|---|-------------|-------------|-------------|
| O | -0.86369096 | 1.69838834  | 2.22063472  |
| C | -0.40536989 | 1.12016424  | 1.26990062  |
| C | -1.14300957 | 0.48759469  | 0.11517105  |
| O | 0.89179701  | 0.92503783  | 1.09051981  |
| C | -2.43841456 | 0.81898809  | -0.28169592 |
| O | -1.78896354 | -1.05518235 | 1.89070084  |
| C | -3.22599129 | 1.77569684  | 0.43688938  |
| C | -3.01124801 | 0.18822854  | -1.43130704 |
| C | -4.46183990 | 2.14214302  | -0.03446979 |
| H | -2.81517379 | 2.22090467  | 1.34224331  |
| C | -4.24746914 | 0.60997455  | -1.91795628 |
| H | -2.42531704 | -0.53068006 | -2.00176147 |
| C | -4.96170058 | 1.57731100  | -1.22891510 |
| H | -5.05323084 | 2.88697341  | 0.50084645  |
| H | -4.65321757 | 0.16234790  | -2.82610153 |
| H | -5.93076601 | 1.90766425  | -1.61103905 |
| C | -0.15345673 | -0.28549874 | -0.68536223 |
| H | -0.29463053 | -0.03439221 | -1.74557465 |
| C | 1.19168815  | 0.31181792  | -0.21911834 |
| H | 1.45395948  | 1.15883074  | -0.86559147 |
| C | -0.21312724 | -1.82457750 | -0.54558614 |
| H | -1.25601730 | -2.13810039 | -0.39584491 |
| H | 0.12445599  | -2.25475078 | -1.50150514 |
| N | 2.28677753  | -0.55113811 | -0.14213069 |
| C | 2.13481960  | -1.94786063 | 0.25277162  |
| H | 2.48345568  | -2.59897930 | -0.56810424 |
| H | 2.78442453  | -2.14957119 | 1.12097037  |
| C | 0.69569321  | -2.29189460 | 0.57150879  |
| H | 0.61756531  | -3.38252396 | 0.69225827  |

|    |             |             |             |
|----|-------------|-------------|-------------|
| H  | 0.37641590  | -1.84375853 | 1.52320410  |
| C  | 3.57817641  | -0.02578252 | -0.25927568 |
| C  | 3.82480435  | 1.35816939  | -0.17430716 |
| C  | 4.67711481  | -0.88215890 | -0.45740908 |
| C  | 5.11427528  | 1.86009688  | -0.32694139 |
| H  | 3.01520076  | 2.05327628  | 0.05005529  |
| C  | 5.96308308  | -0.36636918 | -0.59800216 |
| H  | 4.53184616  | -1.96018287 | -0.51927212 |
| C  | 6.19567955  | 1.00689127  | -0.54322699 |
| H  | 5.27276611  | 2.93906523  | -0.25506604 |
| H  | 6.79478961  | -1.05715043 | -0.75811123 |
| H  | 7.20600888  | 1.40585880  | -0.65454573 |
| H  | -2.50943054 | -1.44823687 | 1.32687375  |
| H  | -2.23072269 | -0.36301725 | 2.39974702  |
| Cl | -3.80372869 | -2.07439350 | -0.05459185 |

#### TS4'

Charge = 0 Spin Multiplicity = 6

|    |             |             |             |
|----|-------------|-------------|-------------|
| Fe | -1.10925644 | -0.97068253 | 1.11234714  |
| N  | -2.63463975 | 0.36704968  | 0.22990916  |
| C  | -3.64271711 | -0.26366867 | -0.39993293 |
| C  | -2.62232879 | 1.68454407  | 0.28853267  |
| C  | -4.69661437 | 0.43249296  | -1.03186436 |
| C  | -3.63011433 | -1.69841923 | -0.40325089 |
| C  | -3.62575854 | 2.46704916  | -0.30873674 |
| H  | -1.78904237 | 2.13800132  | 0.82789106  |
| C  | -4.66025087 | 1.84264354  | -0.97441874 |
| C  | -5.73437736 | -0.31129814 | -1.68308053 |
| C  | -4.66943569 | -2.40574942 | -1.04710563 |
| N  | -2.61216536 | -2.31927483 | 0.22617820  |



|    |             |             |             |
|----|-------------|-------------|-------------|
| H  | -3.56736476 | 3.55383555  | -0.23748236 |
| H  | -5.45328778 | 2.42310615  | -1.45140700 |
| C  | -5.72065437 | -1.67417184 | -1.69098848 |
| H  | -6.54124220 | 0.23876460  | -2.17202144 |
| C  | -4.60673865 | -3.81510934 | -1.01163918 |
| C  | -2.57032863 | -3.63959348 | 0.25067790  |
| H  | -6.51566866 | -2.23487871 | -2.18709059 |
| H  | -5.38929621 | -4.40264057 | -1.49726351 |
| C  | -3.55701991 | -4.43038446 | -0.36137648 |
| H  | -1.71763959 | -4.07884961 | 0.77564237  |
| H  | -3.47890185 | -5.51733604 | -0.31401825 |
| Cl | -2.43201469 | -0.79840945 | 3.01481685  |
| O  | 0.02005099  | 0.63443746  | 1.61602562  |
| C  | 1.15638332  | 0.82694972  | 1.08665484  |
| C  | 1.39202156  | 2.04396858  | 0.24423826  |
| O  | 2.13009141  | 0.04965031  | 1.17530960  |
| C  | 0.51957708  | 3.21818323  | 0.31388791  |
| C  | 0.07131002  | 3.69488600  | 1.55700897  |
| C  | 0.08793371  | 3.86249924  | -0.85563966 |
| C  | -0.77800311 | 4.79493555  | 1.62558152  |
| H  | 0.38609971  | 3.19043528  | 2.47240235  |
| C  | -0.76677758 | 4.96010259  | -0.78463493 |
| H  | 0.39807706  | 3.47608100  | -1.82870420 |
| C  | -1.20009657 | 5.42964132  | 0.45529092  |
| H  | -1.11819247 | 5.15739646  | 2.59817412  |
| H  | -1.10468396 | 5.44445141  | -1.70350700 |
| H  | -1.87361690 | 6.28802910  | 0.51093567  |
| Cl | 0.17862857  | -2.73196113 | 1.83955792  |
| C  | 2.47699430  | 1.89459045  | -0.54897463 |
| C  | 3.10773728  | 0.56780198  | -0.50763588 |

|    |             |             |             |
|----|-------------|-------------|-------------|
| H  | 2.56831073  | -0.30109627 | -0.89960728 |
| C  | 3.18104837  | 2.93662824  | -1.36668352 |
| H  | 2.89401091  | 2.83604647  | -2.42571603 |
| H  | 2.83225980  | 3.92719786  | -1.04275037 |
| N  | 4.42005944  | 0.52018192  | -0.43940144 |
| C  | 5.10906112  | 1.78579215  | -0.15902402 |
| H  | 4.82978332  | 2.12744068  | 0.84987437  |
| H  | 6.18915722  | 1.60438149  | -0.17360125 |
| C  | 4.71264718  | 2.80137995  | -1.22518389 |
| H  | 5.15770125  | 3.77157531  | -0.96347367 |
| H  | 5.15919294  | 2.48914308  | -2.18026435 |
| C  | 5.14259698  | -0.69581149 | -0.60500238 |
| C  | 4.80662861  | -1.57200556 | -1.63985175 |
| C  | 6.17854064  | -1.00820821 | 0.27797218  |
| C  | 5.50476604  | -2.76845307 | -1.78084580 |
| H  | 4.01372906  | -1.31214277 | -2.34407933 |
| C  | 6.87687002  | -2.20341115 | 0.12173843  |
| H  | 6.42746560  | -0.32988586 | 1.09613554  |
| C  | 6.54146258  | -3.08697565 | -0.90359757 |
| H  | 5.24259838  | -3.44971185 | -2.59314213 |
| H  | 7.68367269  | -2.44779281 | 0.81600889  |
| H  | 7.09021217  | -4.02377991 | -1.02118079 |
| Cl | -0.16783642 | -0.88329074 | -1.09425255 |

#### TS4

Charge = 0 Spin Multiplicity = 1

|   |             |            |             |
|---|-------------|------------|-------------|
| O | 0.04048890  | 2.22549845 | 0.43829695  |
| C | -1.13286623 | 1.99864655 | 0.04949708  |
| C | -1.51707615 | 0.50446223 | -0.09369831 |
| O | -2.01481149 | 2.82539872 | -0.22095816 |

|   |             |             |             |
|---|-------------|-------------|-------------|
| C | -2.94113768 | 0.16060360  | -0.15187012 |
| C | -3.87178757 | 0.80716799  | 0.68145157  |
| C | -3.41018381 | -0.81528672 | -1.04887894 |
| C | -5.21932533 | 0.46479930  | 0.63736552  |
| H | -3.52444430 | 1.57999749  | 1.36706277  |
| C | -4.76223236 | -1.14102766 | -1.10756681 |
| H | -2.70646323 | -1.30159211 | -1.72810356 |
| C | -5.66966432 | -0.50723514 | -0.25809806 |
| H | -5.92736168 | 0.96525976  | 1.30215921  |
| H | -5.10948977 | -1.89164995 | -1.82132401 |
| H | -6.73050452 | -0.76613411 | -0.29814394 |
| C | -0.54042266 | -0.45378534 | -0.11201750 |
| C | 0.82693835  | -0.02977029 | -0.25118758 |
| H | 1.05326530  | 0.90475314  | -0.75619397 |
| N | 1.85616788  | -0.75457597 | 0.11096049  |
| C | 1.70865306  | -2.09021817 | 0.71013493  |
| H | 2.00196909  | -2.82445808 | -0.05648646 |
| H | 2.43035937  | -2.16483424 | 1.53476998  |
| C | 3.17681404  | -0.23476582 | -0.05218992 |
| C | 3.39372933  | 1.13417742  | 0.13846525  |
| C | 4.23667724  | -1.08609968 | -0.37228406 |
| C | 4.67625264  | 1.65083786  | -0.01994278 |
| H | 2.56105152  | 1.78158469  | 0.42600884  |
| C | 5.51544773  | -0.55487883 | -0.52384677 |
| H | 4.07261104  | -2.15362605 | -0.52122970 |
| C | 5.73924508  | 0.81065793  | -0.35208978 |
| H | 4.84600920  | 2.71880171  | 0.13243279  |
| H | 6.34268545  | -1.21878708 | -0.78346526 |
| H | 6.74489962  | 1.21963132  | -0.47010495 |
| C | 0.29478304  | -2.35064375 | 1.18243648  |

|   |             |             |             |
|---|-------------|-------------|-------------|
| H | 0.20239758  | -3.42194795 | 1.41115319  |
| H | 0.10807206  | -1.80182345 | 2.11913327  |
| C | -0.73005697 | -1.92565158 | 0.13562905  |
| H | -0.58582115 | -2.50680051 | -0.79136799 |
| H | -1.74919329 | -2.12693664 | 0.48814727  |

## References

1. T. Feng, S. Wang, Y. Liu, S. Liu and Y. Qiu, *Angew. Chem. Int. Ed.*, 2022, **61**, e202115178.
2. H. L. K. Wah, M. Pastel, F. Tomi, F. Agbossou, D. Ballivet-Tkatchenko and F. Urso, *Inorg. Chim. Acta*, 1993, **205**, 113–118.
3. M.-Y. Hu, Q. He, S.-J. Fan, Z.-C. Wang, L.-Y. Liu, Y.-J. Mu, Q. Peng and S.-F. Zhu, *Nat. Commun.*, 2018, **9**, 221.
4. X. Shi, Y. He, X. Zhang and X. Fan, *Adv. Synth. Catal.*, 2018, **360**, 261–266.
5. R. D. Jana, D. Sheet, S. Chatterjee and T. K. Paine, *Inorg. Chem.*, 2018, **57**, 8769–8777.
6. M. J. Frisch, et al. Gaussian 16, Revision A.03, Gaussian, Inc., Wallingford CT, 2013.
7. S. Grimme, J. Antony, S. Ehrlich and H. Krieg, *J. Chem. Phys.*, 2010, **132**, 154104.
8. S. Grimme, S. Ehrlich and L. Goerigk, *J. Comp. Chem.*, 2011, **32**, 1456–1465.
9. C. Adamo and V. Barone, *J. Chem. Phys.*, 1999, **110**, 6158.
10. J. Zheng, X. Xu and D. G. Truhlar, *Theor. Chem. Acc.*, 2011, **128**, 295–305.
11. A. V. Marenich, C. J. Cramer and D. G. Truhlar, *J. Phys. Chem.*, 2009, **113**, 6378–6396.
12. F. Weigend and R. Ahlrichs, *Phys. Chem. Chem. Phys.*, 2005, **7**, 3297–3305.
13. J. Tomasia, B. Mennuccia and E. Cancèsb, *J. Mol. Struct. (Theochem)*, 1999, **464**, 211–226.
14. T. Lu and Q. Chen, *Comput. Theor. Chem.*, 2021, **1200**, 113249.
15. S. Grimme, *Chem. Eur. J.*, 2012, **18**, 9955–9964.
16. H. B. Schlegel, *J. Comp. Chem.*, 1982, **3**, 214–218.
17. CYLview20; C. Y. Legault, Université de Sherbrooke. <http://www.cylview.org>, 2020.
18. J. P. Merrick, D. Moran, L. Radom, *J. Phys. Chem., A* 2007, **111**, 11683–11700.
19. T. Shimanouchi, *J. Phys. Chem. Ref. Data*, 1977, **6**, 993–1102.
20. (a) M. Jacox, *J. Phys. Chem. Ref. Data*, 1998, **27**, 115; (b) M. Jacox, *J. Phys. Chem.*

- Ref. Data*, 2003, **32**, 1; (c) M. Jacox, *J. Phys. Chem. Ref. Data*, 1990, **19**, 1387.
21. W. Allen, Y. Yamaguchi, A. Csaszar, D. Clabo, R. Remington and H. Schaefer, *Chem. Phys.*, 1990, **145**, 427.
22. D. Clabo, W. Allen, R. Remington, Yamaguchi, Y and H. Schaefer, *Chem. Phys.*, 1988, **123**, 187.
23. J. Duncan and M. Law, *J. Mol. Spectrosc.*, 1990, **140**, 13.
24. J. Martin, T. Lee, P. Taylor and J. Francois, *J. Chem. Phys.*, 1995, **103**, 2589.
25. K. Huber and G. Herzberg, *Molecular Spectra and Molecular Structure. IV. Constants of Diatomic Molecules*, Van Nostrand Reinhold: New York, 1979.
26. A. Katron, E. Rabinovich, J. Martin and B. Ruscic, *J. Chem. Phys.*, 2006, **125**, 144108.

# NMR Spectrum

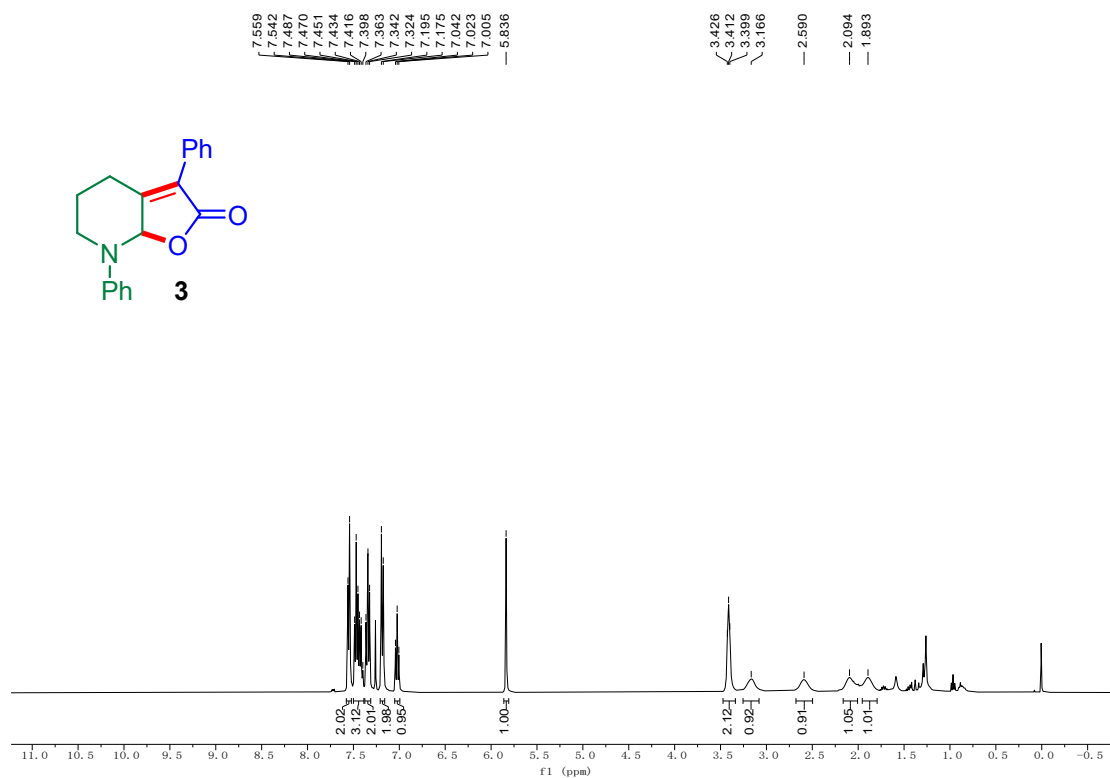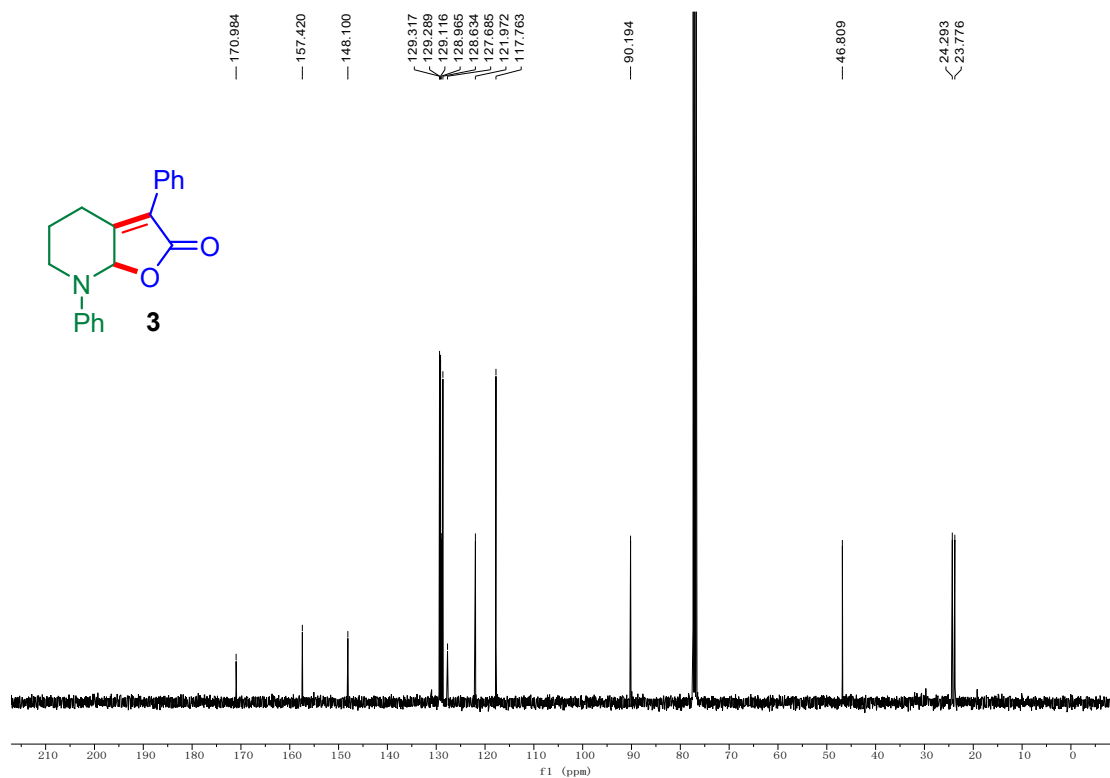

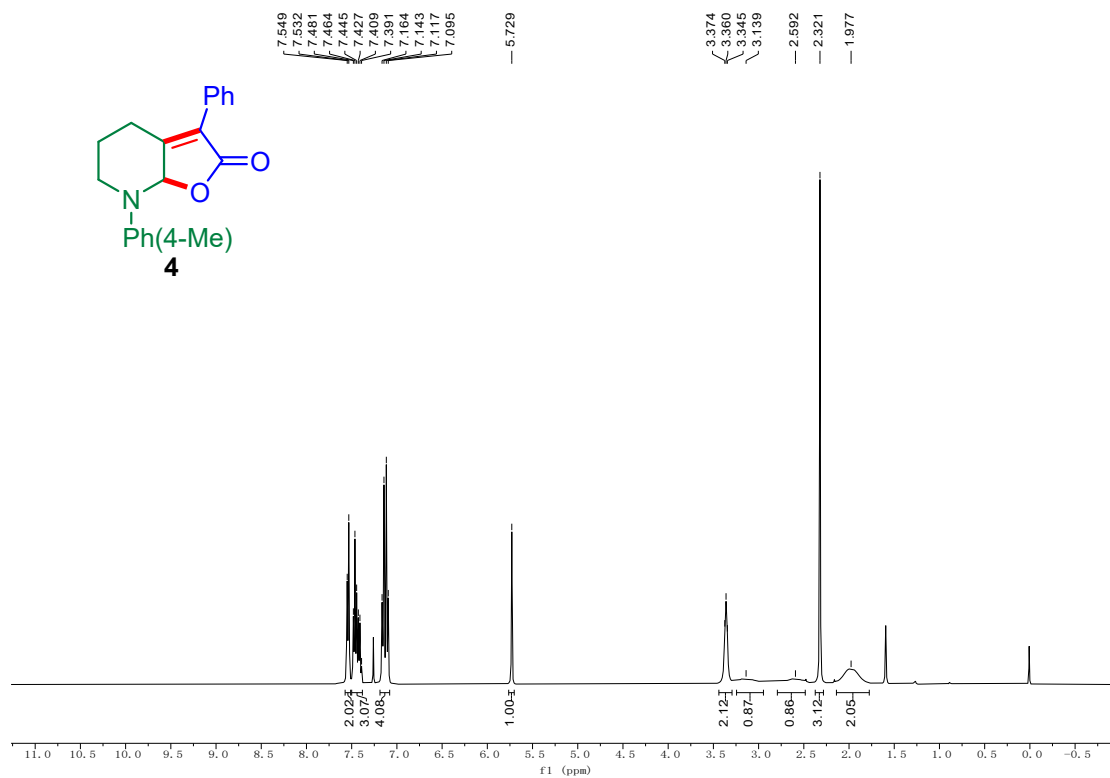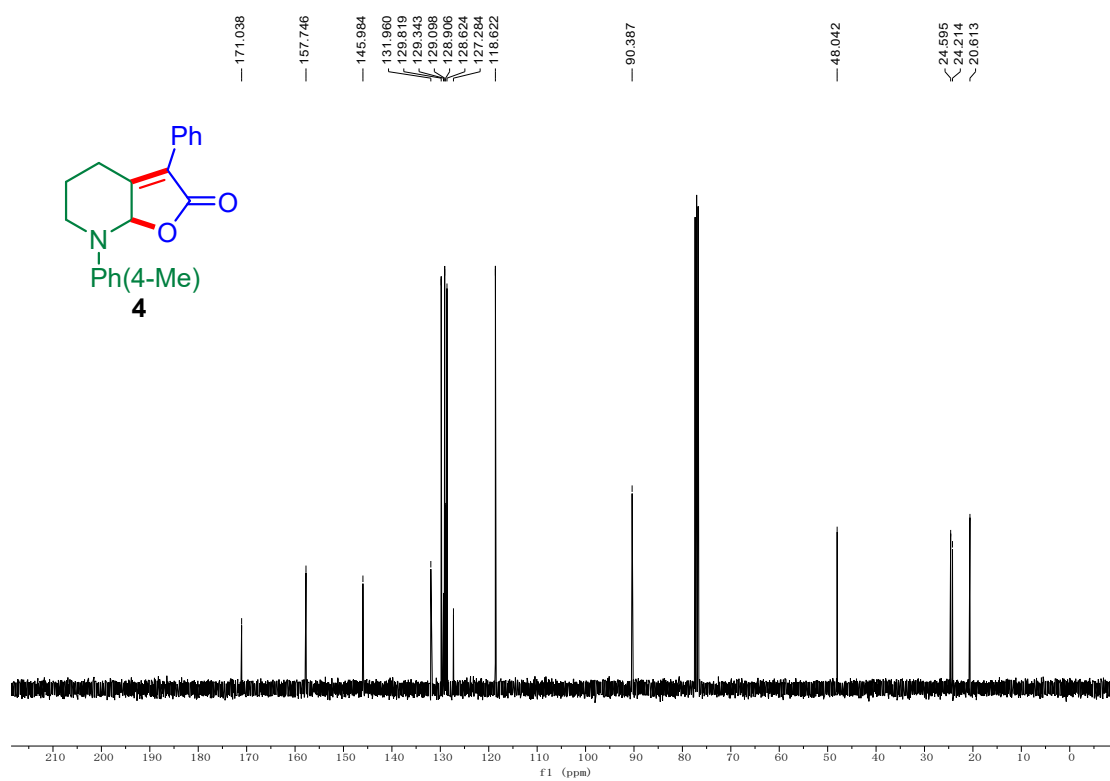



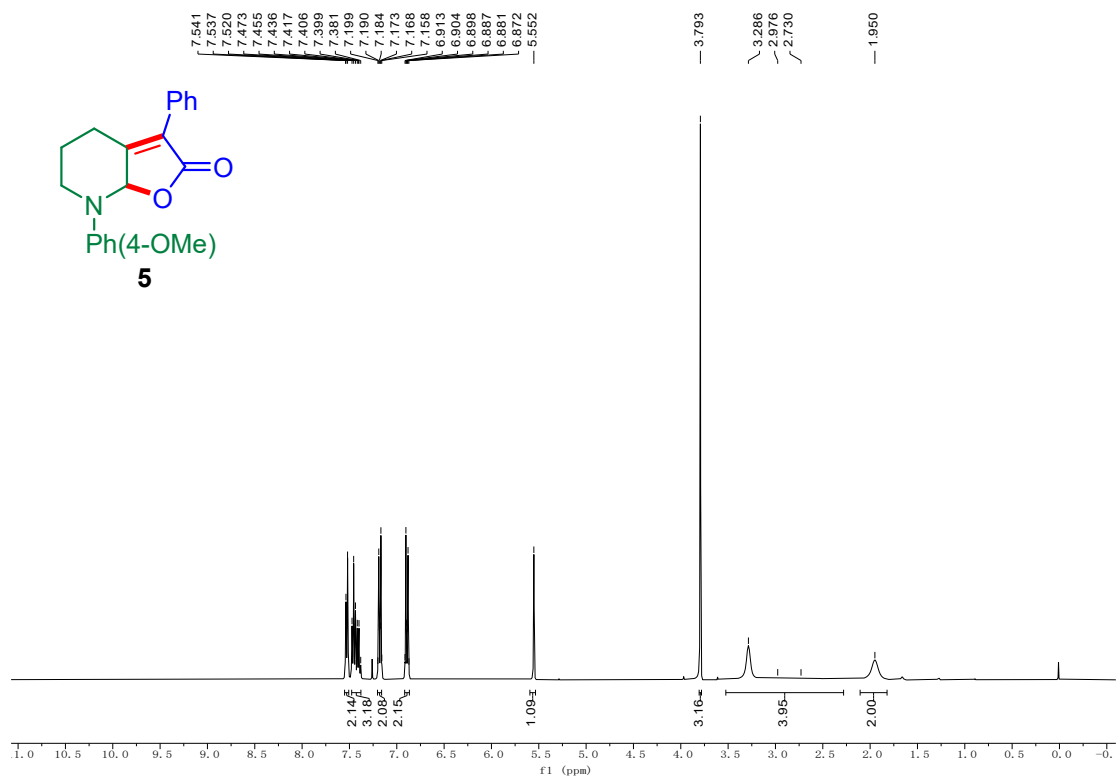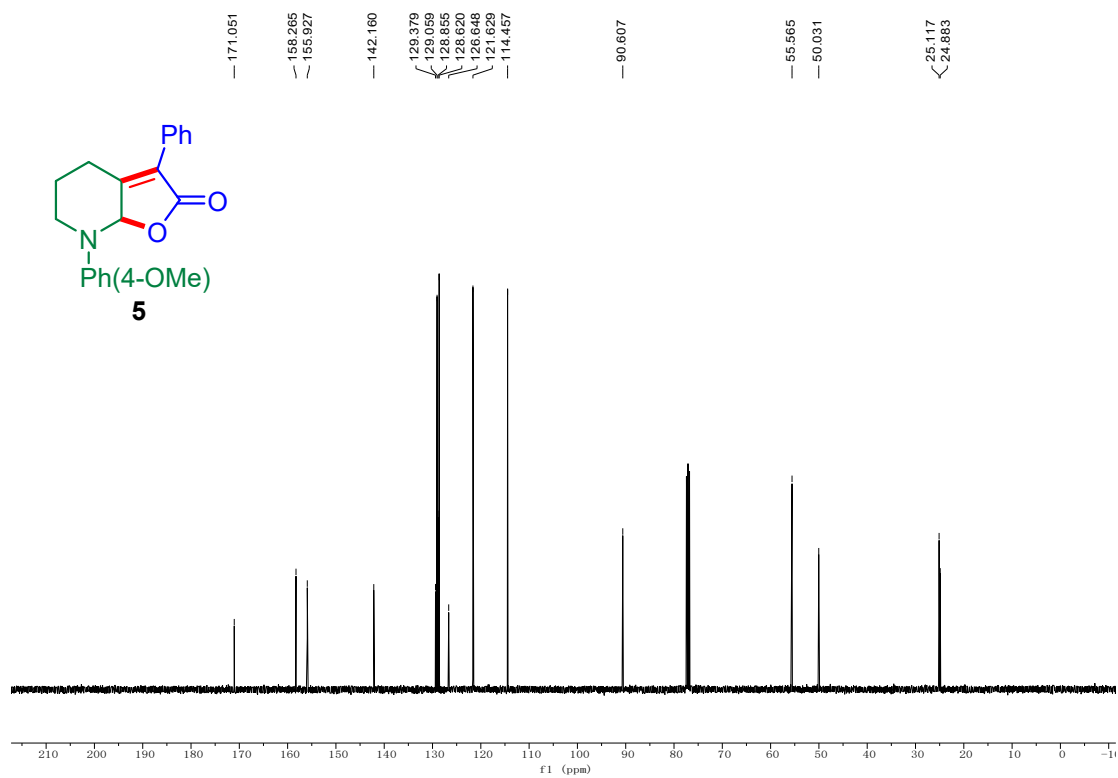

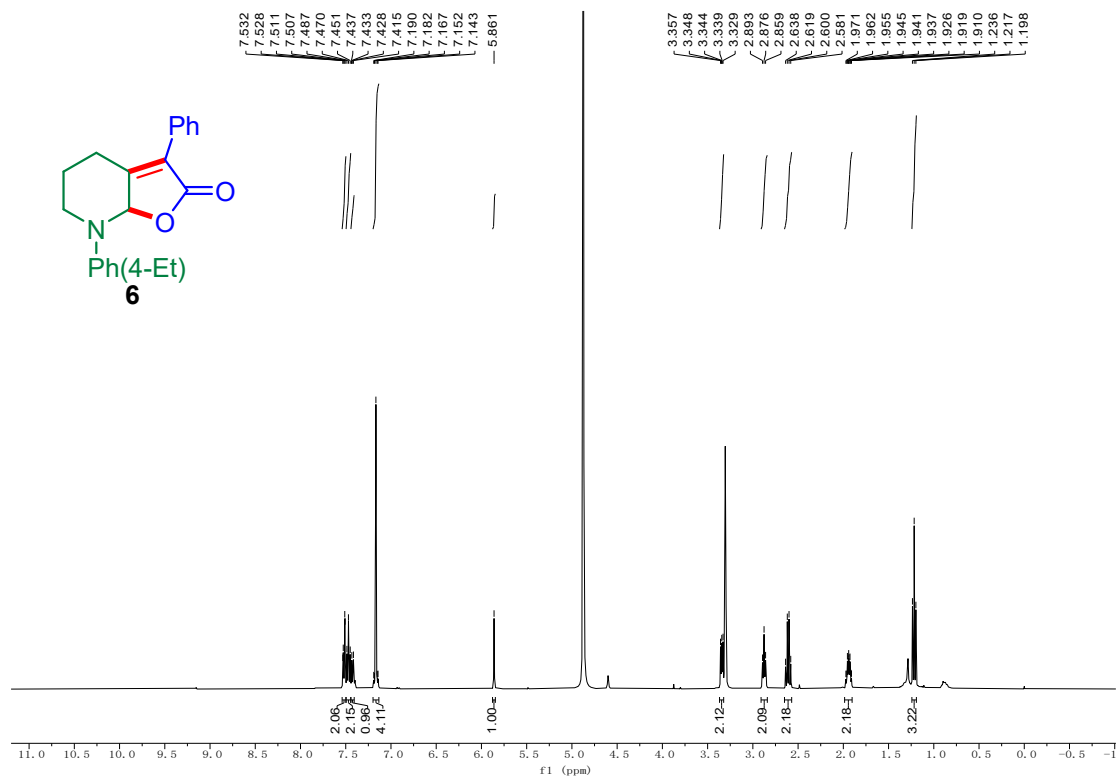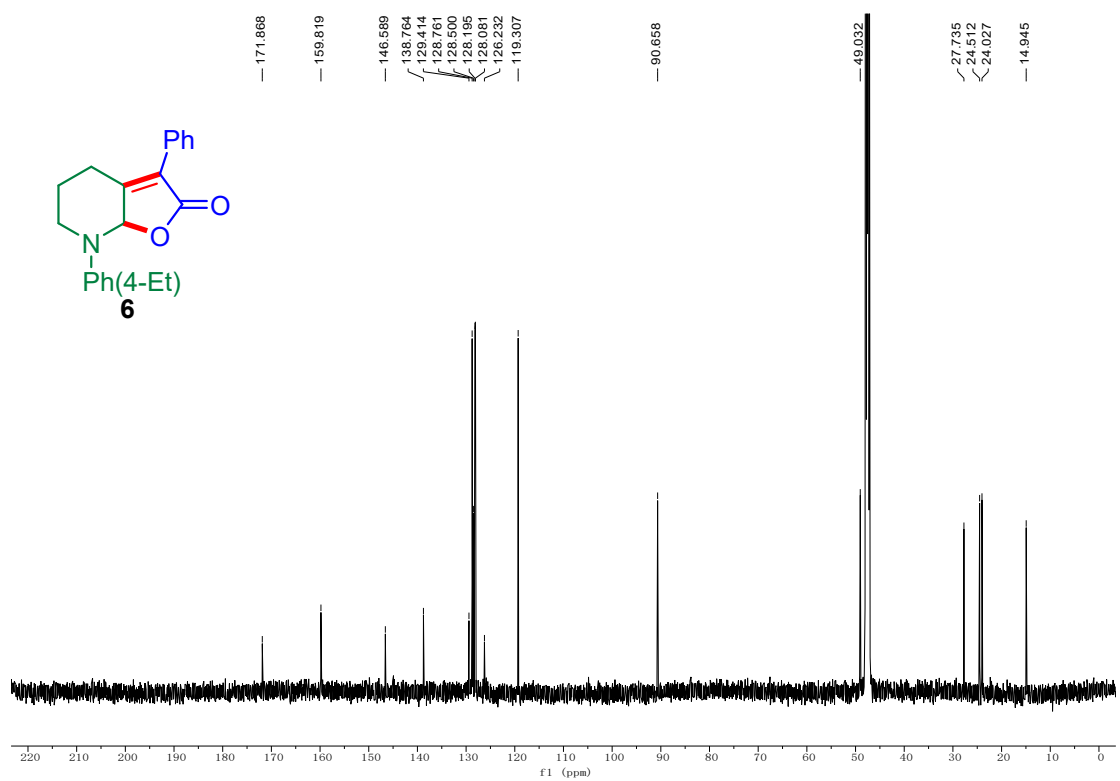

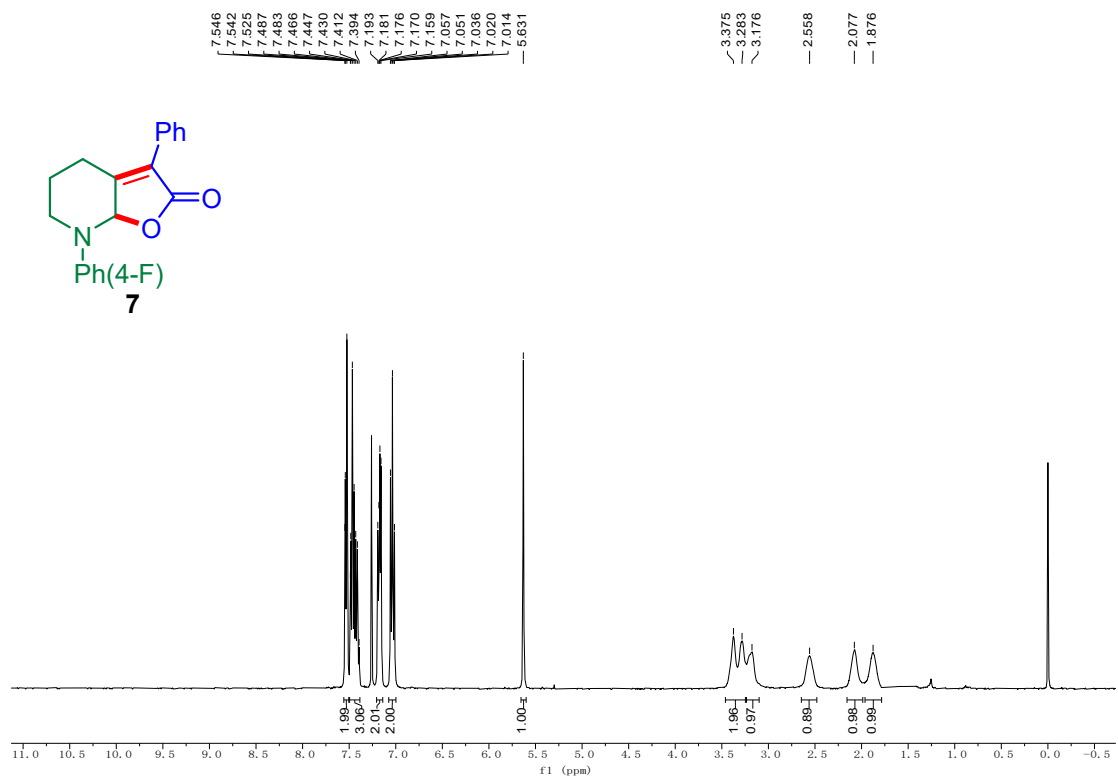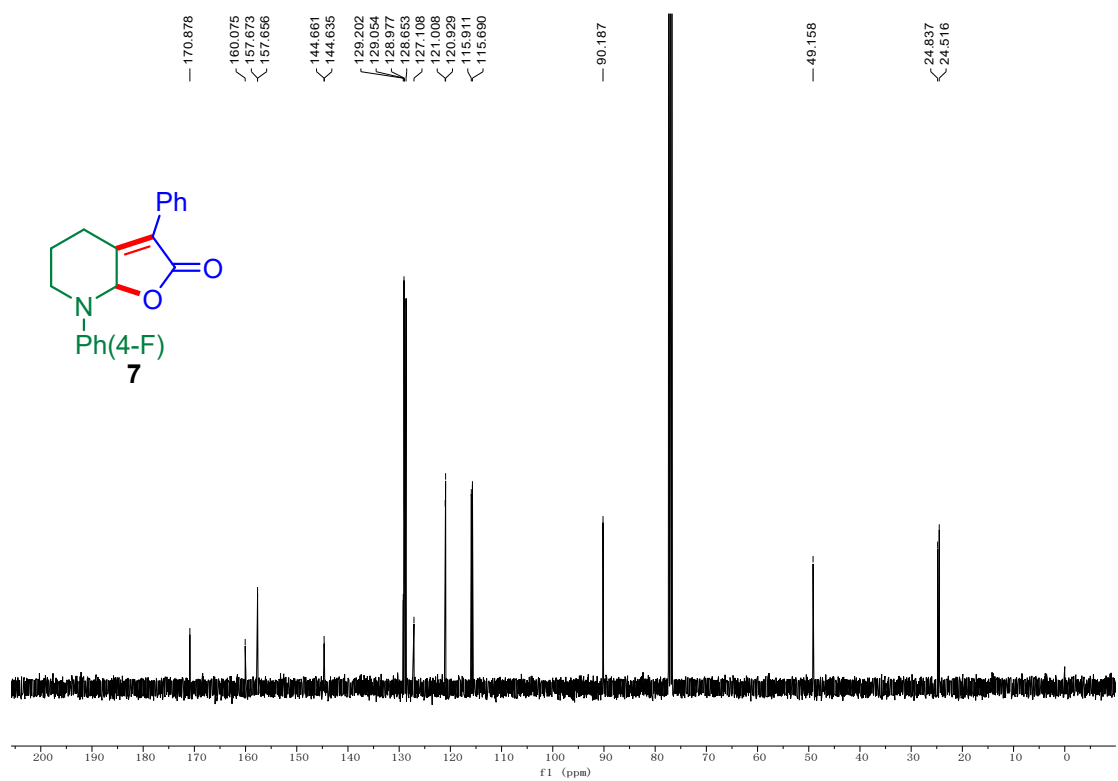

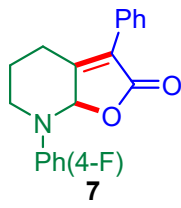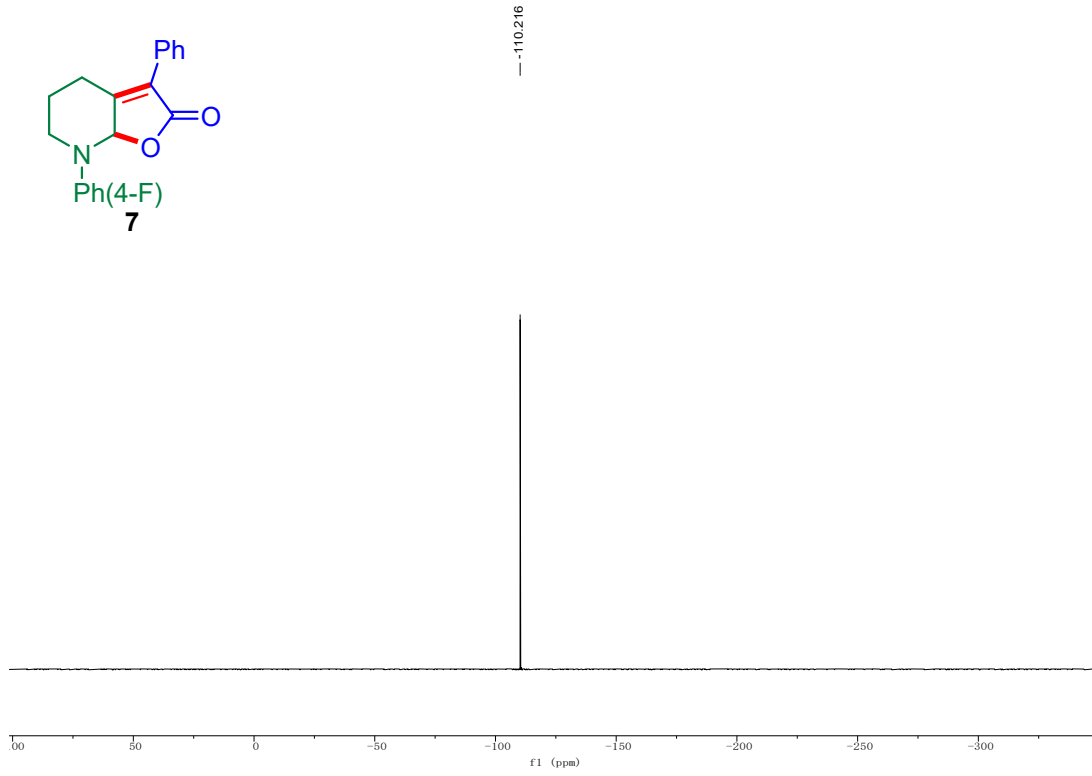

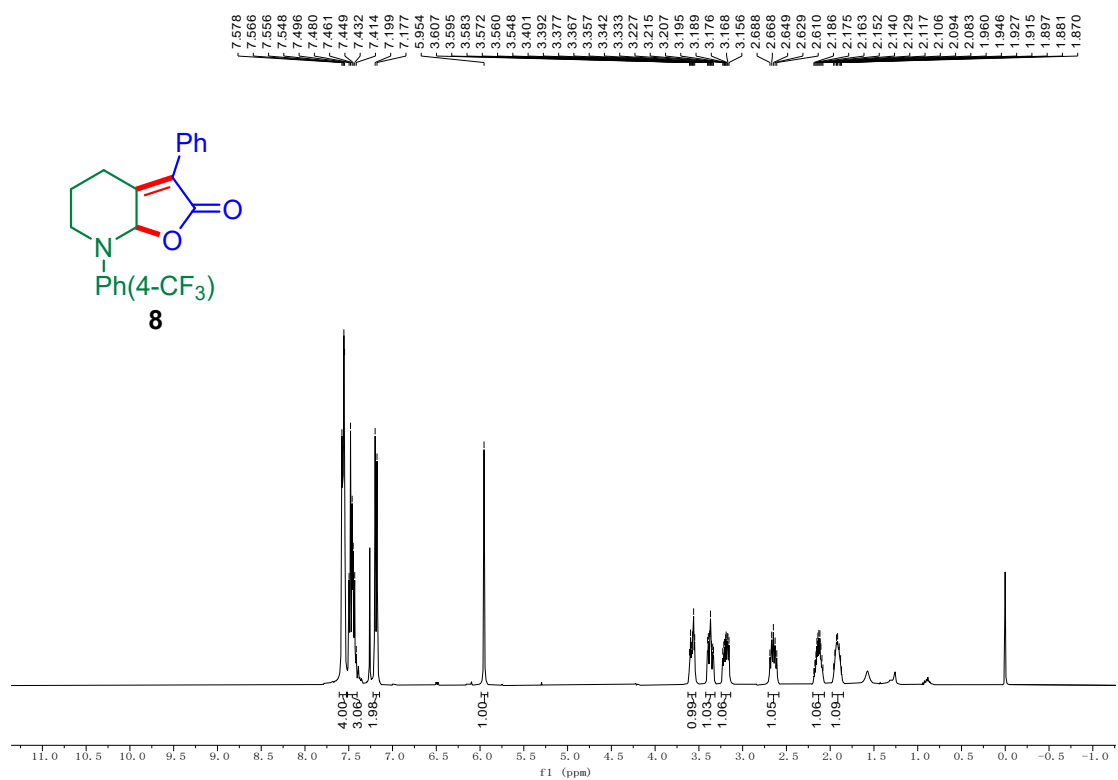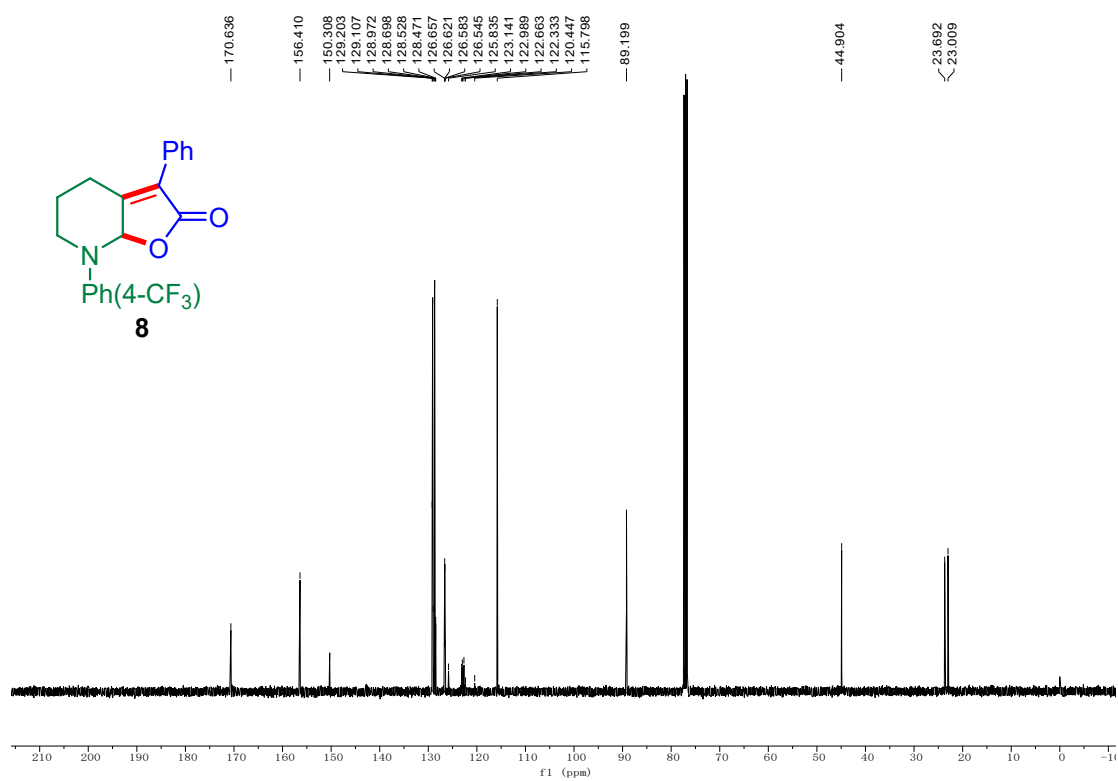

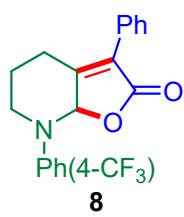

—61.584

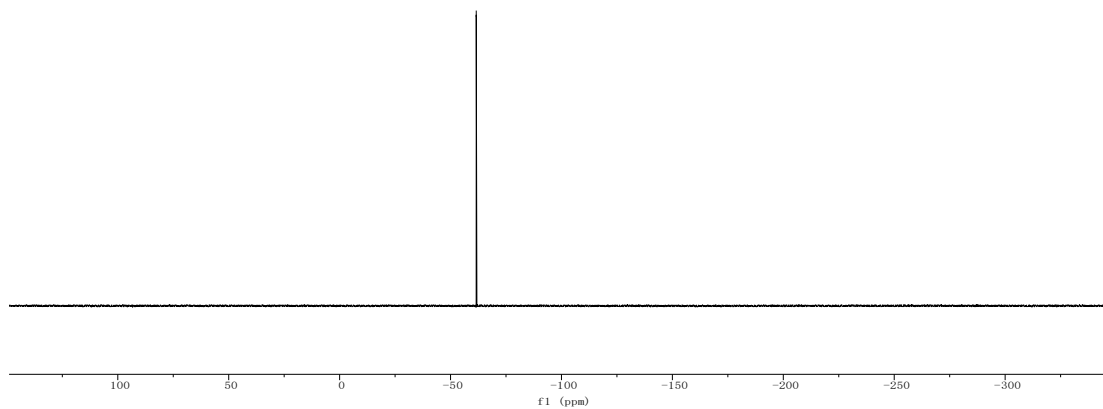

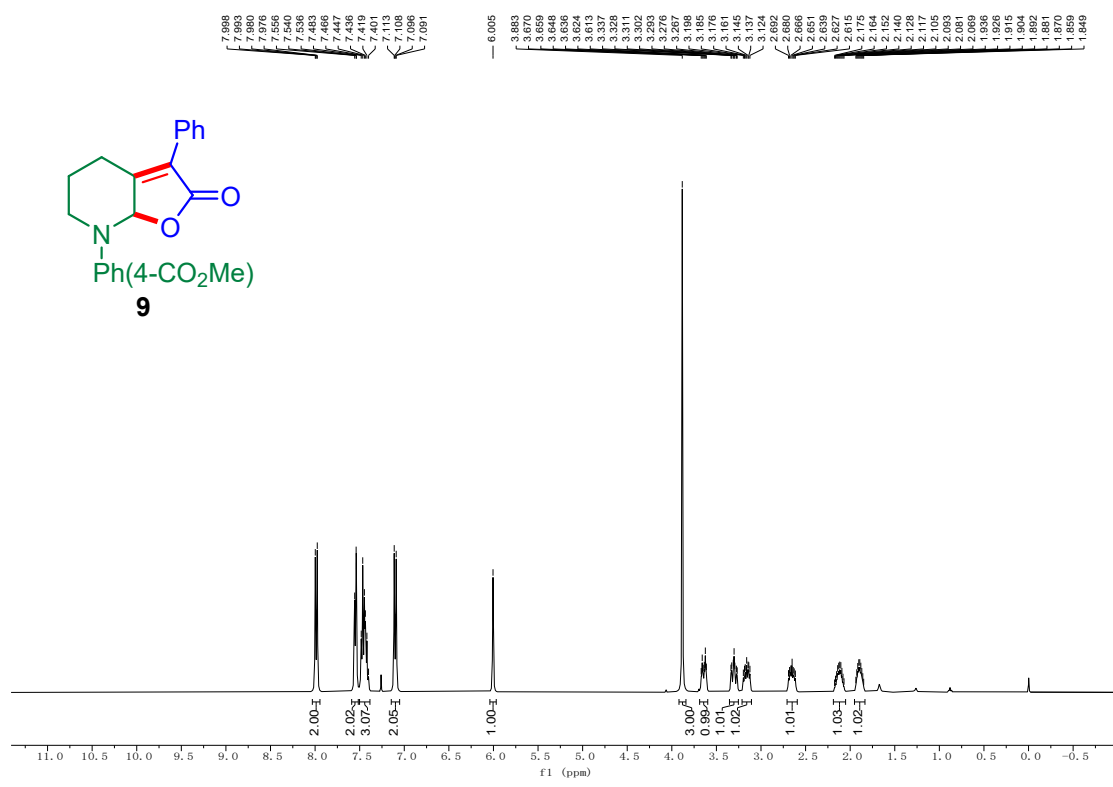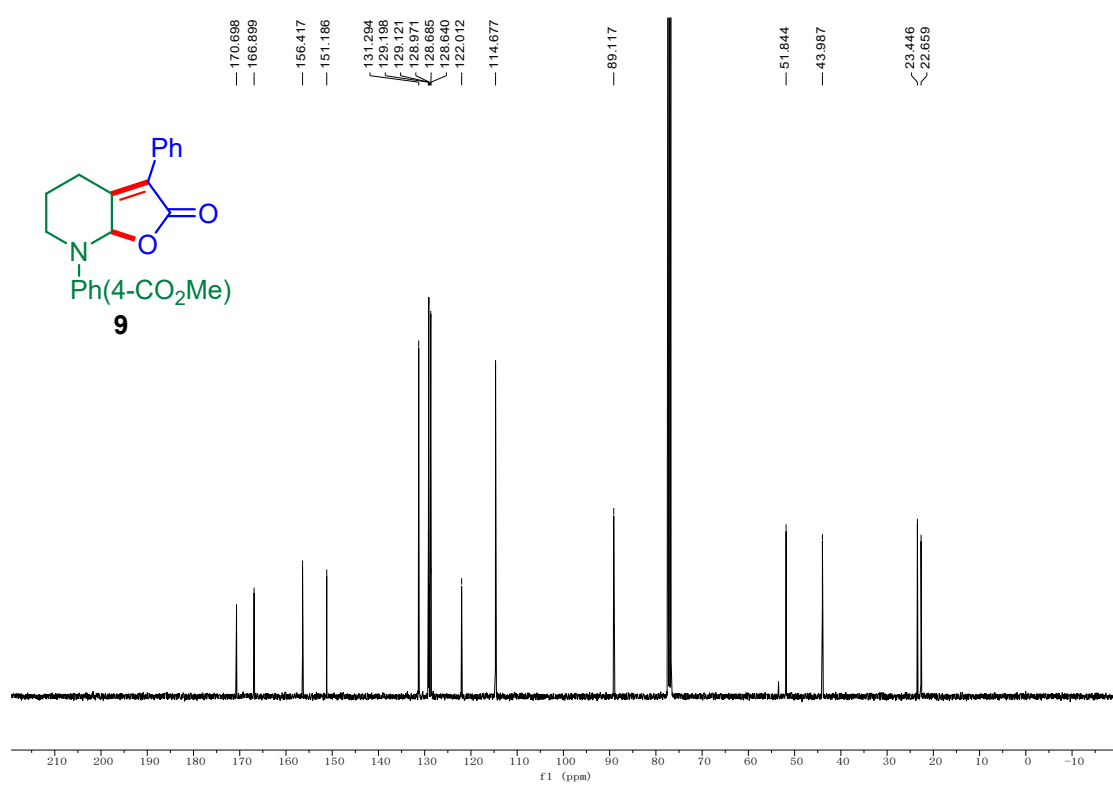

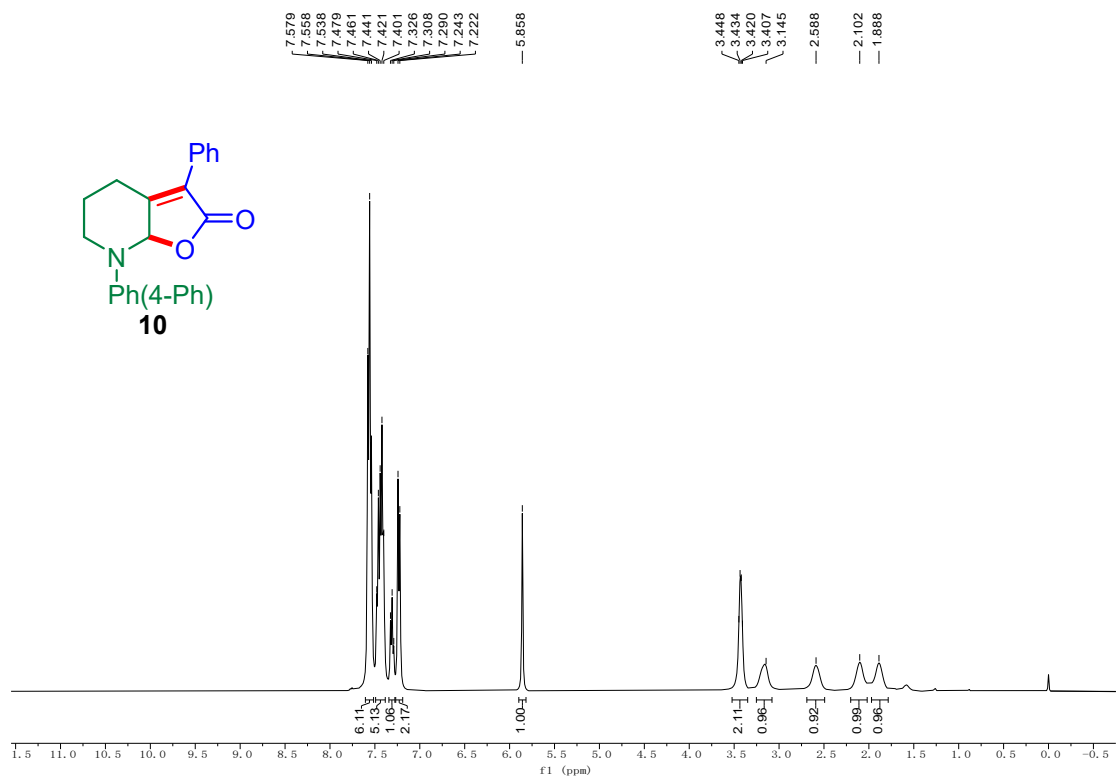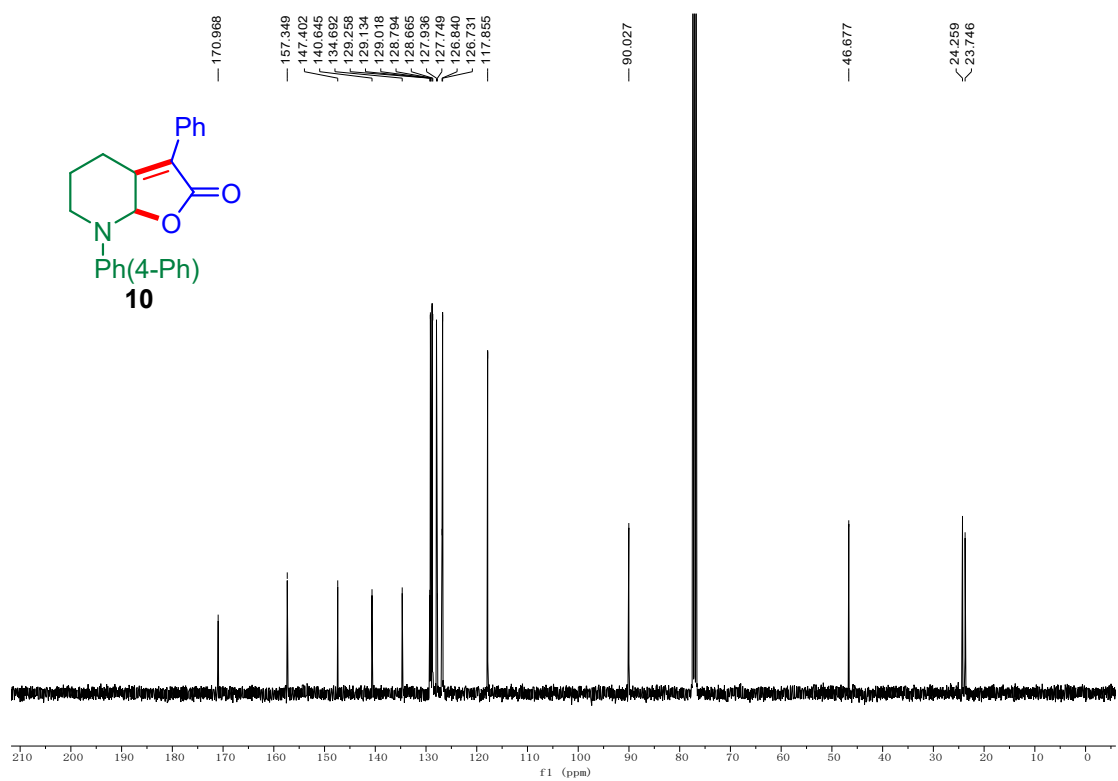



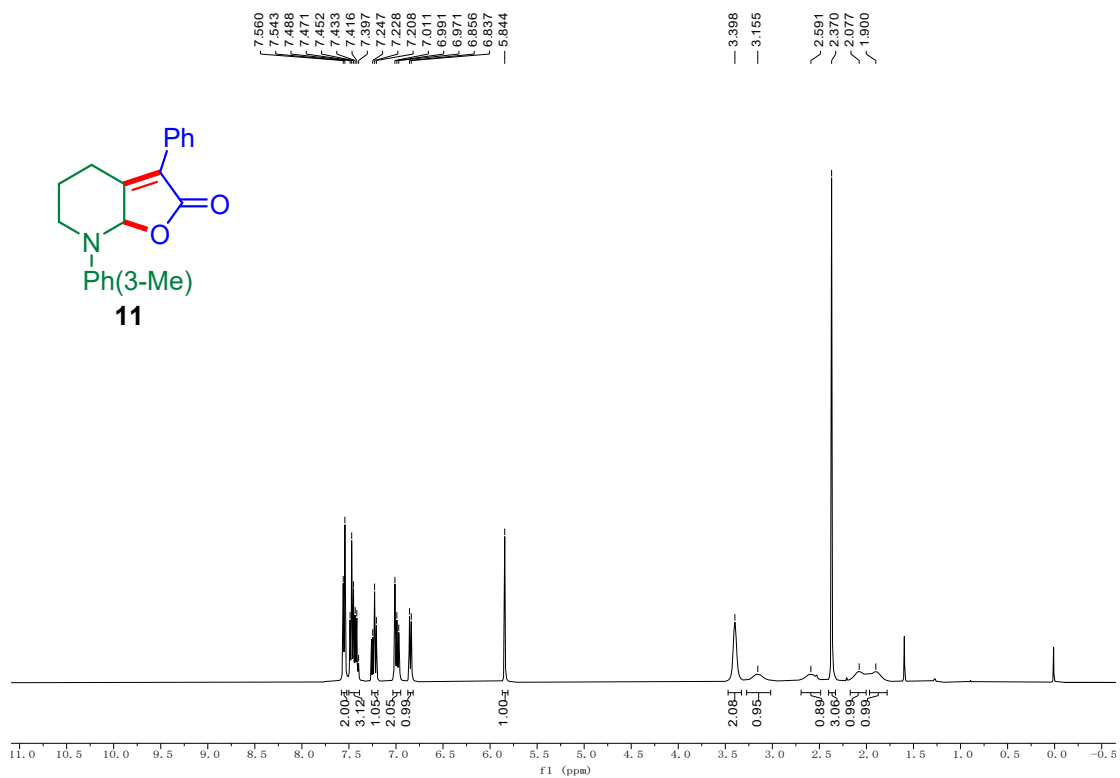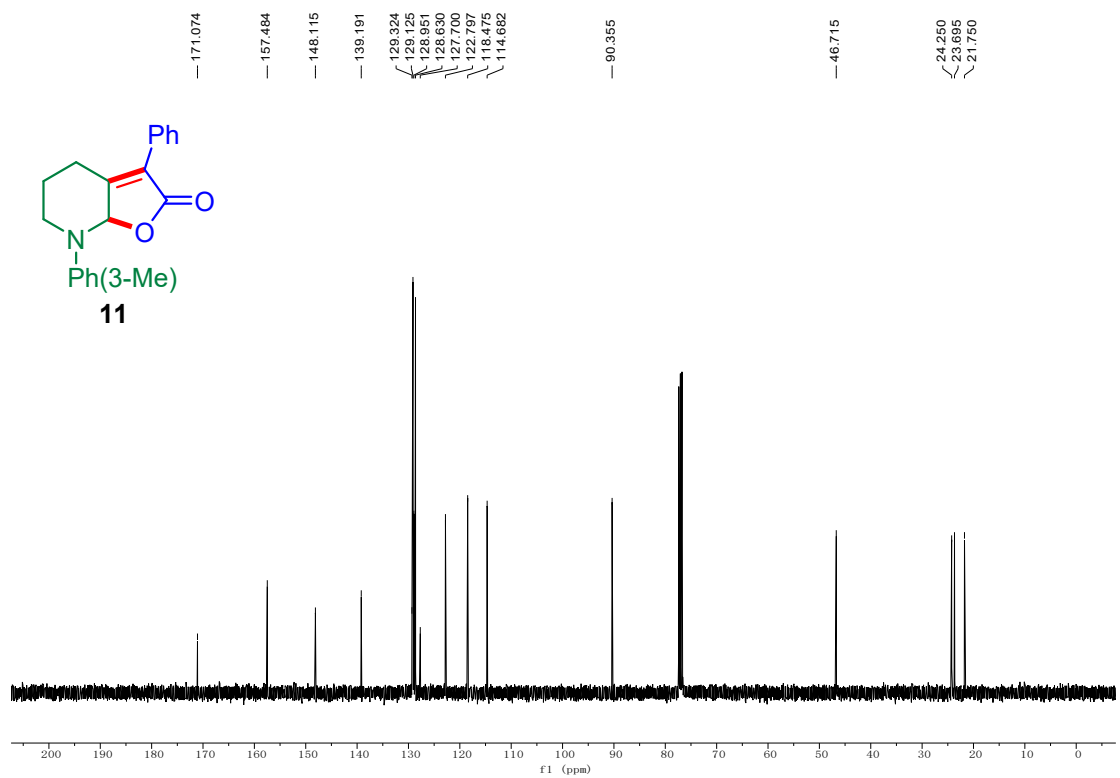

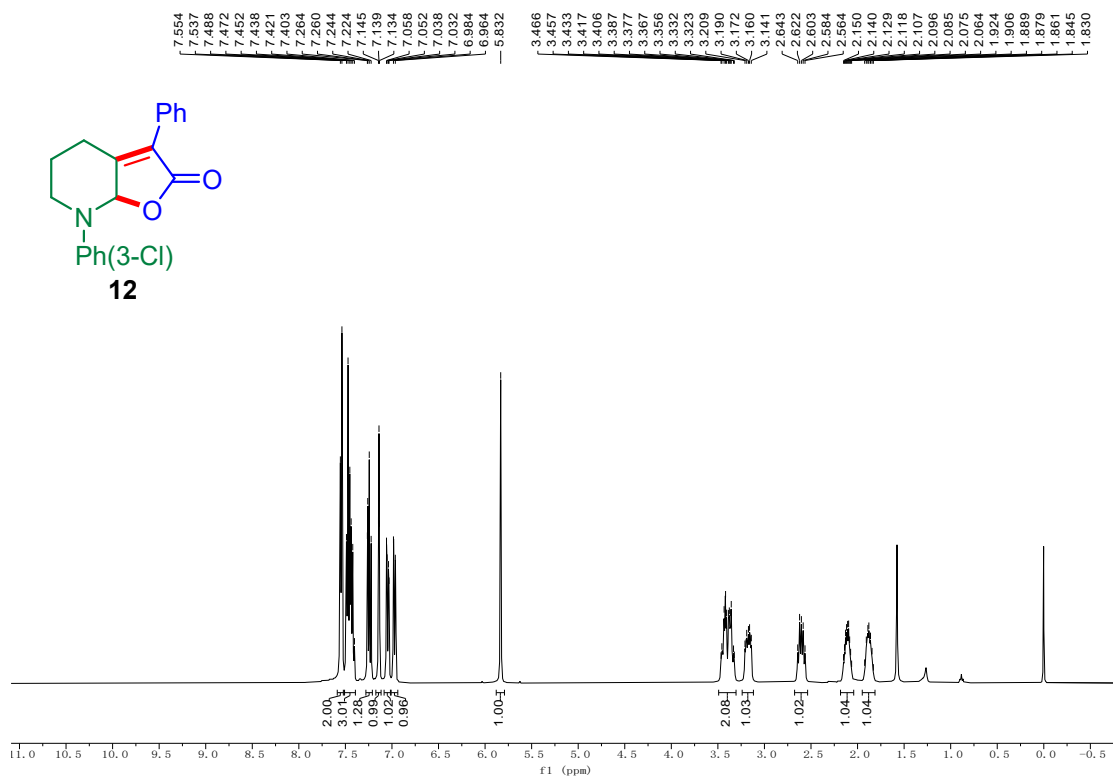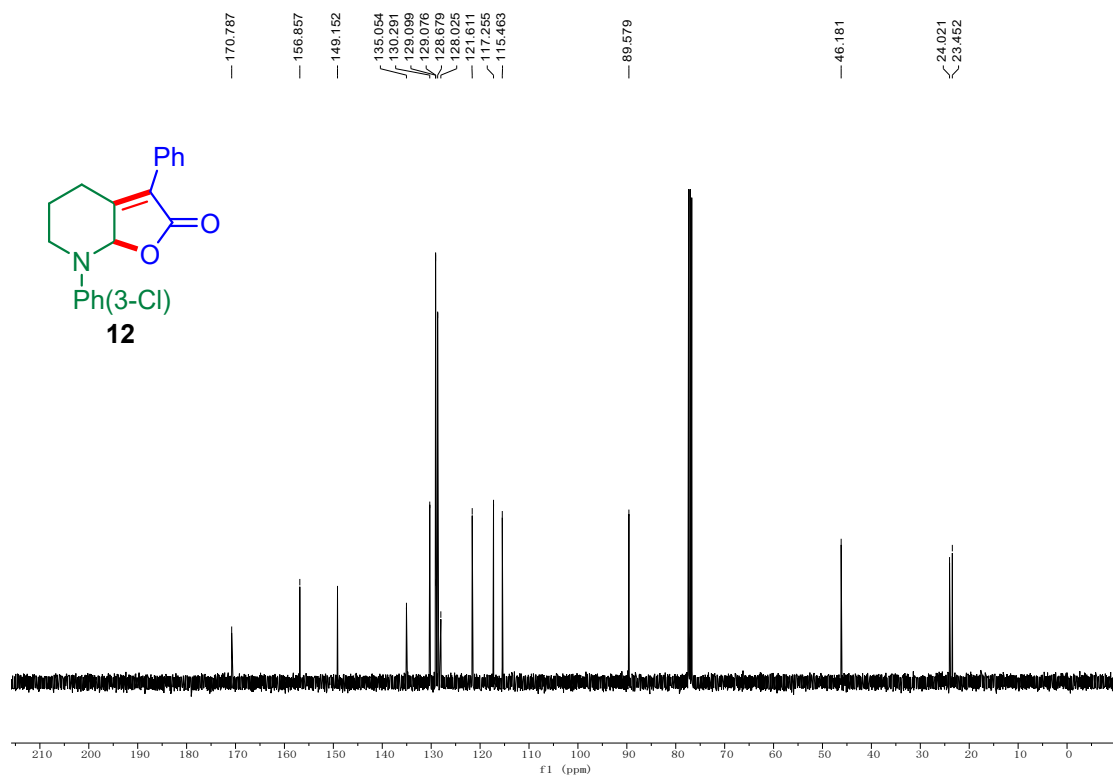

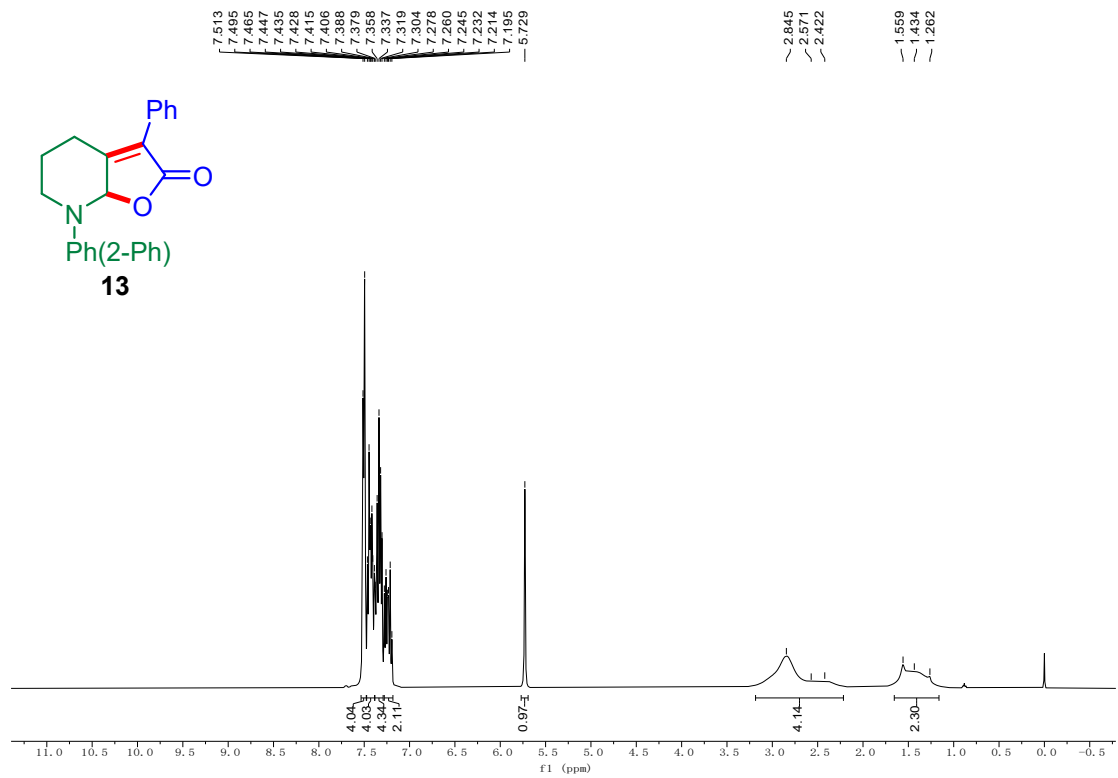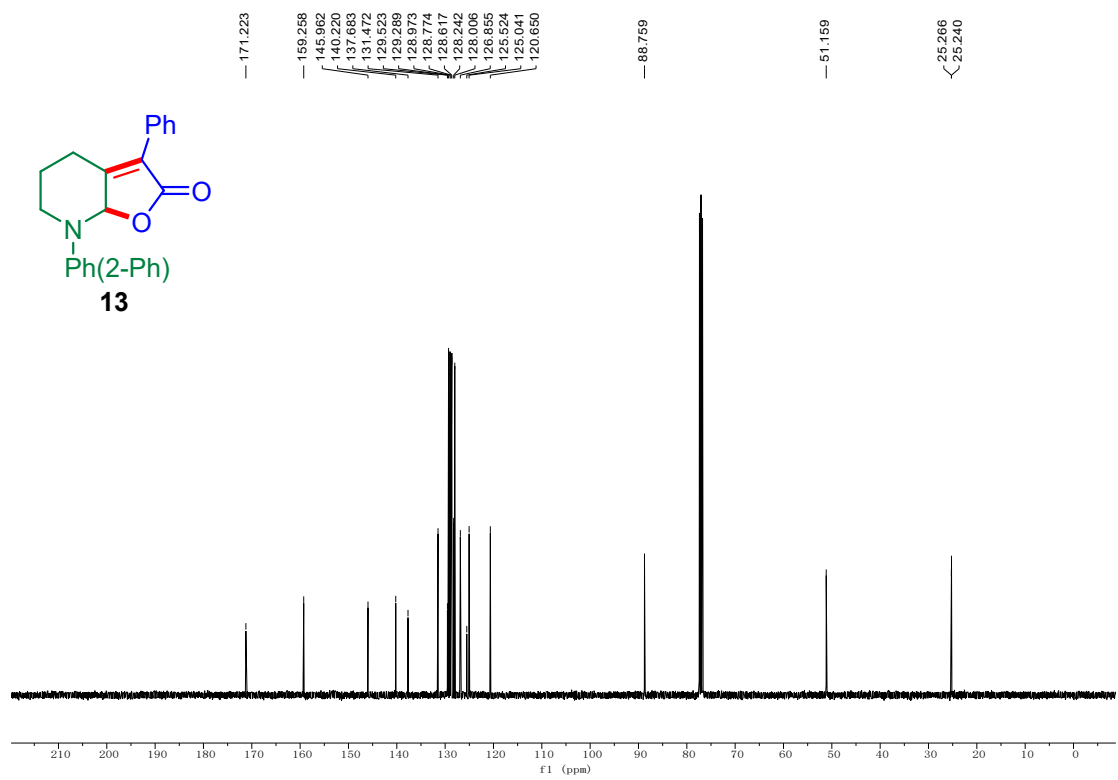

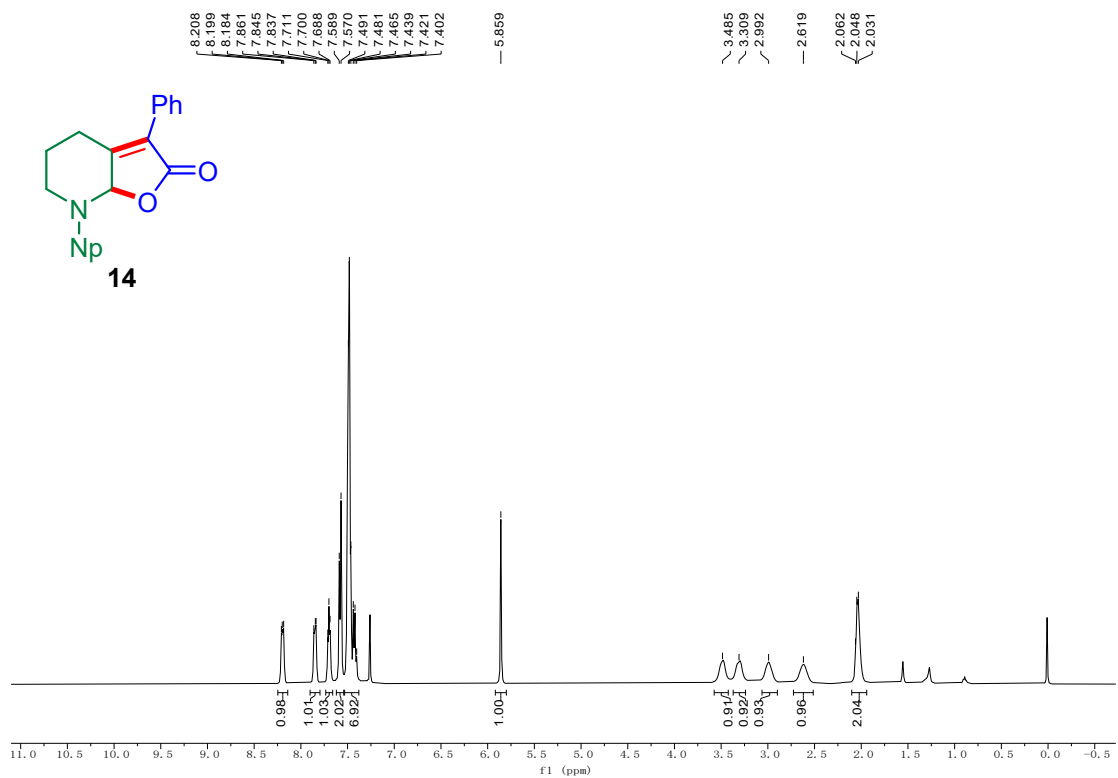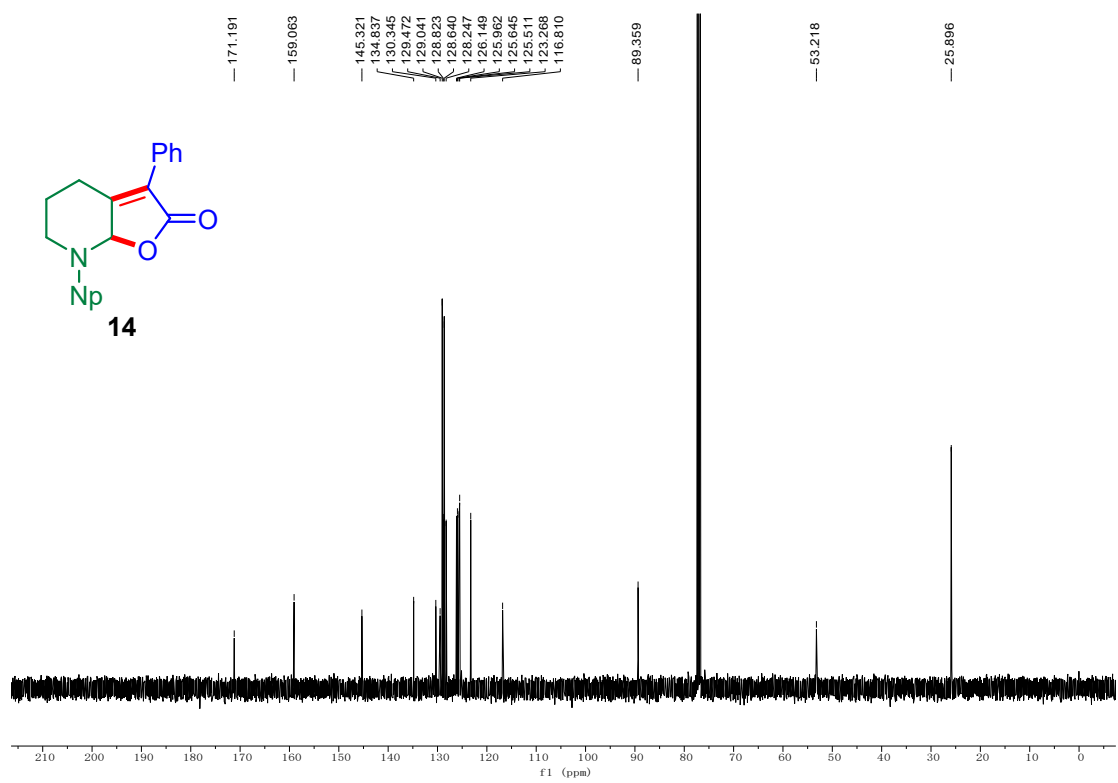

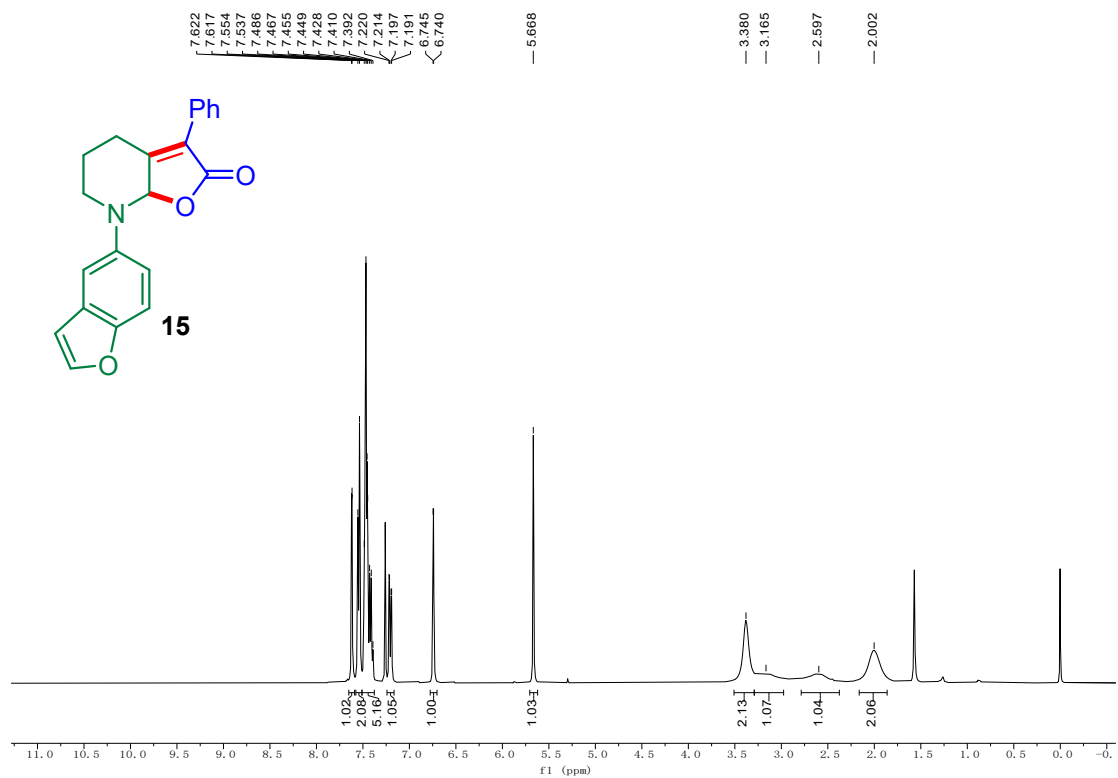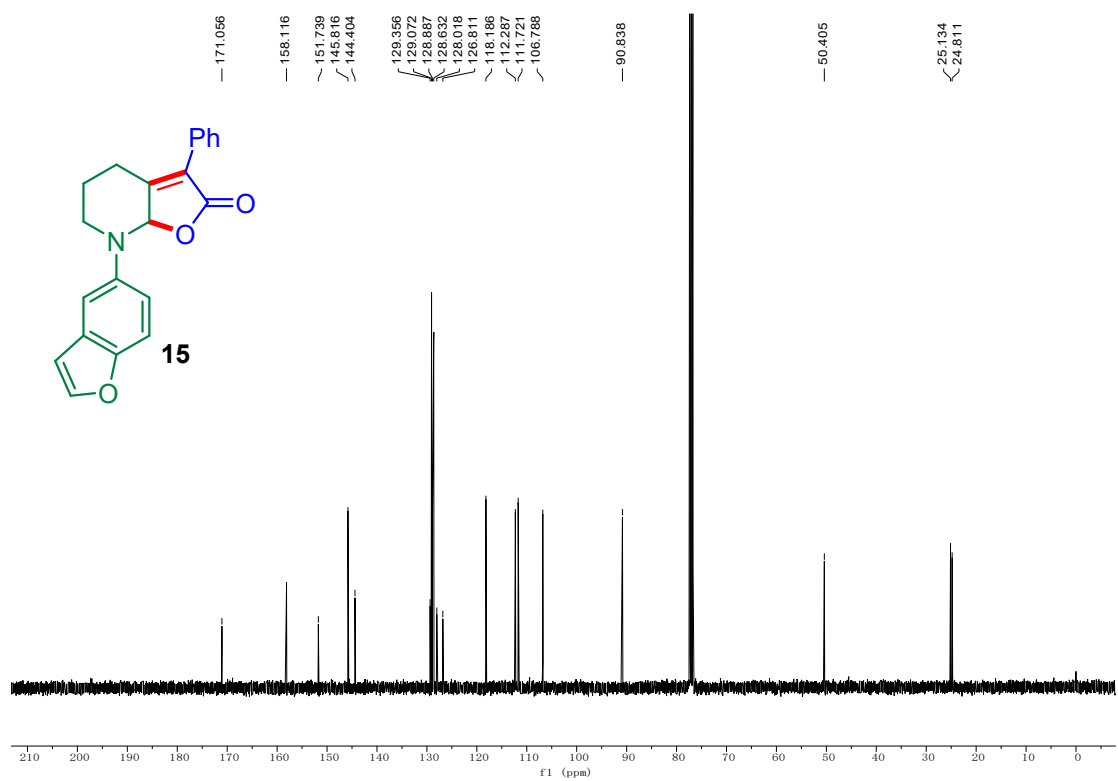

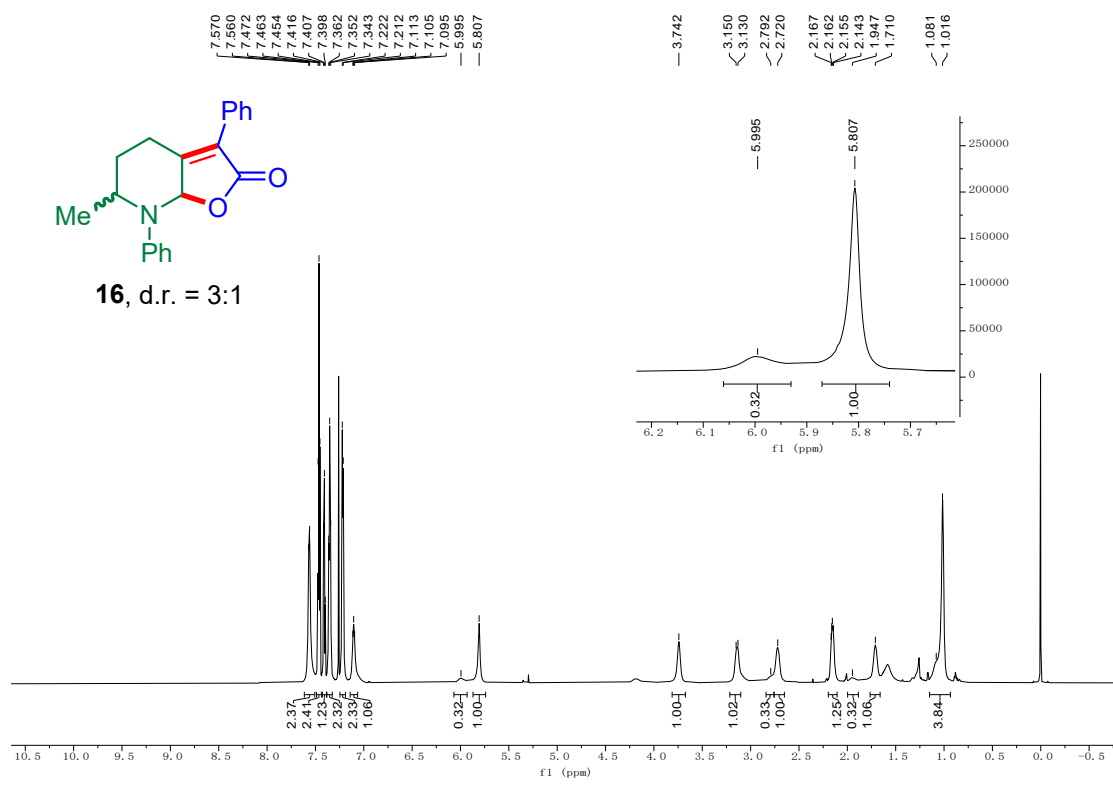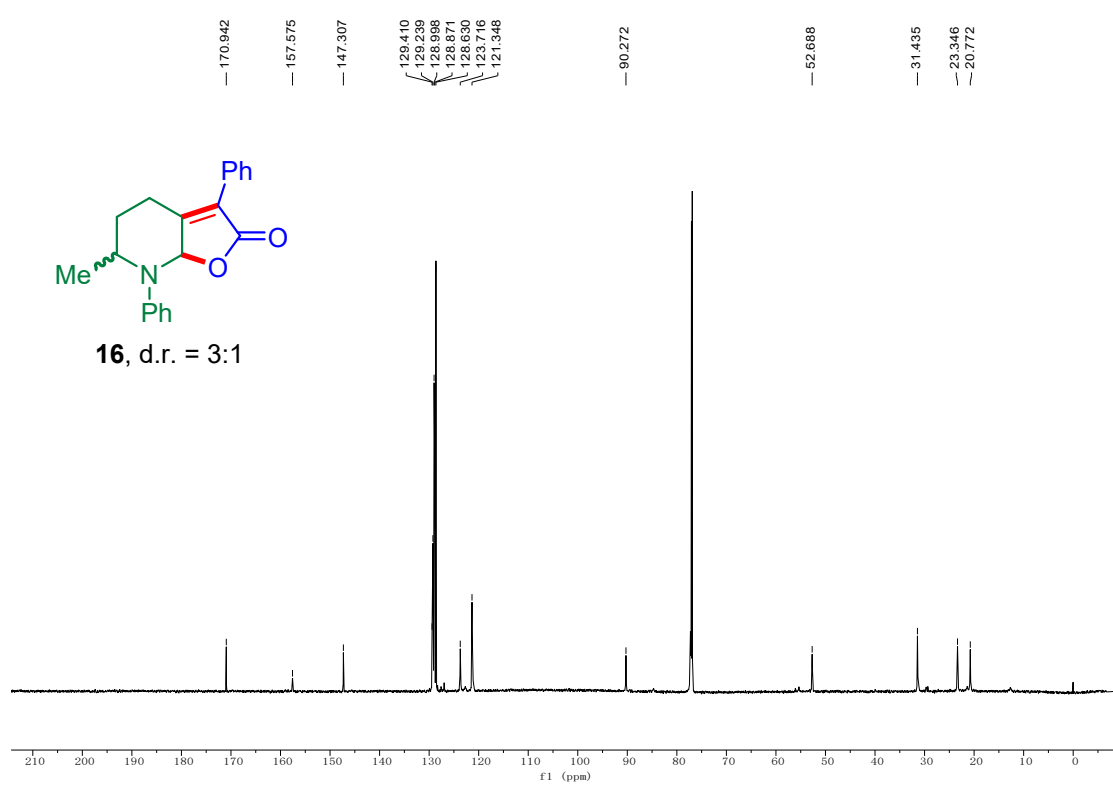

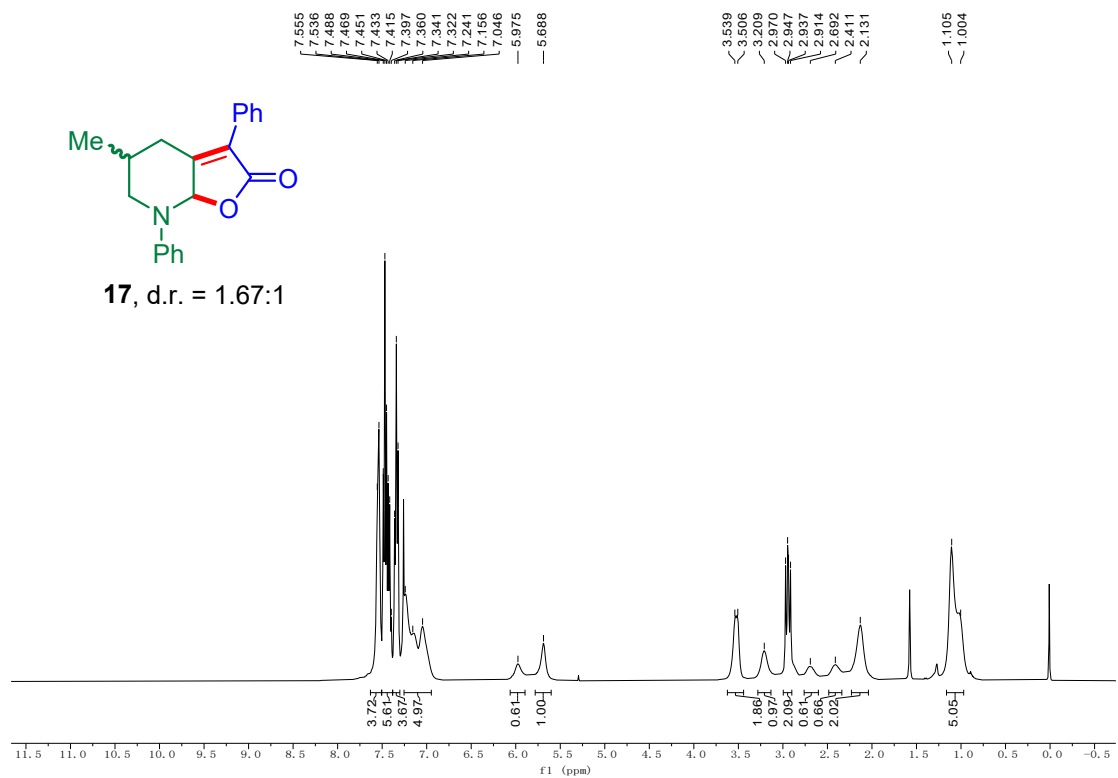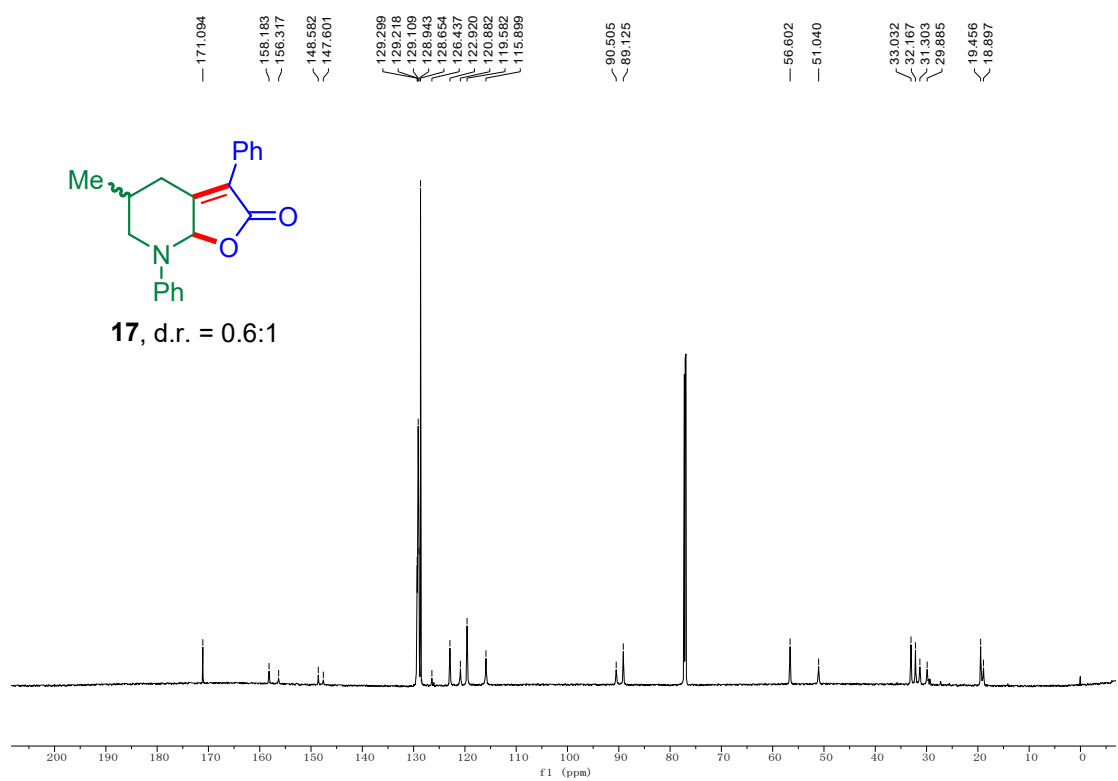

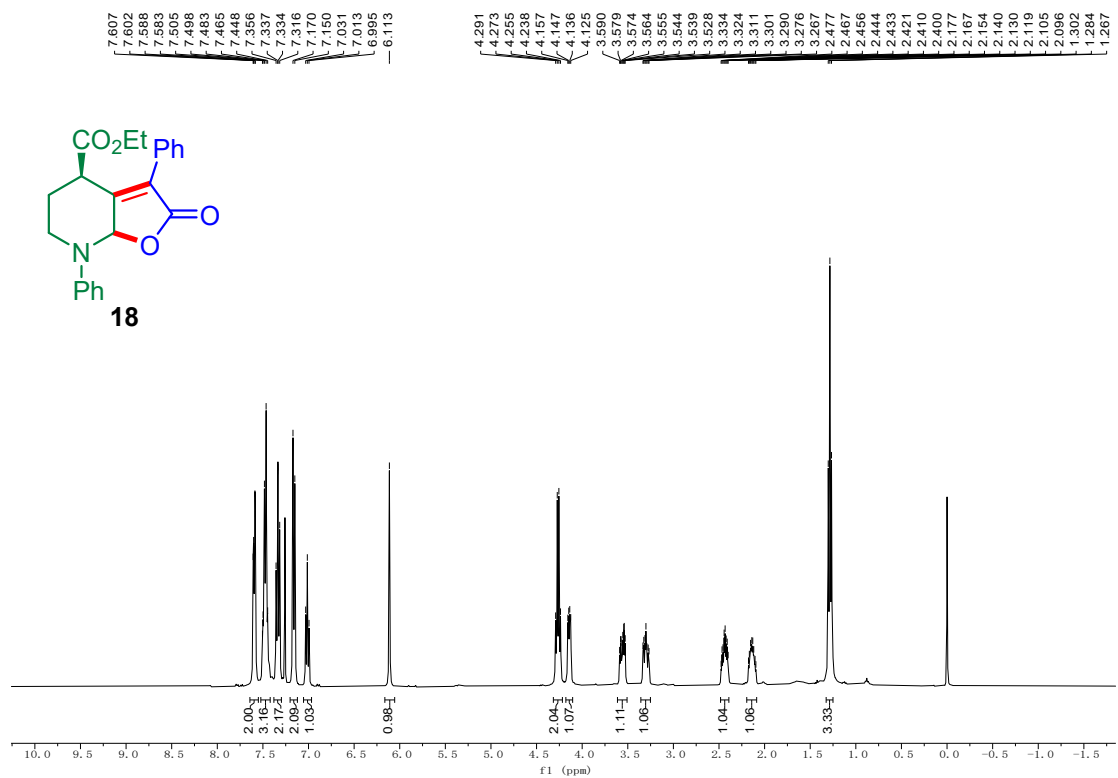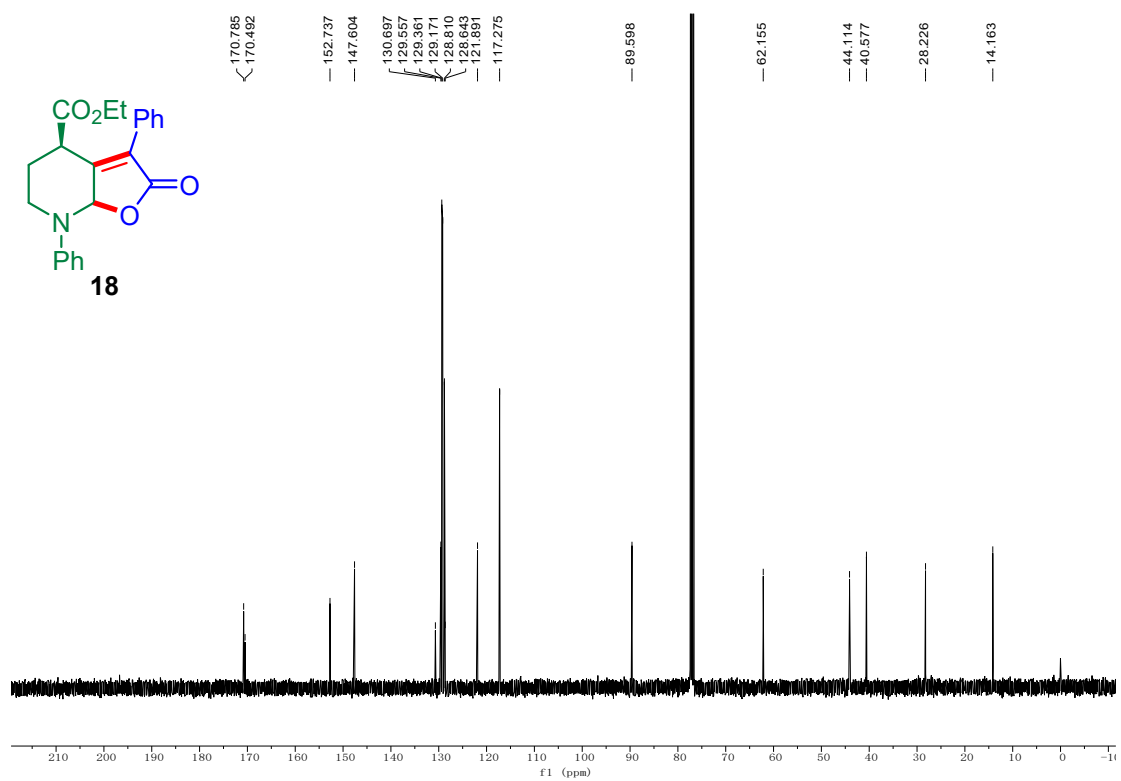



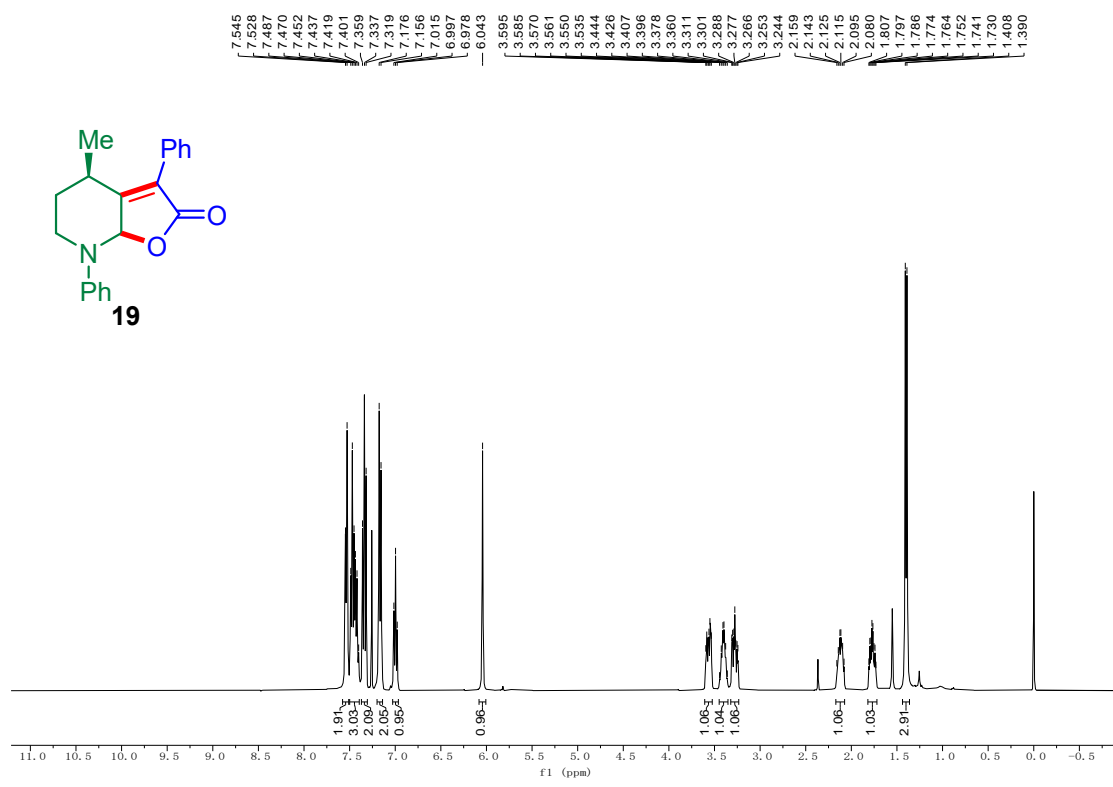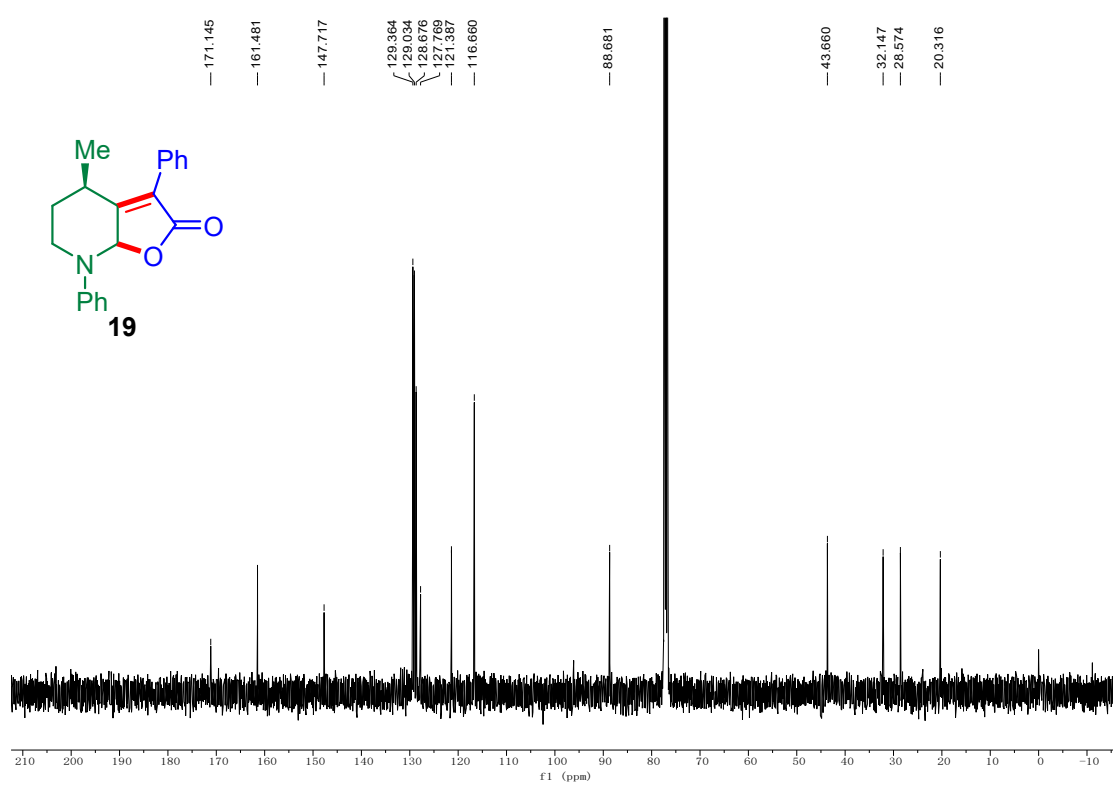



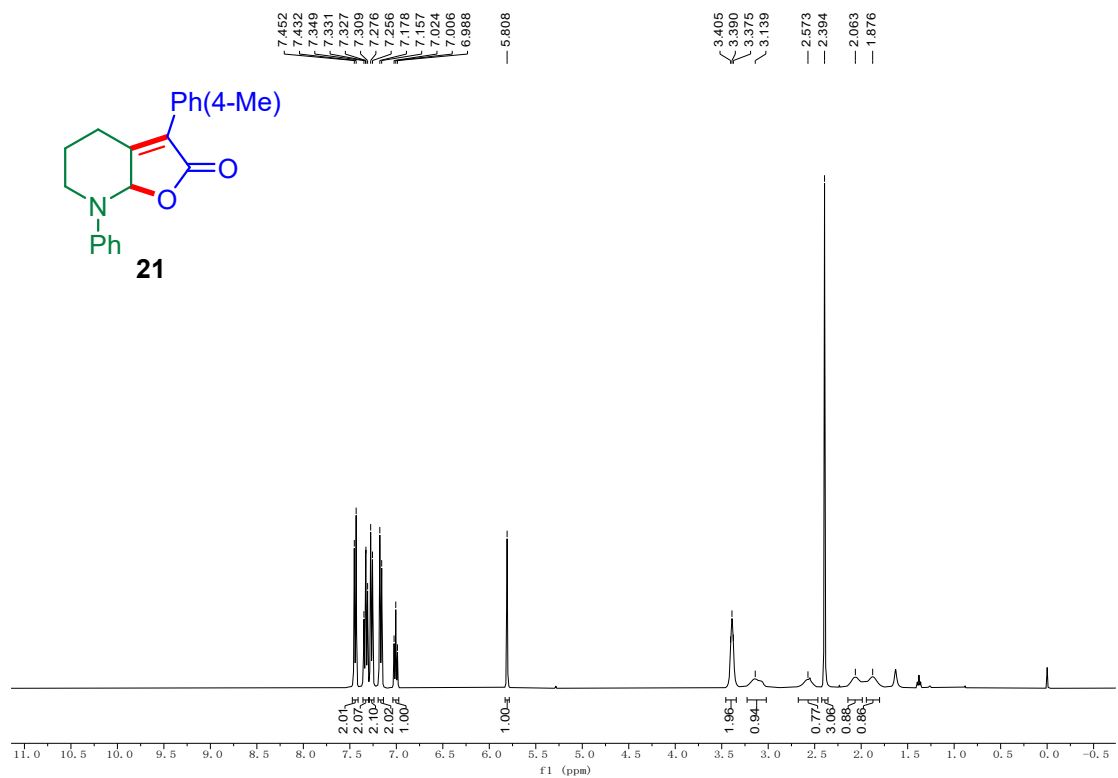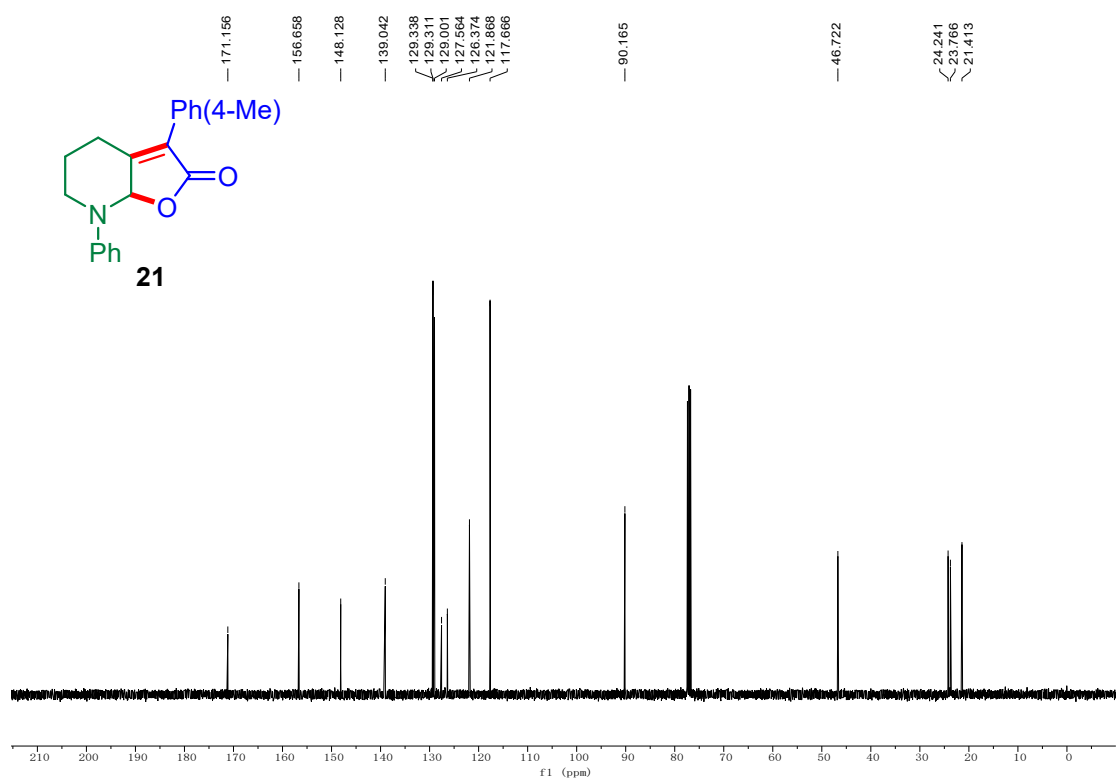

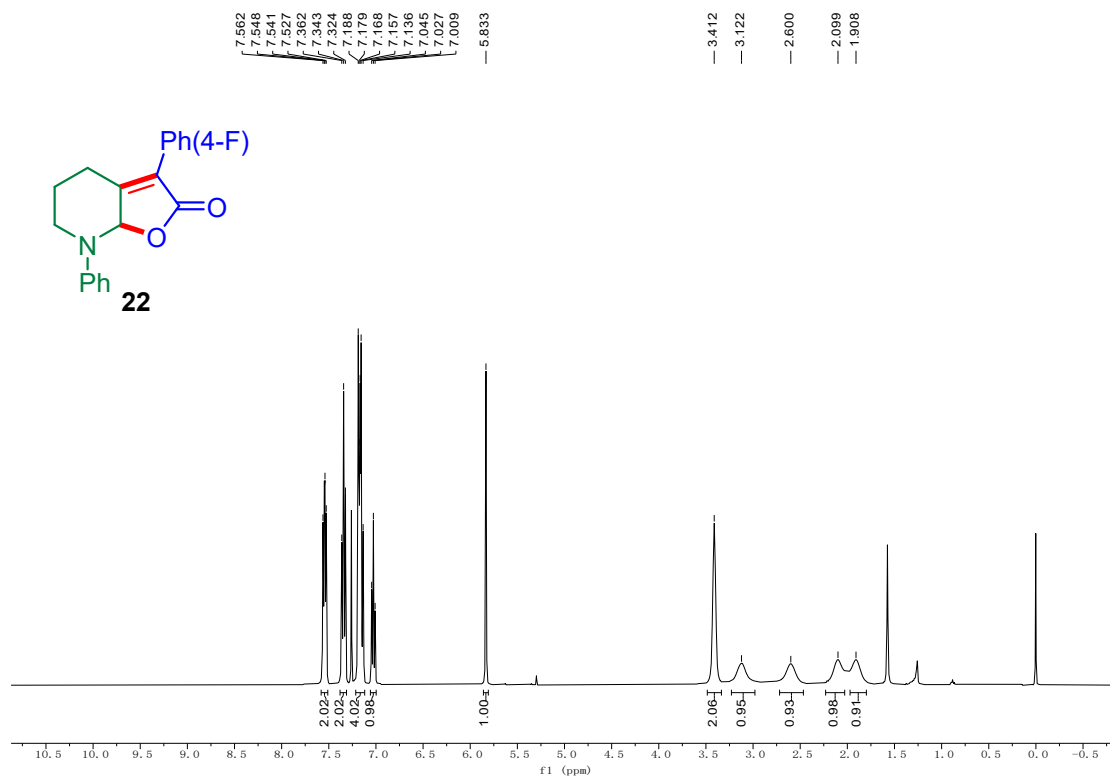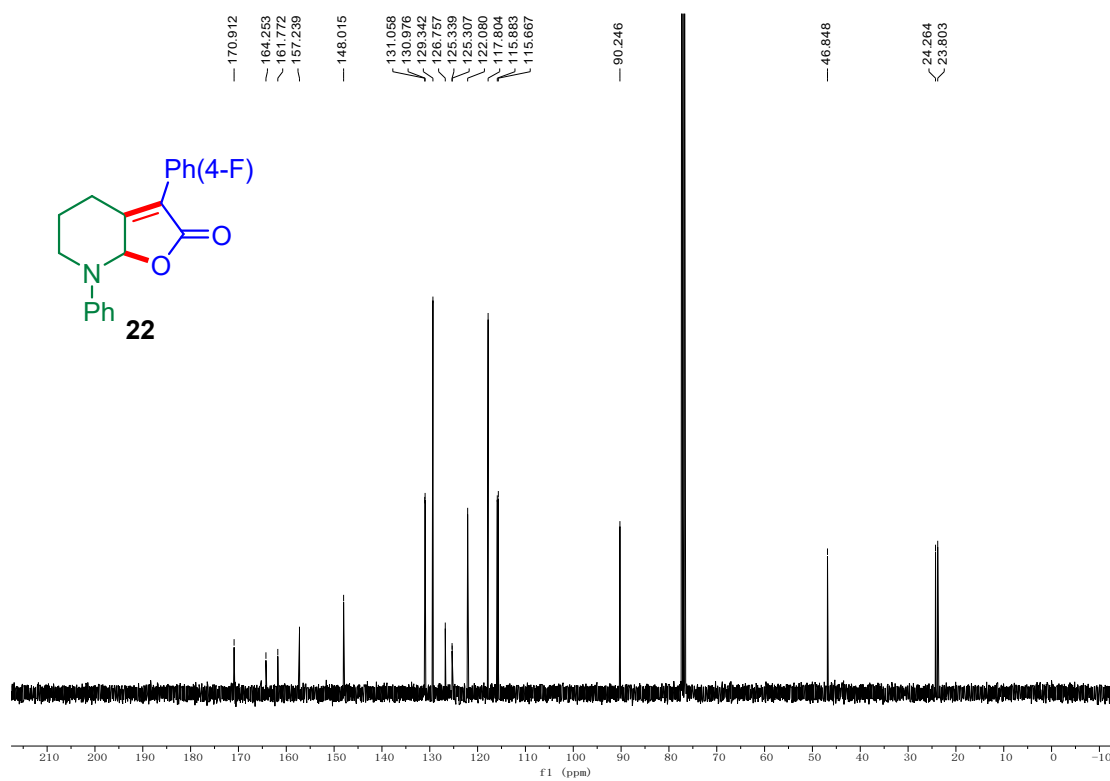

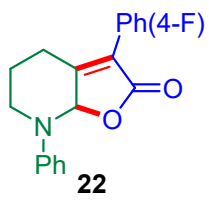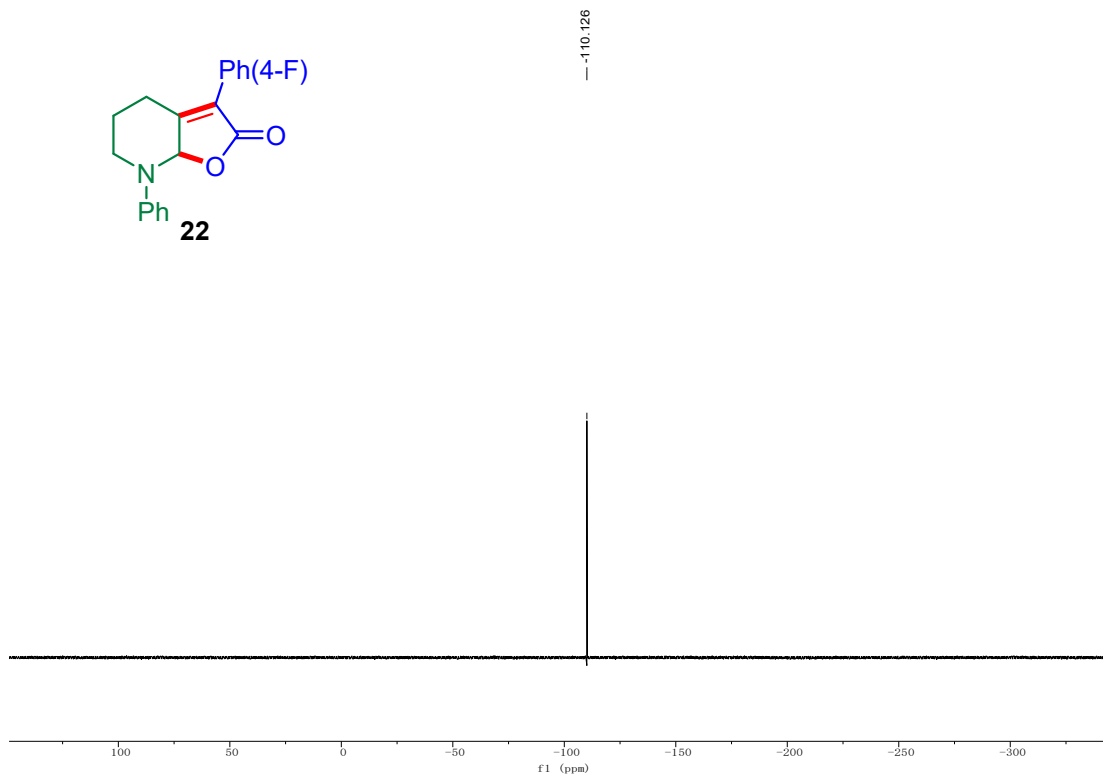

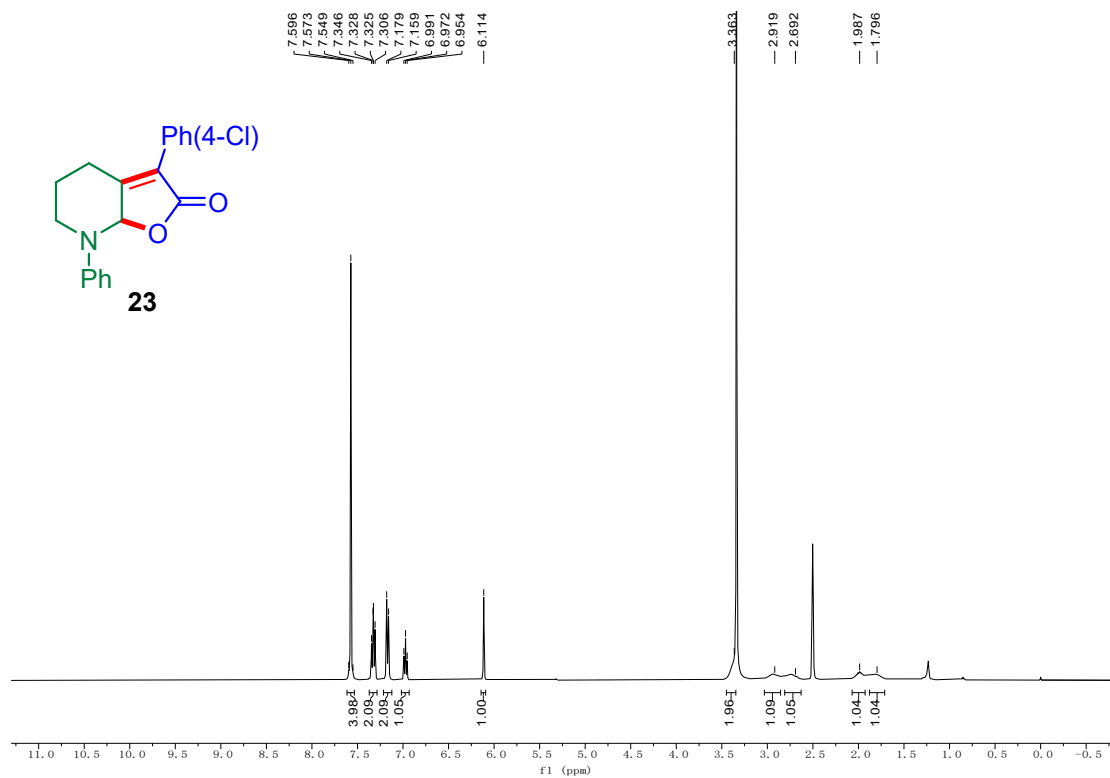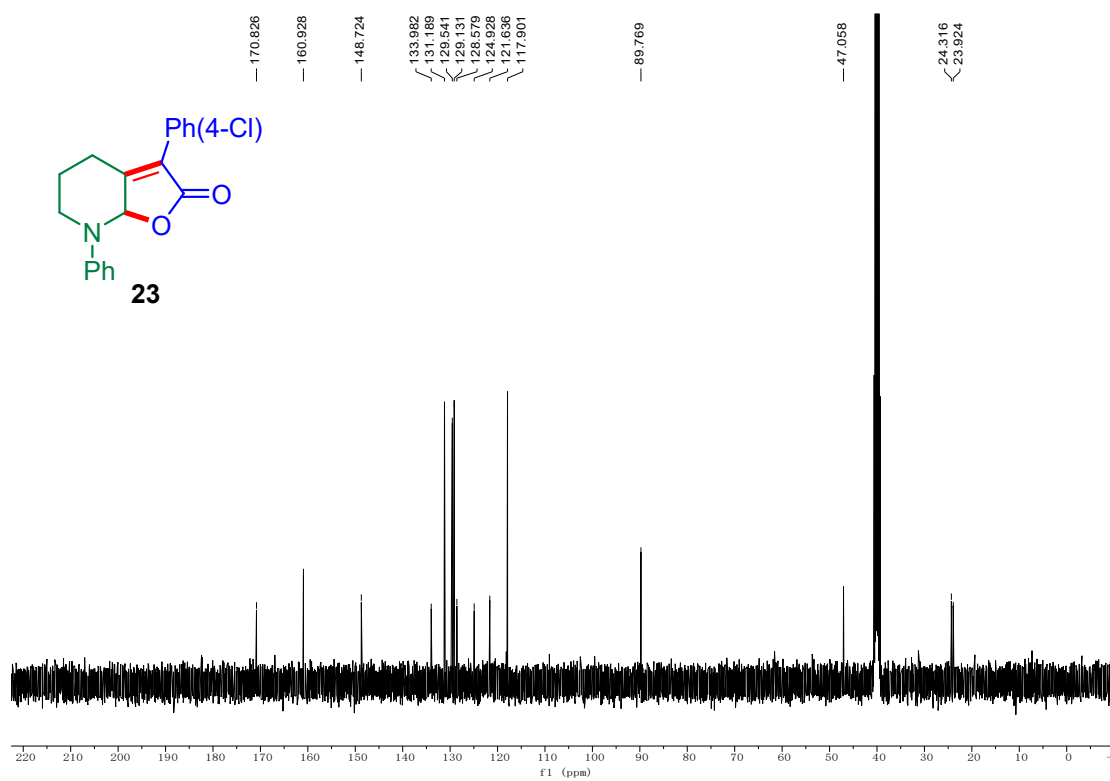

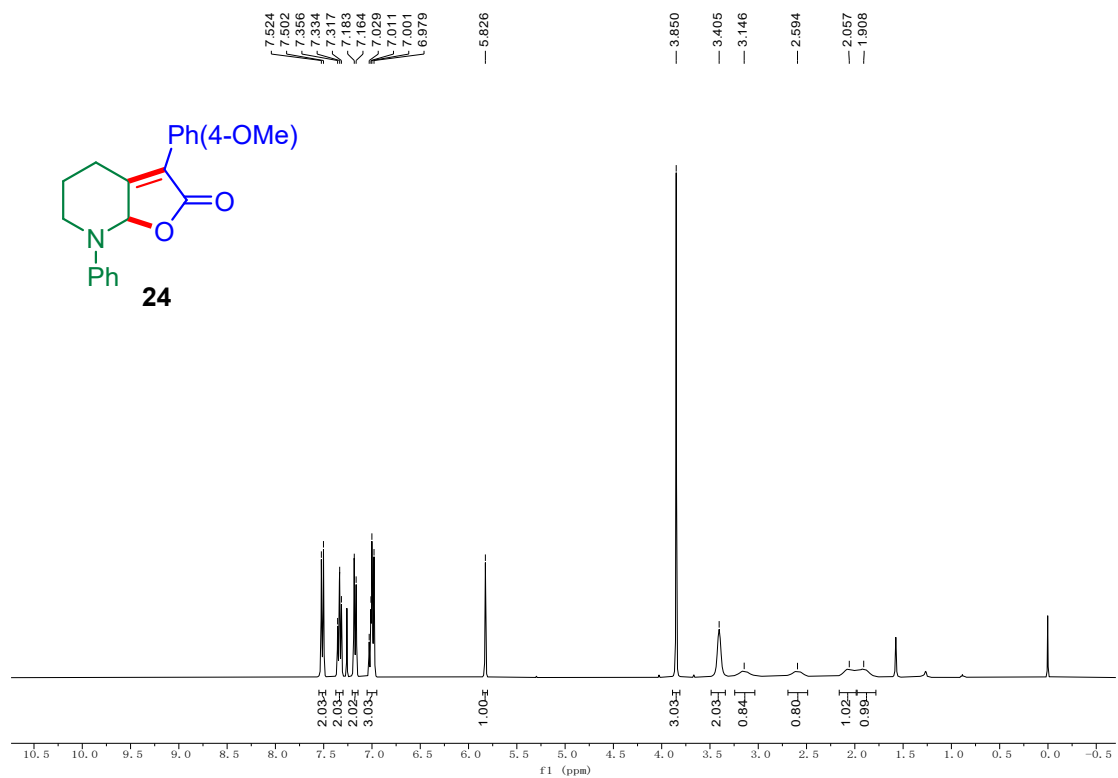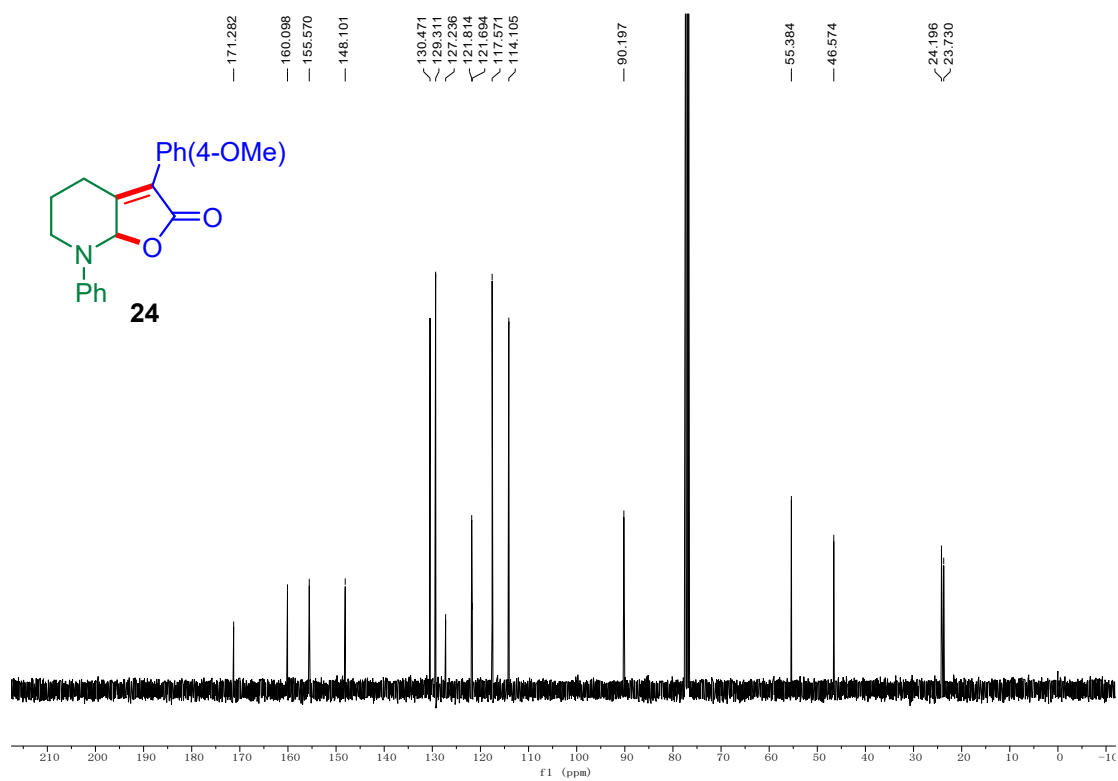

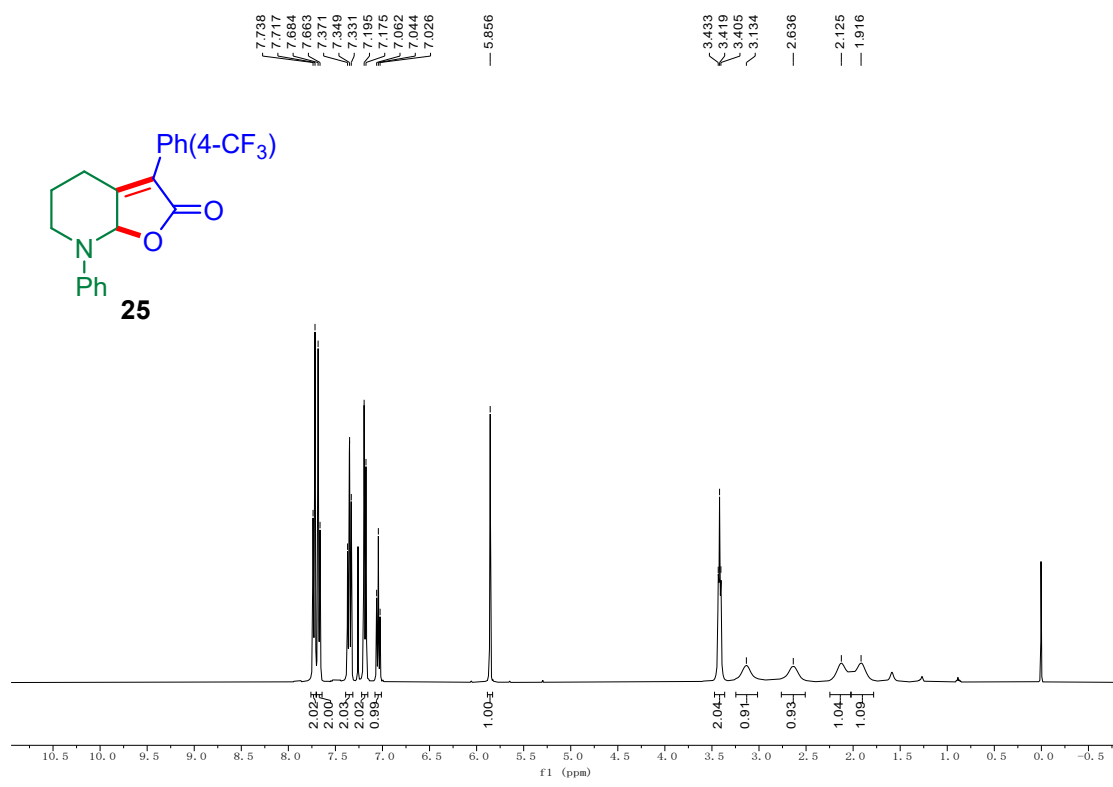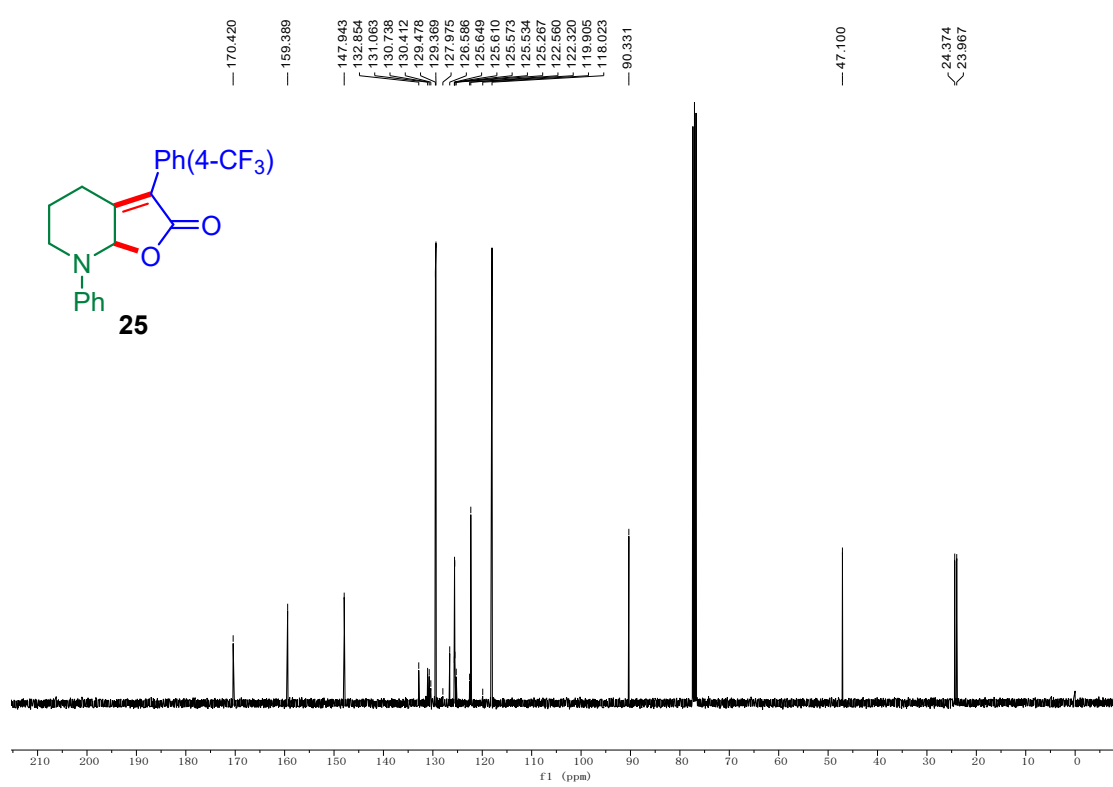



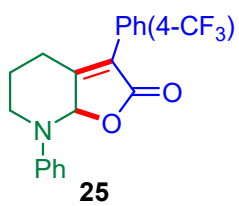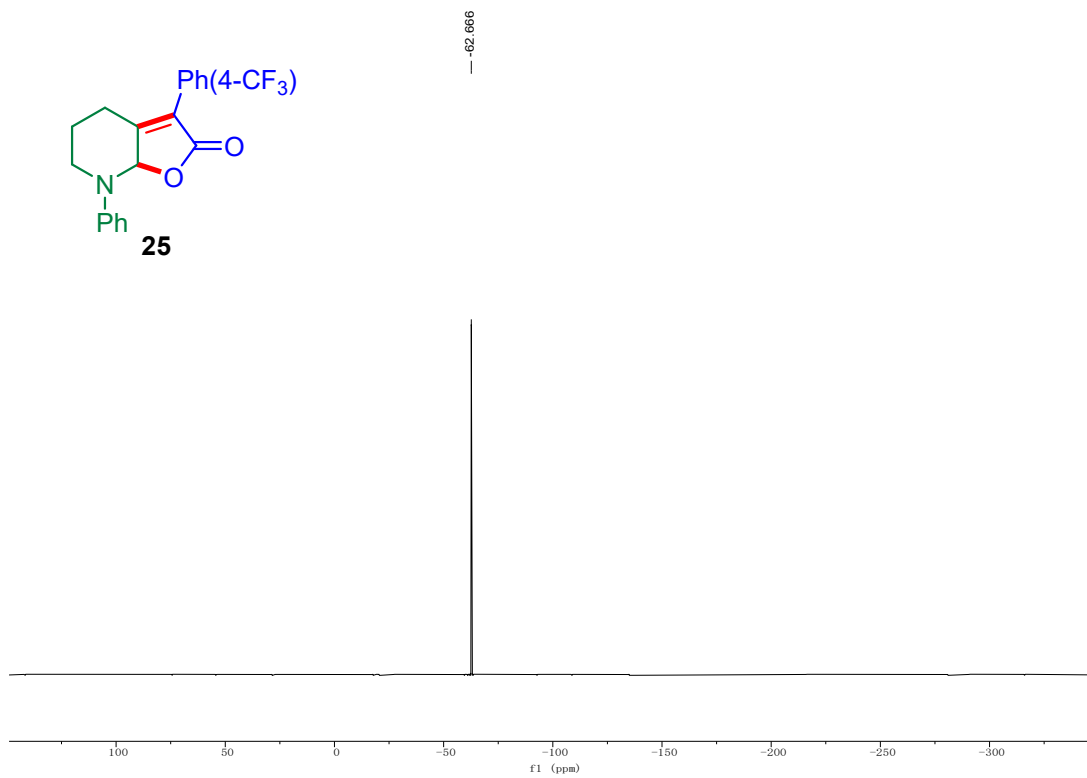

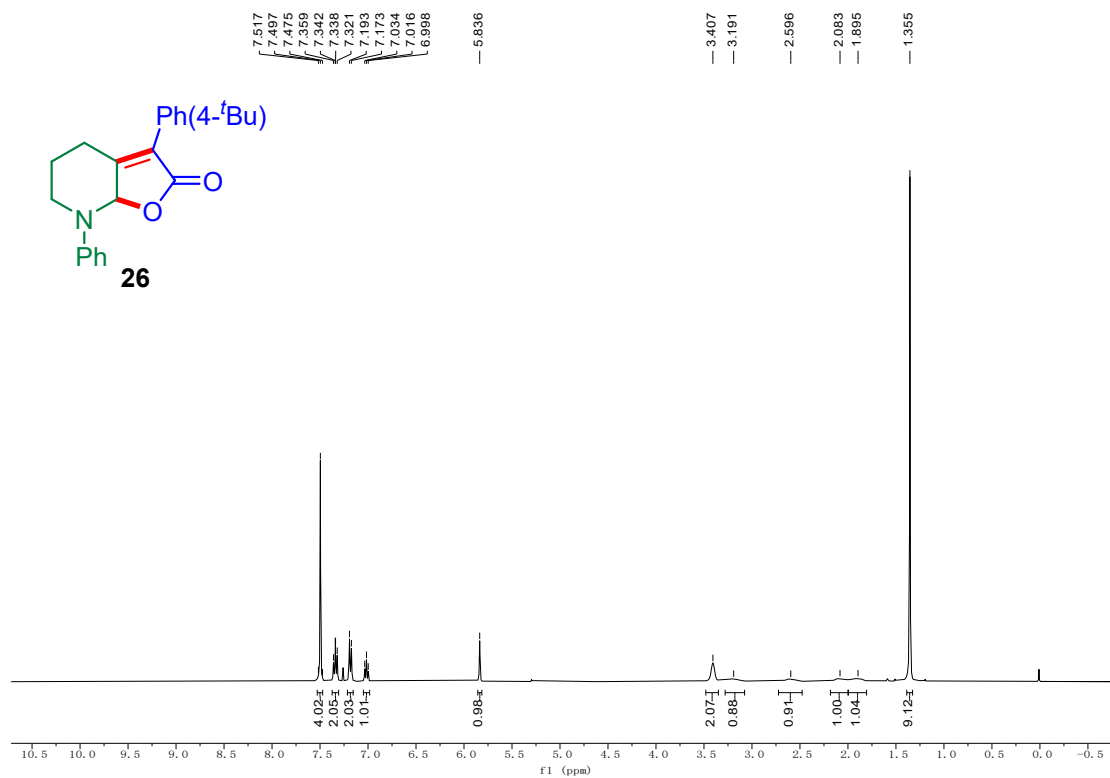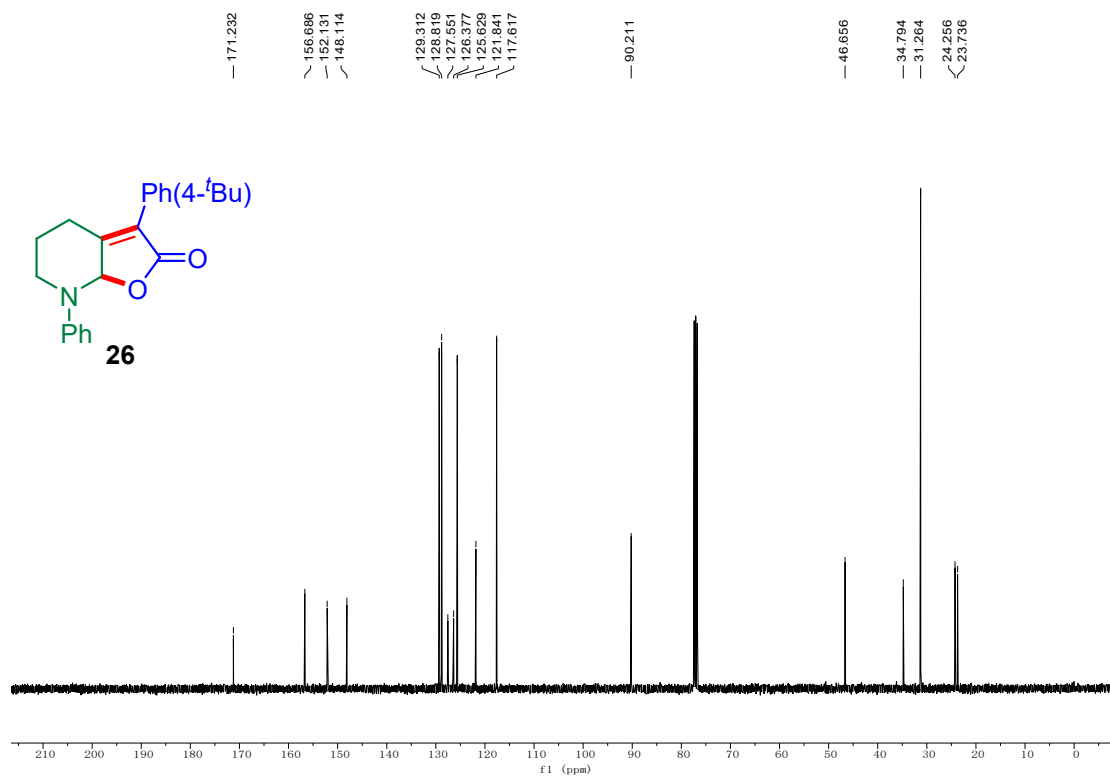

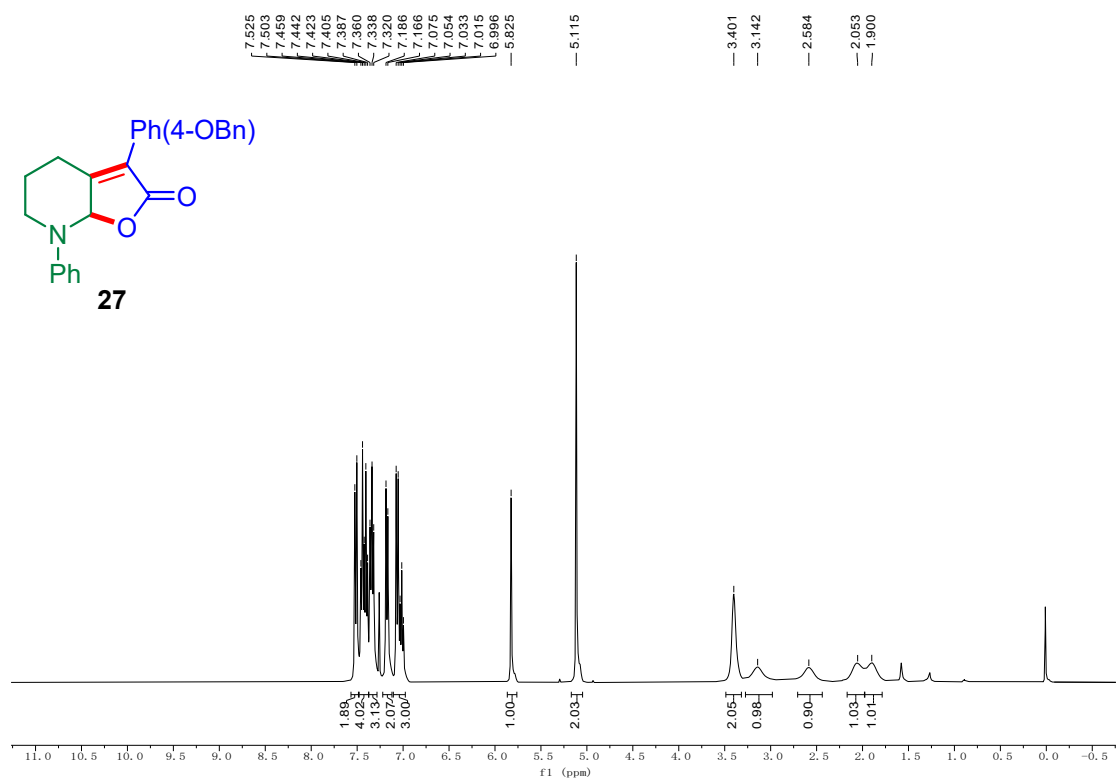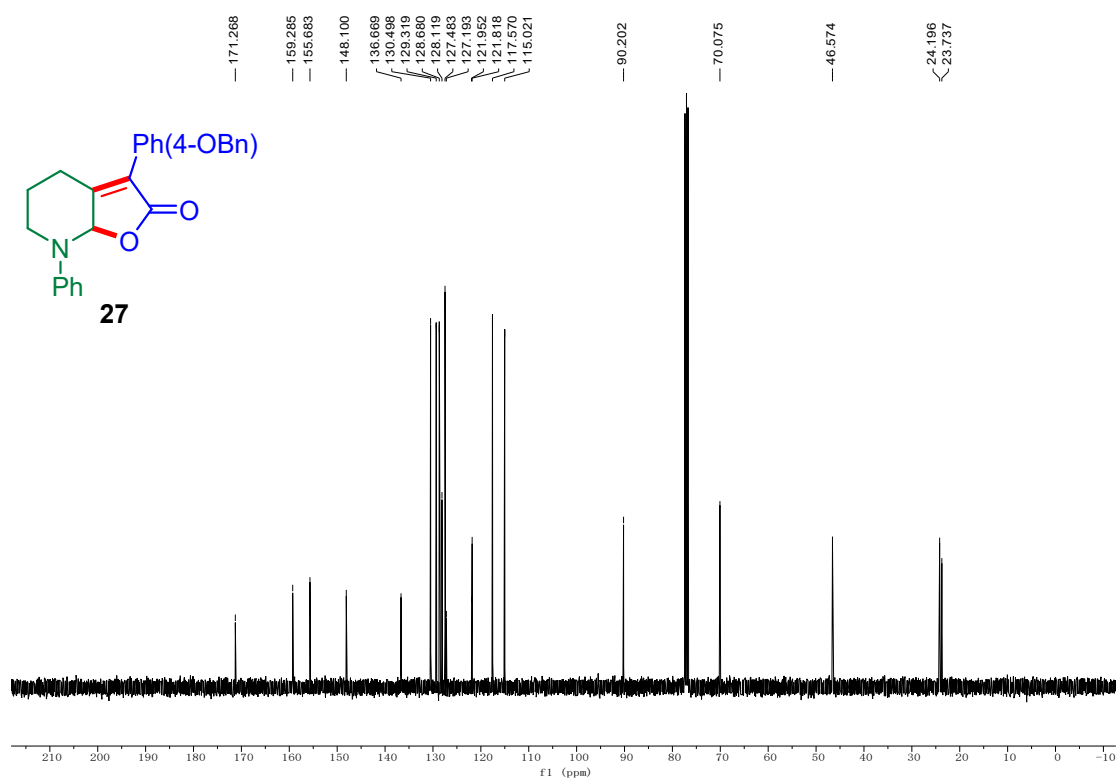

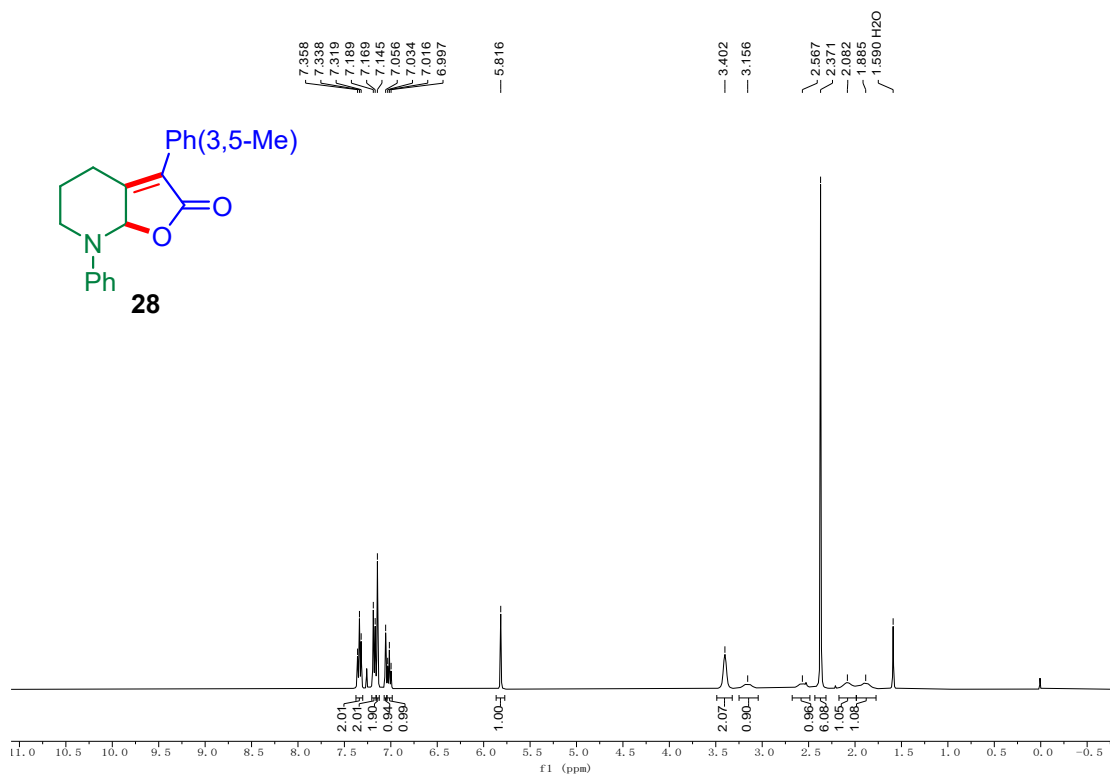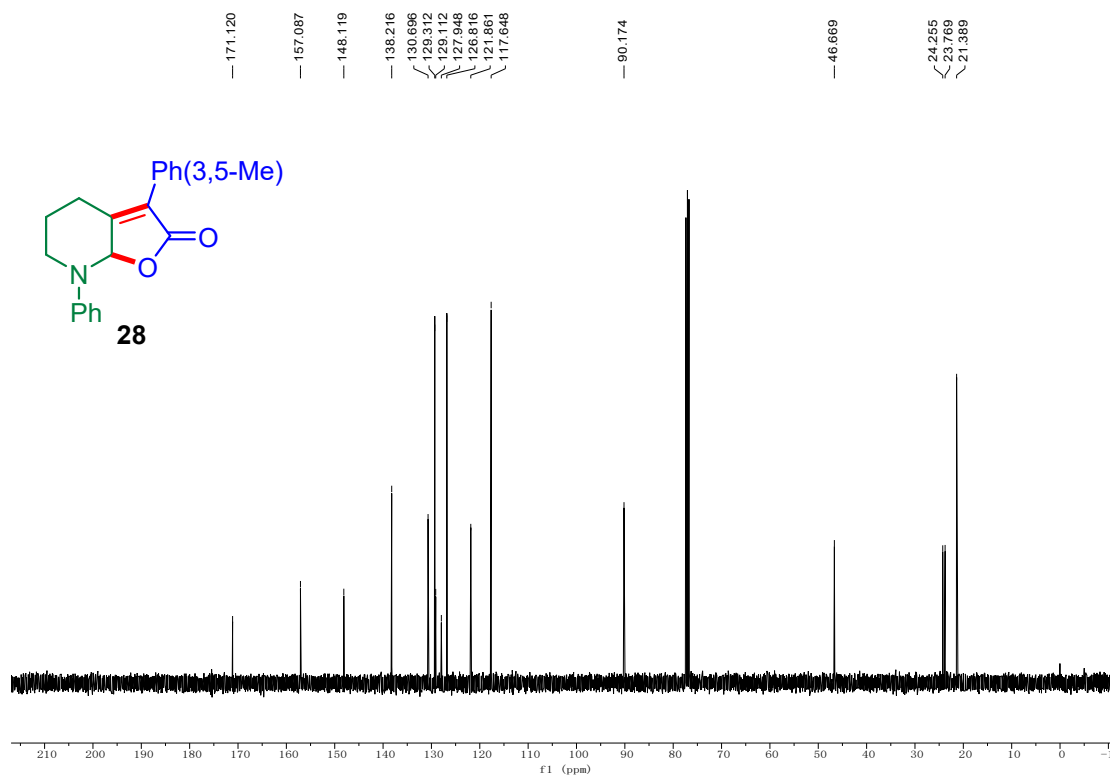

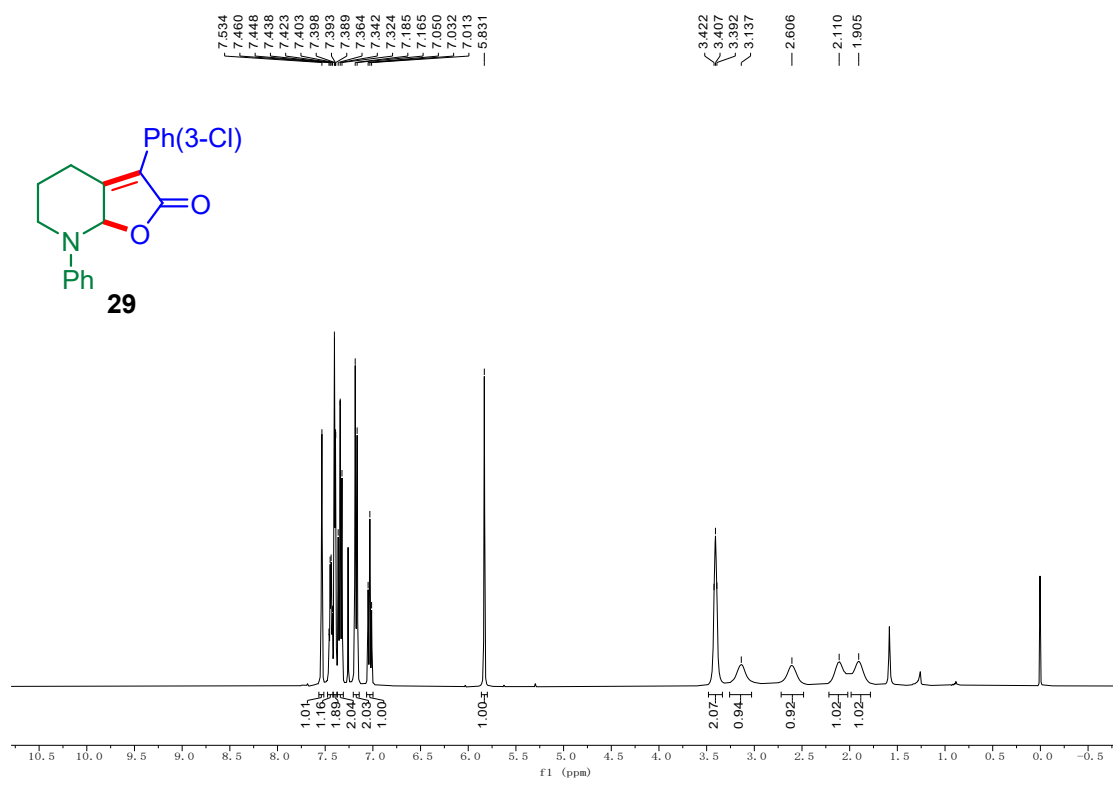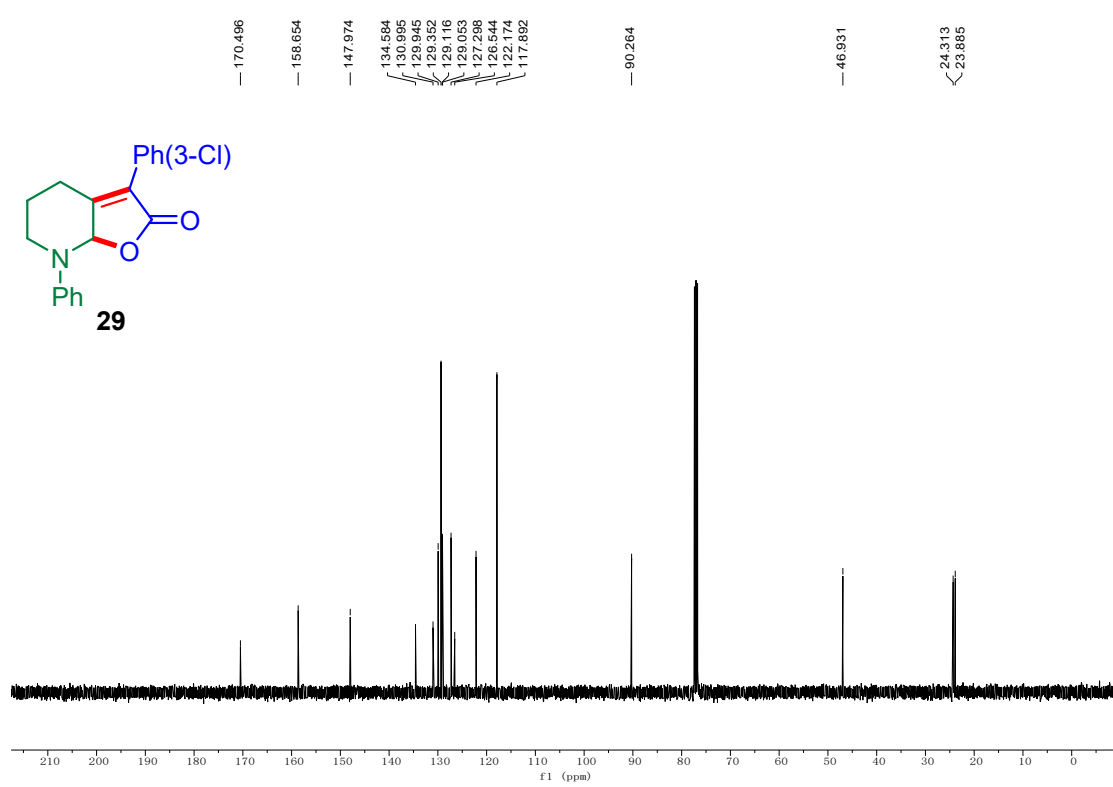

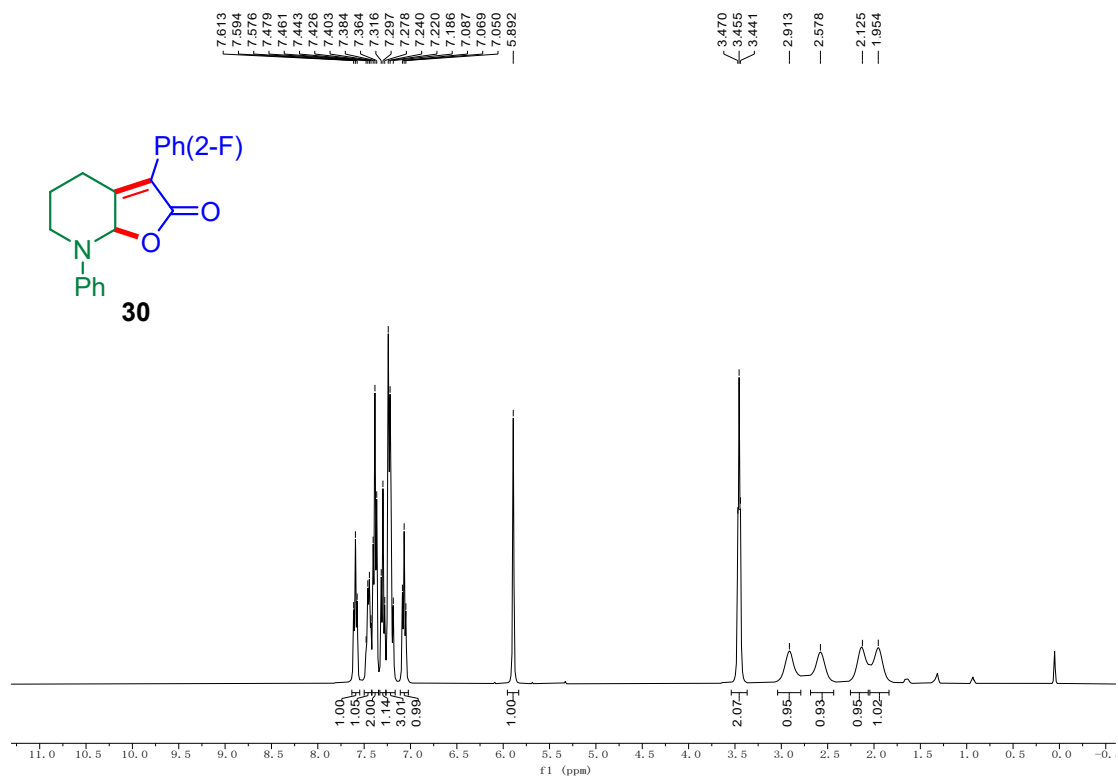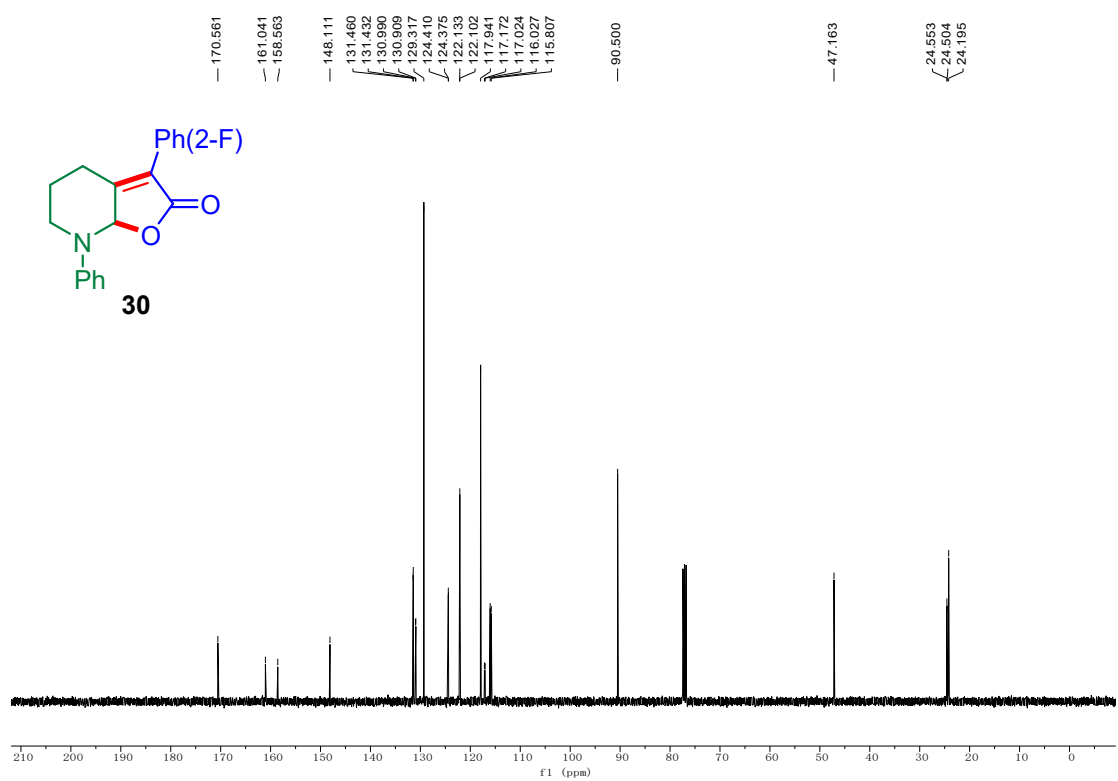

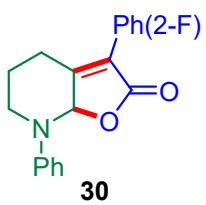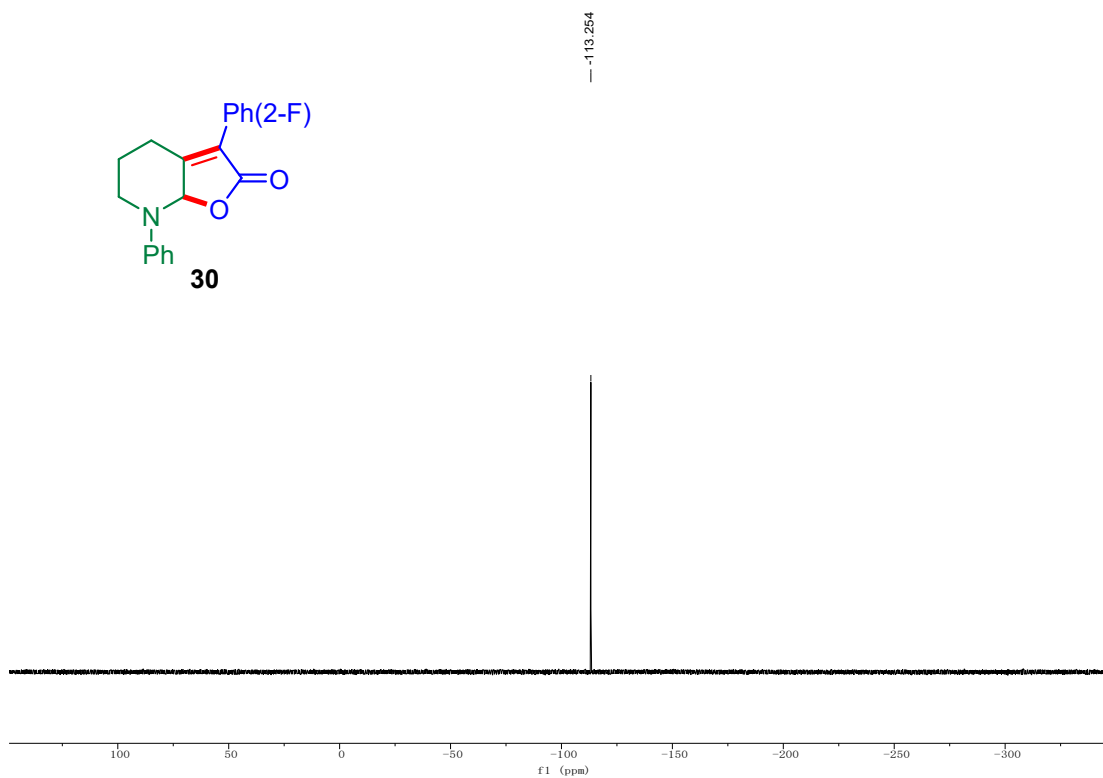

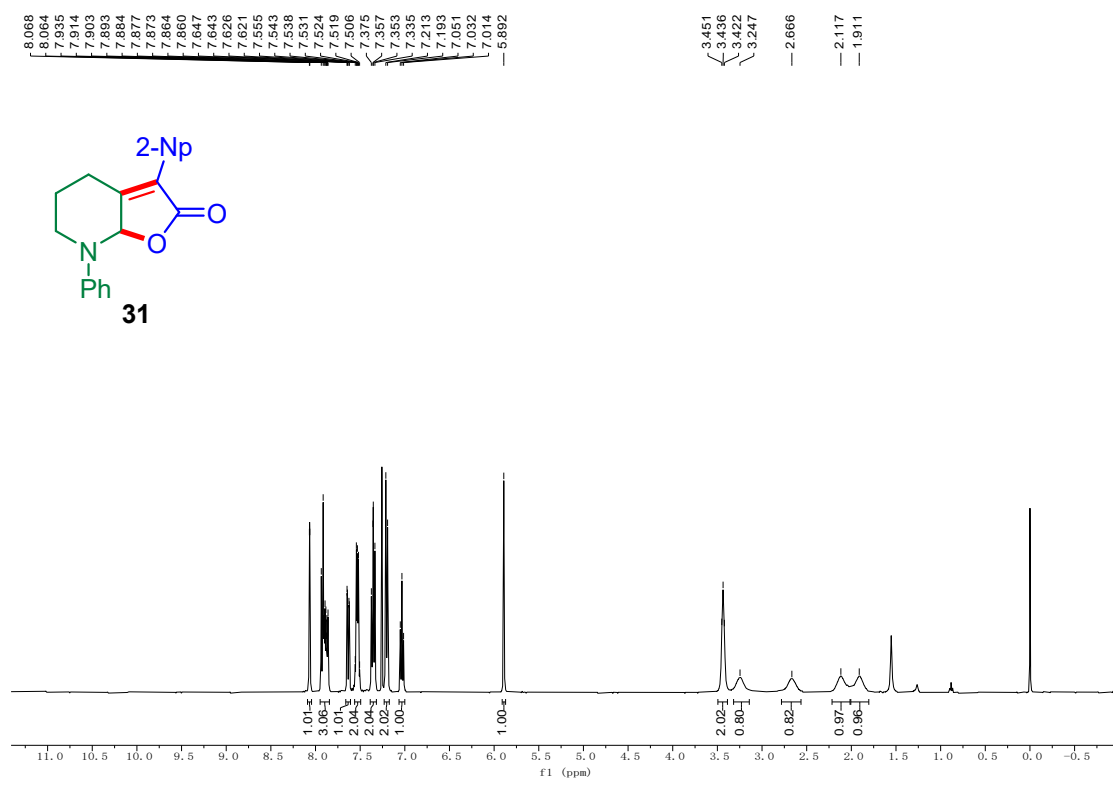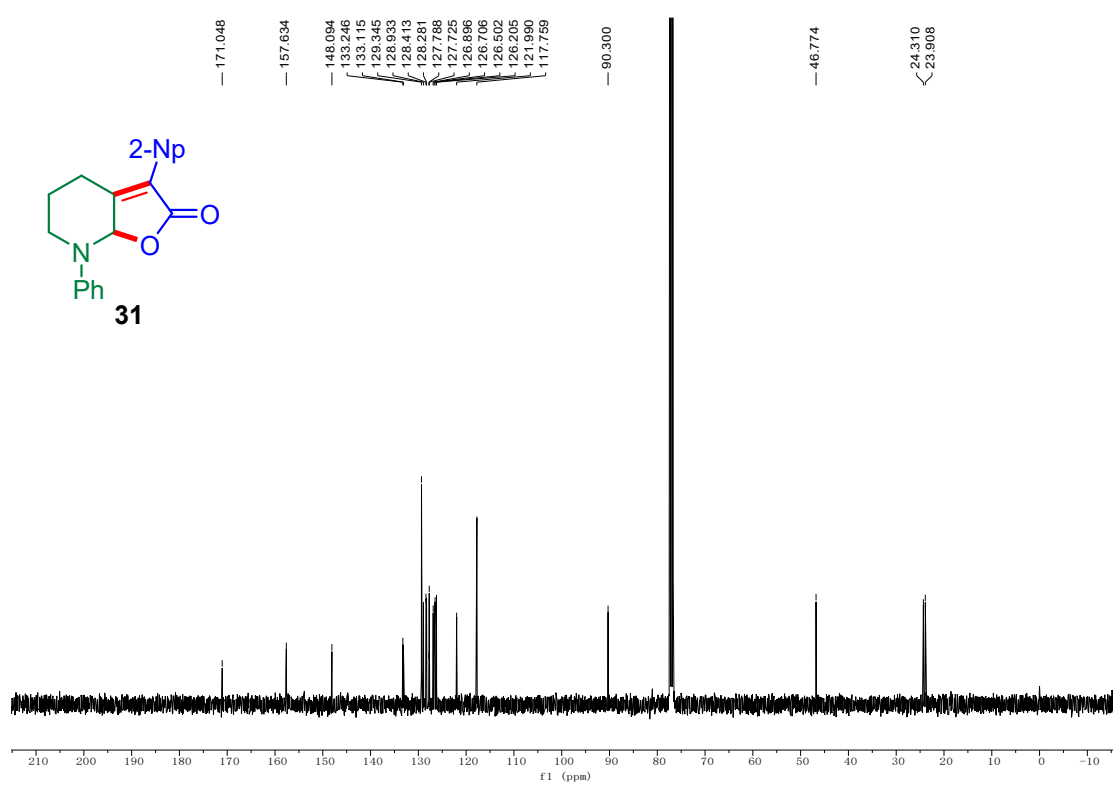



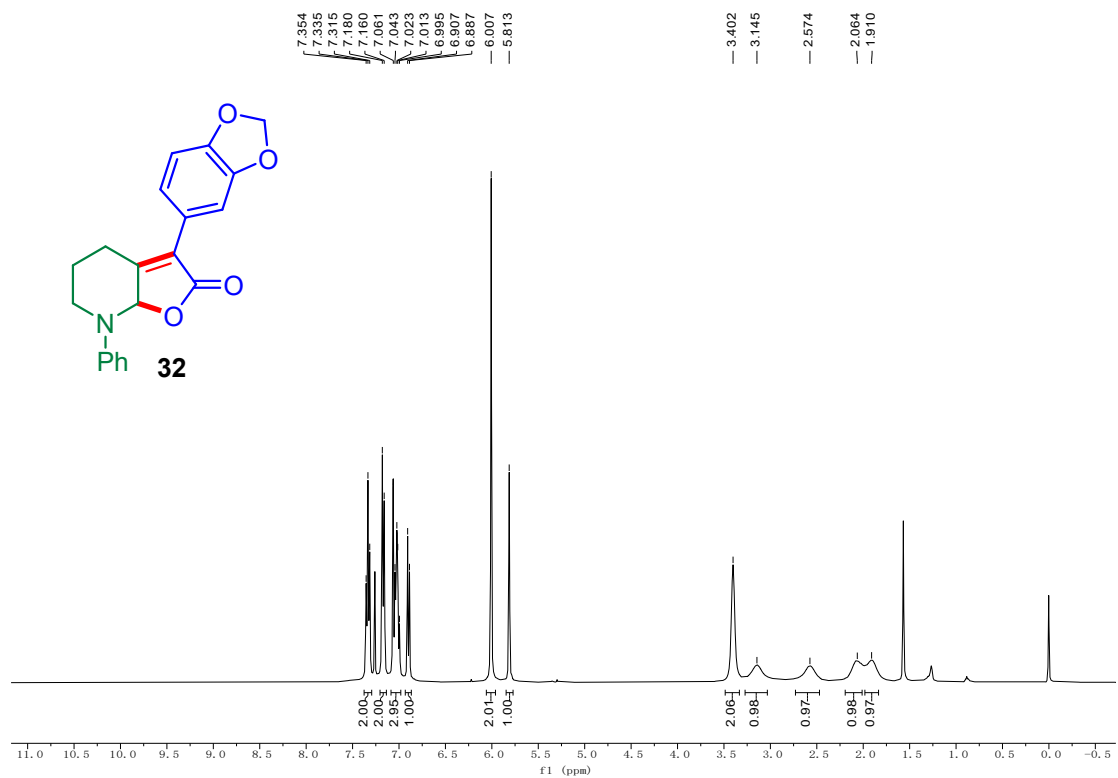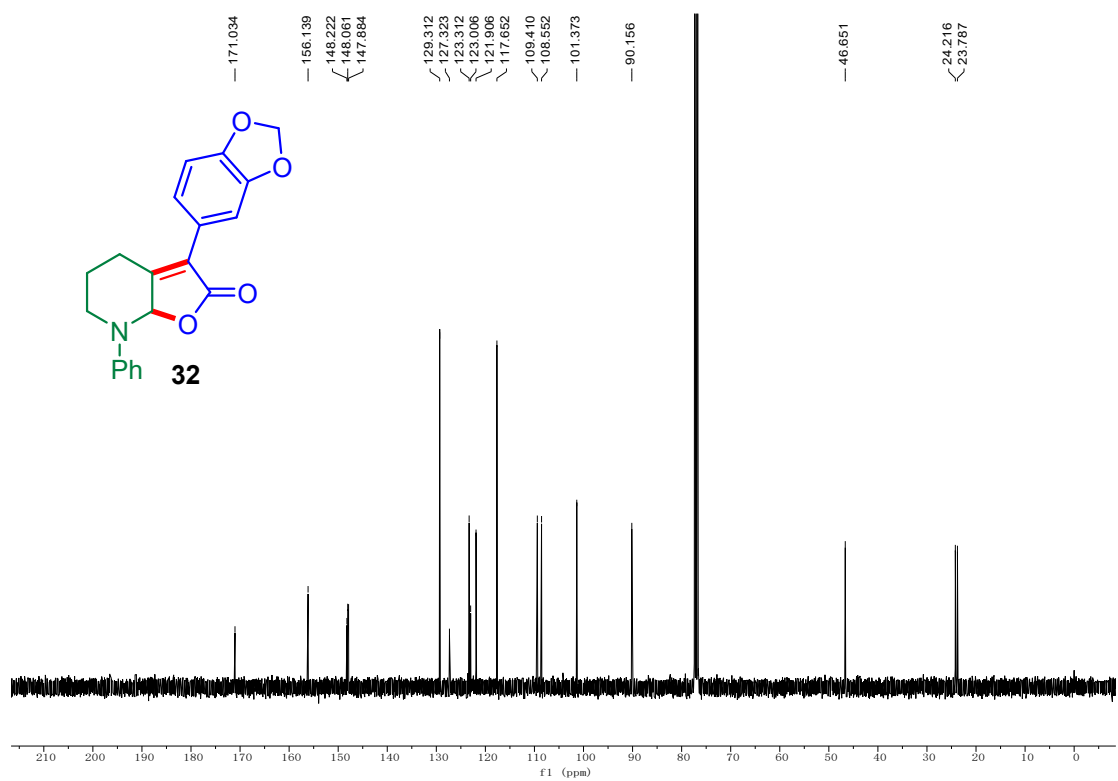



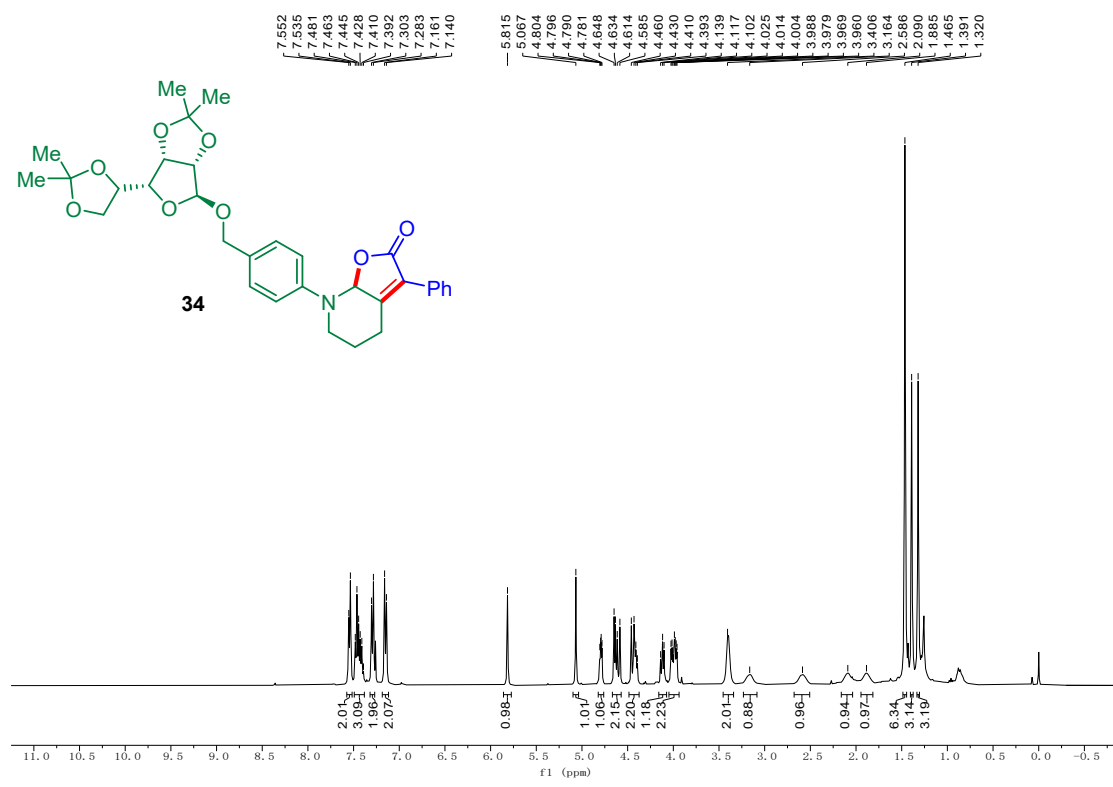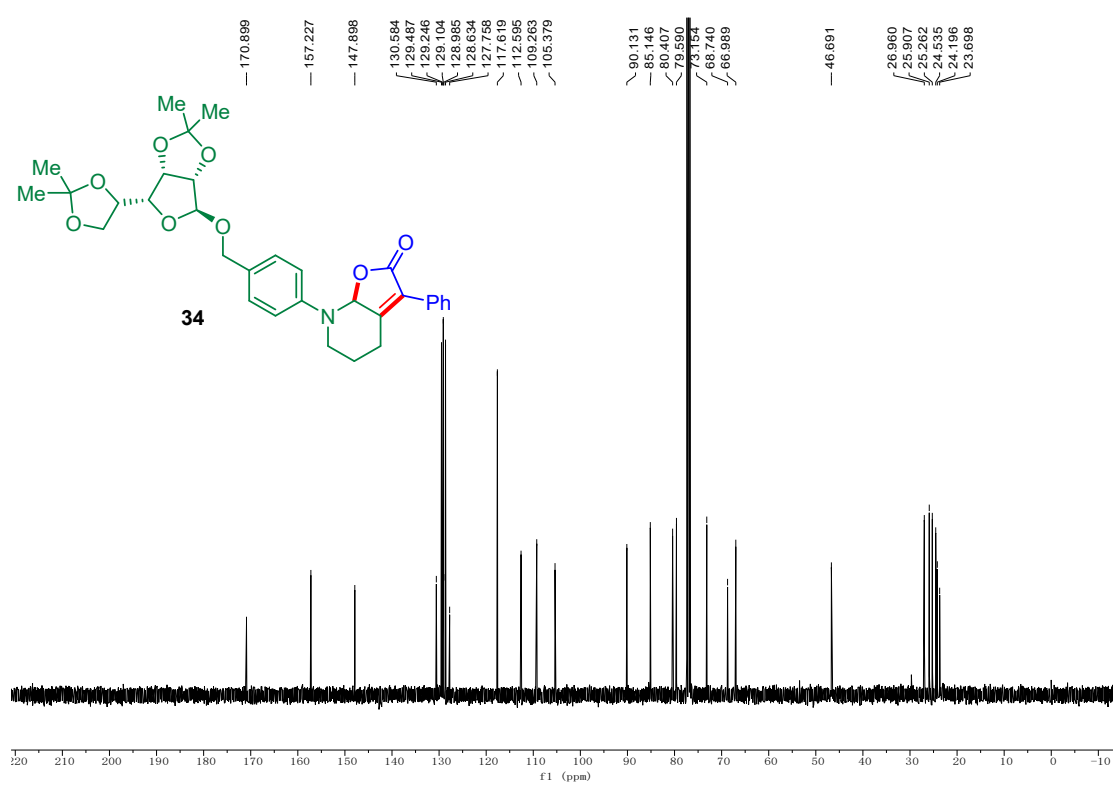

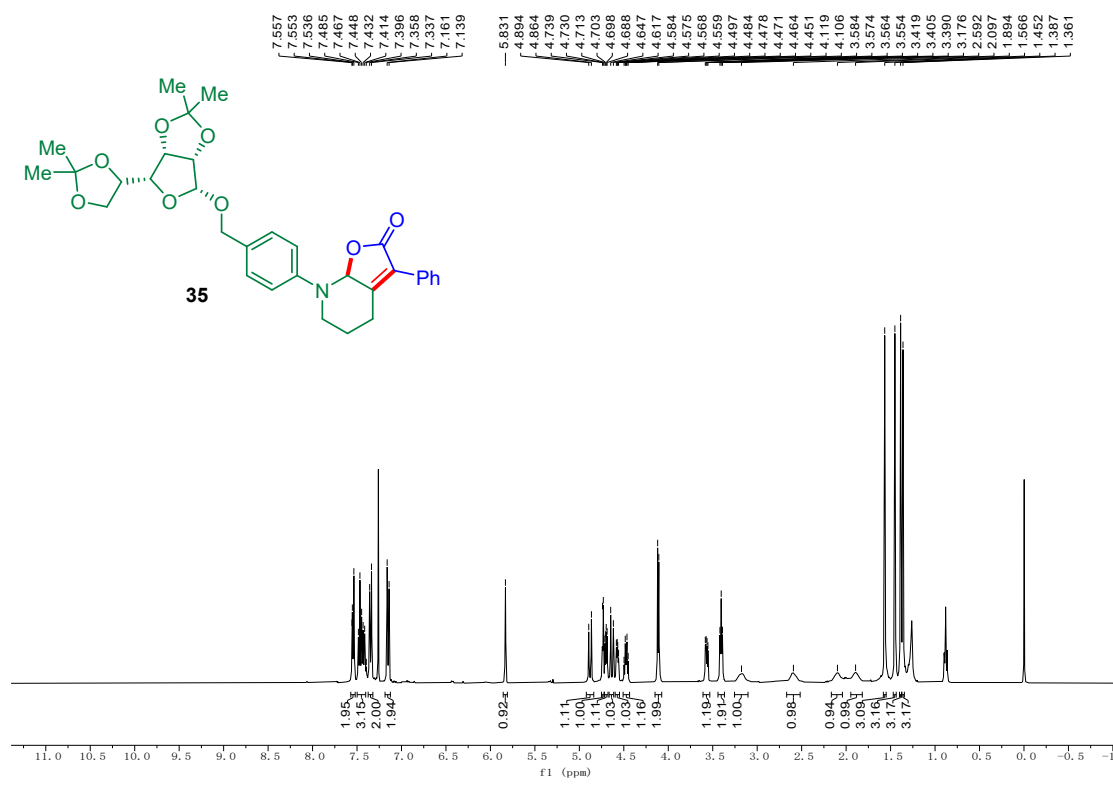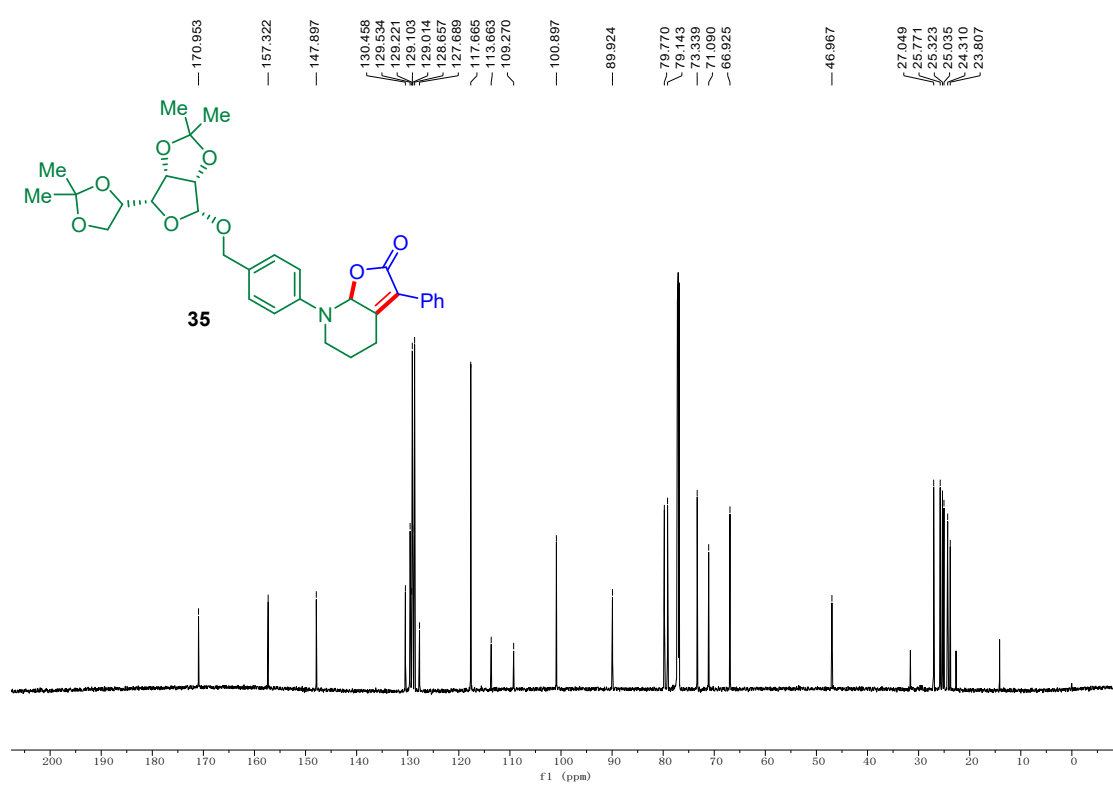

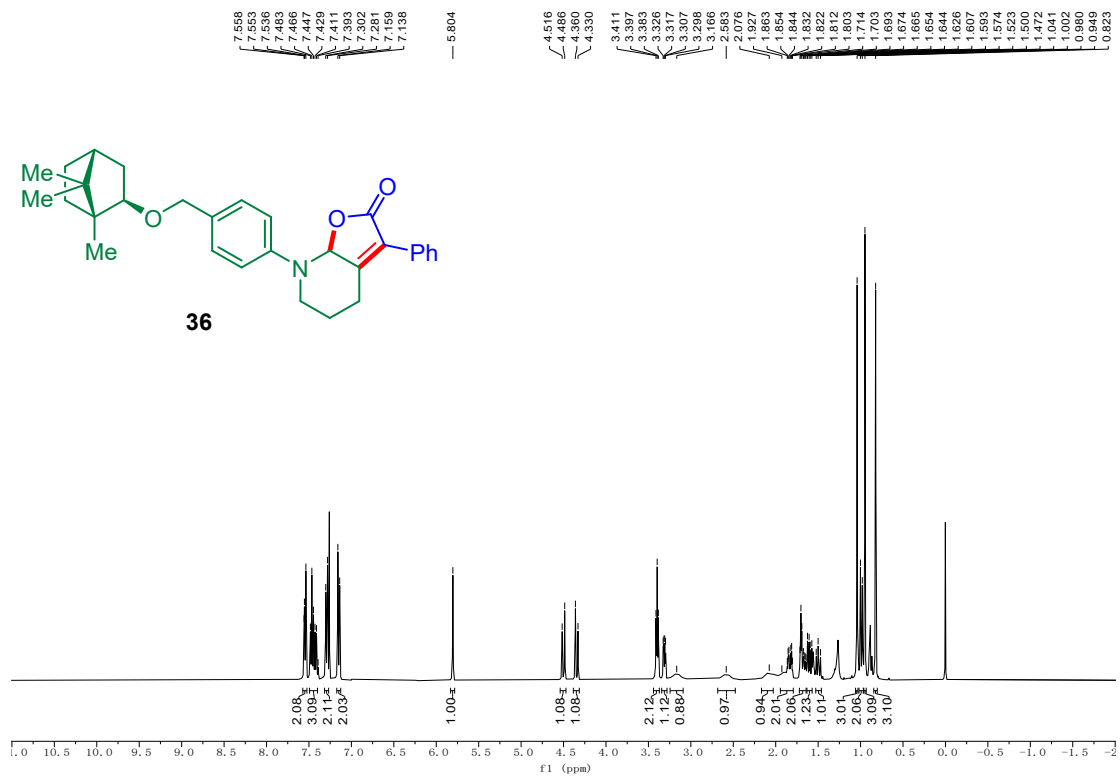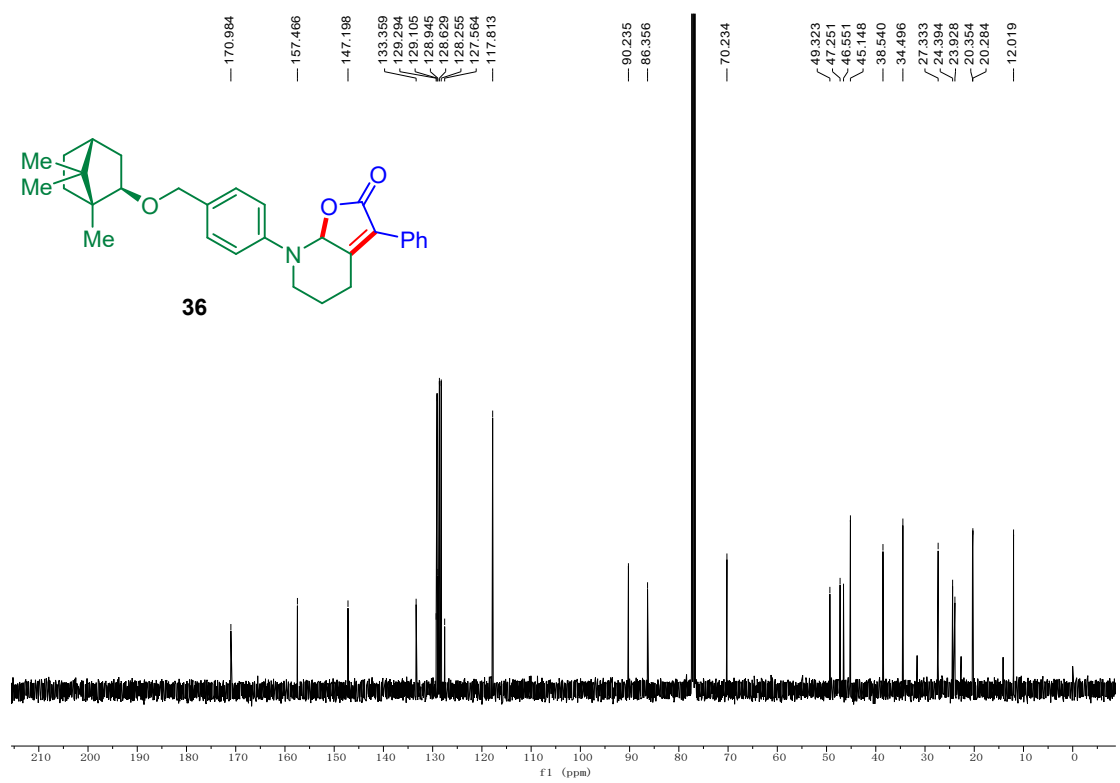

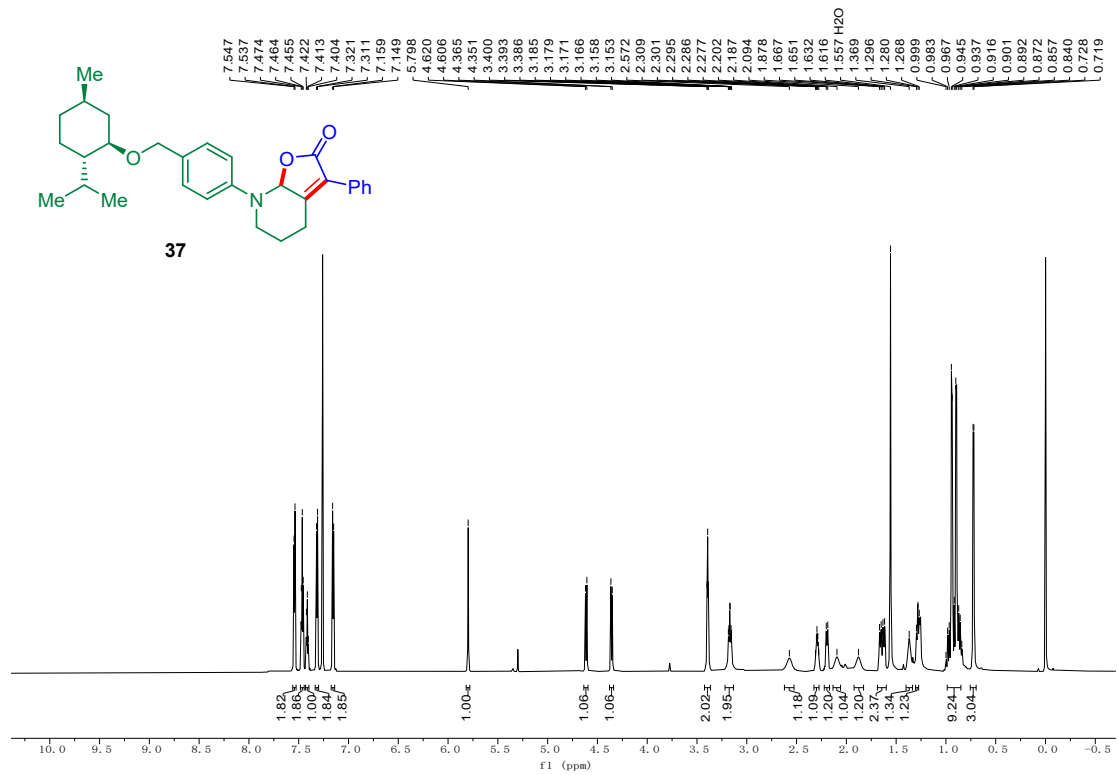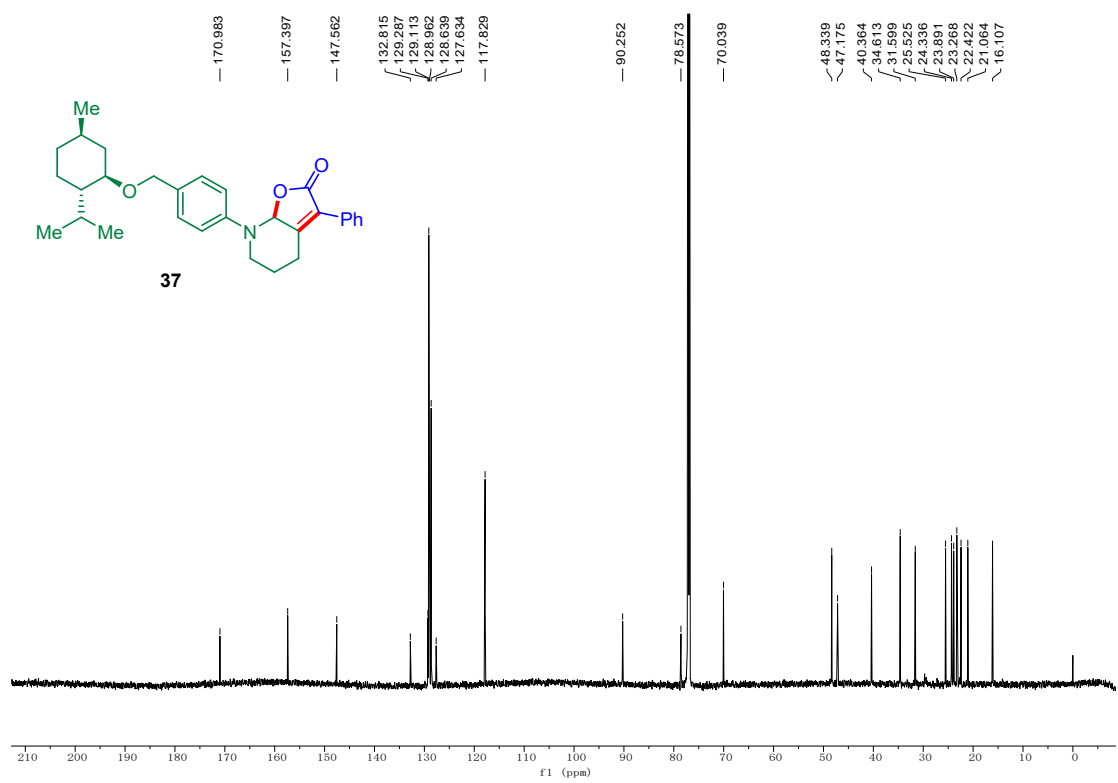

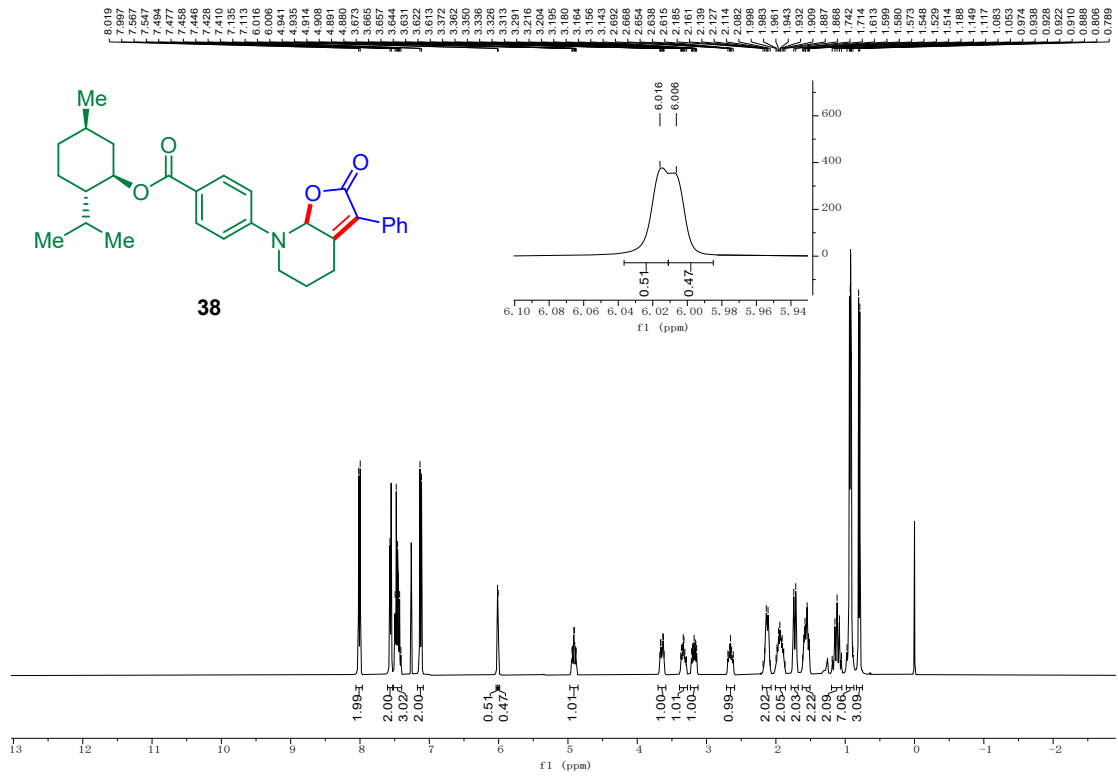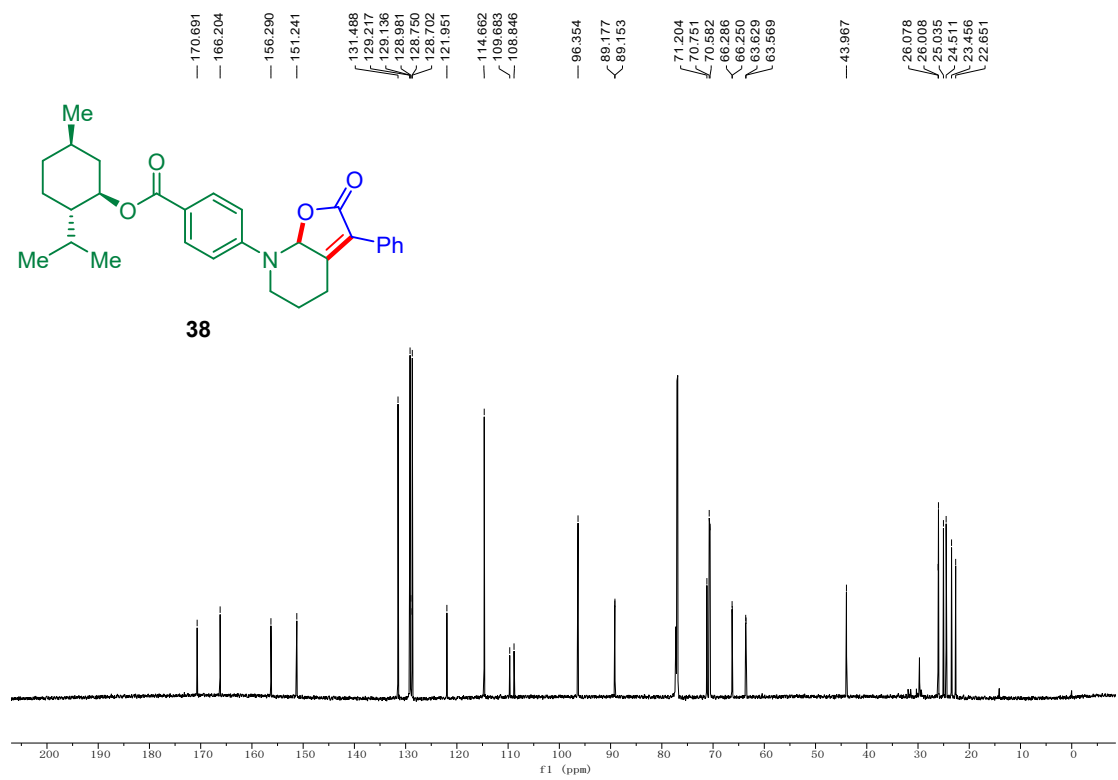

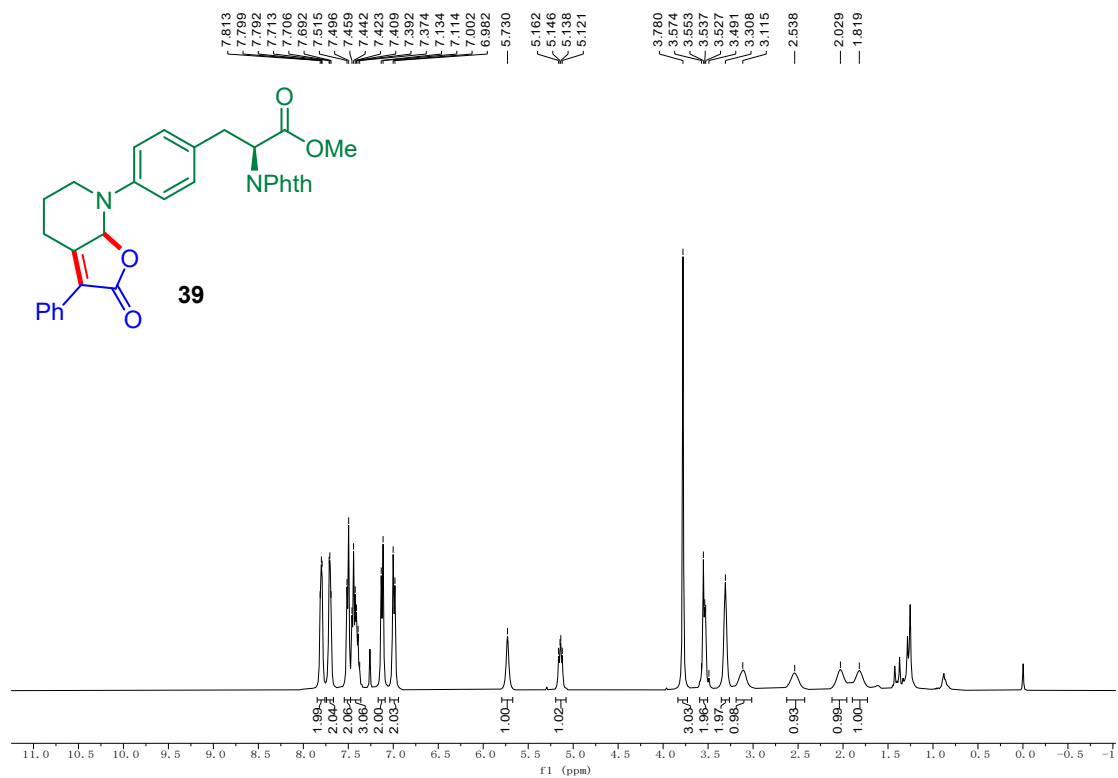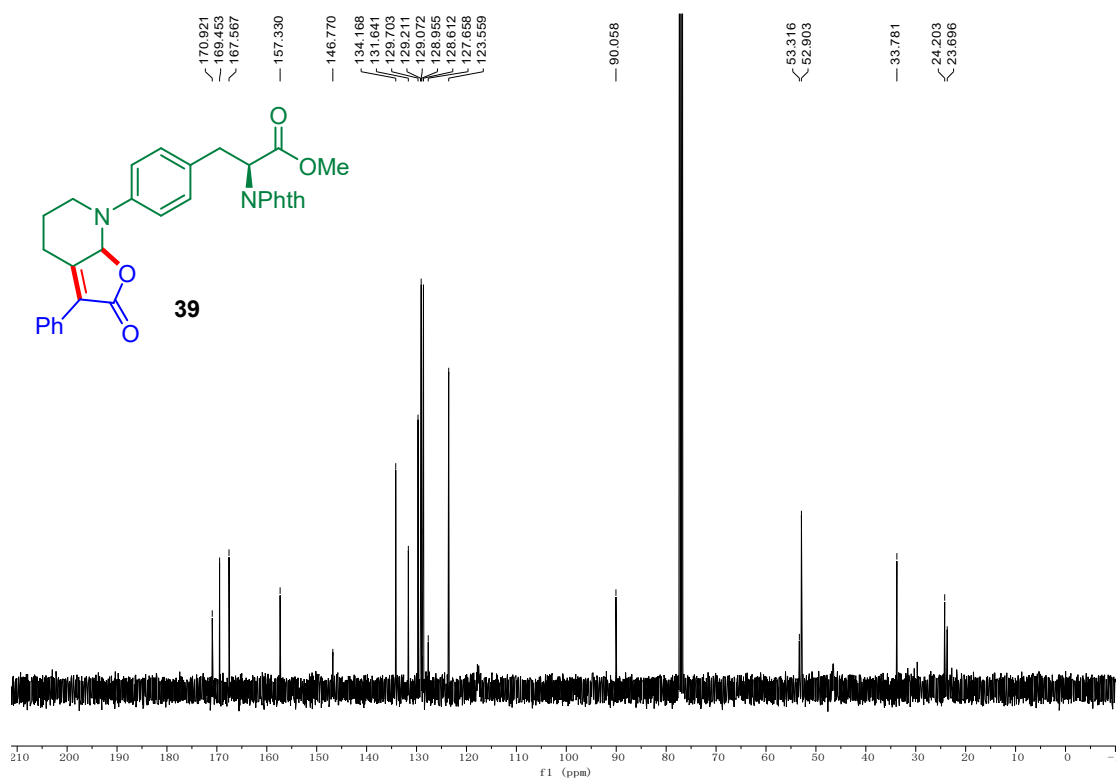



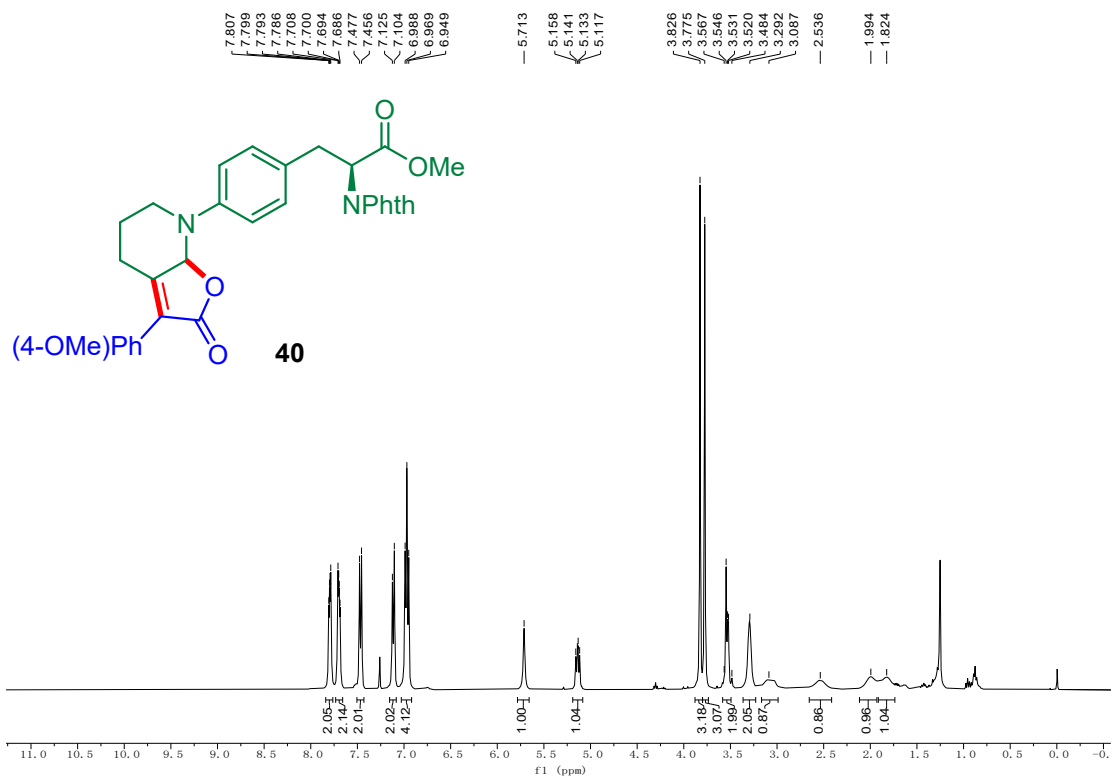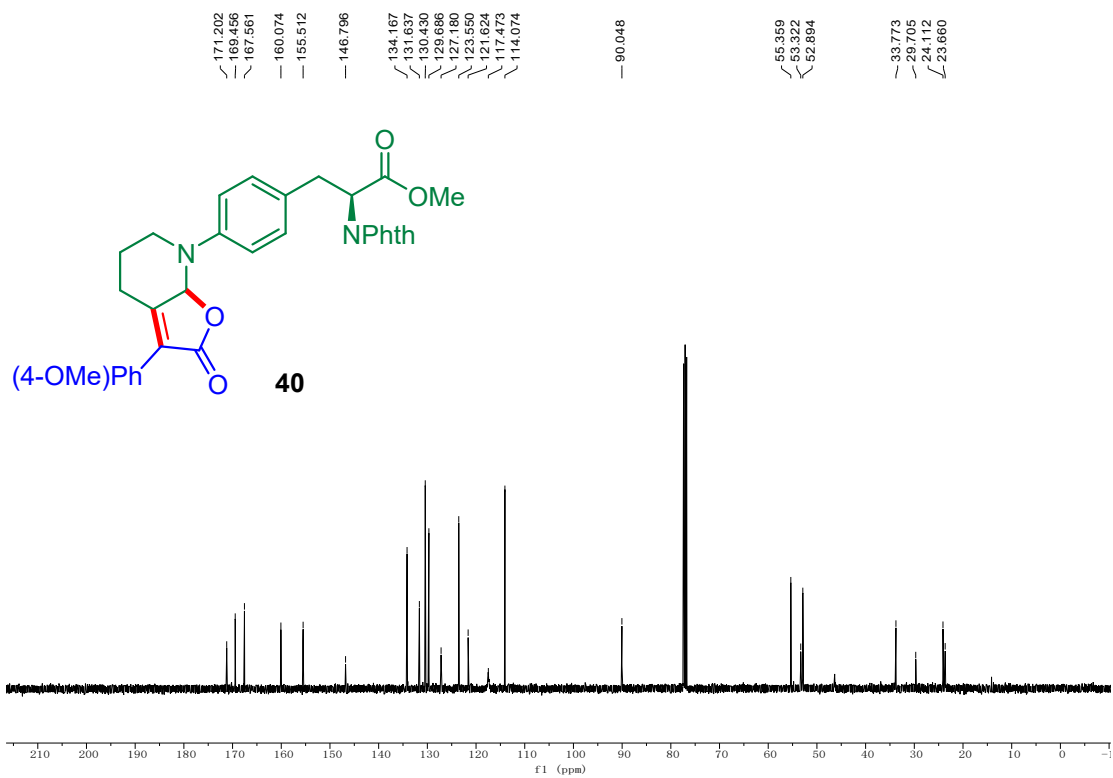

Supplement: d3gc00344b1.pdf [file d3gc00344b1.pdf]
